# Supplementary material for: Fragmentation of a dioxolanyl radical via nonstatistical reaction dynamics: characterization of the vinyloxy radical by ns time-resolved laser flash photolysis
Source: Royal Society of Chemistry journal article supplement (doi:10.1039/c8cp03311k), 2018-01-01
Supplement: c8cp03311k1.pdf [file c8cp03311k1.pdf]

Electronic Supplementary Information for

**Fragmentation of a Dioxolanyl Radical via Nonstatistical Reaction Dynamics:  
Characterization of the Vinyloxy Radical by ns Time-Resolved Laser Flash  
Photolysis**

Götz Bucher,\* Mukul Lal, Anup Rana and Michael Schmittel\*

**Table of Contents**

|                                   |     |
|-----------------------------------|-----|
| Synthesis of compounds            | S2  |
| Acid stability of 7               | S7  |
| Photolysis                        | S8  |
| Time resolved EPR                 | S9  |
| Laser flash photolysis            | S10 |
| Computations on stationary points | S11 |
| Calculated UV spectra             | S26 |
| Trajectory computations           | S27 |
| References                        | S63 |

## Synthesis of compounds

### General Information

All commercial reagents were used without further purification. Solvents were dried with the appropriate desiccants and distilled prior to use.  $^1\text{H}$  NMR and  $^{13}\text{C}$  NMR were recorded on Bruker 200 MHz or 400 MHz (Avance) machines using the deuterated solvent as the lock and residual protiated solvent as the internal reference ( $\text{CD}_3\text{Cl}$ :  $\delta_{\text{H}} = 7.26$  ppm and  $\delta_{\text{C}} = 77.0$  ppm). The following abbreviations were utilized to describe peak patterns: s = singlet, d = doublet, t = triplet, dd = doublet of doublet, td = triplet of doublet, dt = doublet of triplet, br = broad, bs = broad singlet, bd = broad doublet and m = multiplet. The numbering of the carbon atoms in the molecular formulae (*vide infra*) is used only for the assignments of the NMR signals and thus is not necessarily in accordance with IUPAC nomenclature. Melting points were measured on a Büchi SMP-20 instrument. Infrared spectra were recorded using a Varian 1000 FT-IR instrument. Elemental analysis was done on the EA 3000 CHNS.

### Synthesis of Model Compounds

#### [D]-1,2,5,6-Diisopropylidenemannitol (**12**)

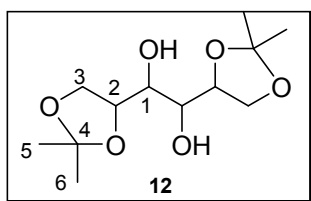

D-mannitol (36.0 g, 190 mmol) was added to a vigorously stirring dry acetone (150 mL) containing fused zinc chloride (75.0 g, 550 mmol) at 0 °C. A solution of potassium carbonate in water (100 g in 100 mL) was added slowly to the reaction mixture after 3 h. The precipitate was filtered and the filtrate was extracted with chloroform (3 × 300 mL). The combined organic layers were dried over  $\text{Na}_2\text{SO}_4$  (anhyd.) and concentrated.

**Yield:** 37.0 g (0.141 mol) of a white solid, 72%.

**Melting Point:** 120-122 °C (Lit:<sup>1</sup> 118-120 °C)

**IR** (NaCl):  $\tilde{\nu}$  ( $\text{cm}^{-1}$ ) = 3404 (b, OH), 3283, 2989 (s, CH), 2935, 2895, 1381, 1265, 1213, 1160, 1126, 1069, 1009, 943, 858, 800, 666, 516.

**$^1\text{H}$ -NMR** ( $\text{CDCl}_3$ , 200 MHz):  $\delta$  (ppm) = 1.34 (s, 6H, 5-H), 1.39 (s, 6H, 6-H), 2.82 (m, 2H, OH), 3.71 (t,  $J = 6.6$  Hz, 2H, 1-H), 3.91-4.13 (m, 6H, 2,3-H).

### [D]-2,3-Isopropylidenglyceraldehyde (**12**)<sup>2</sup>

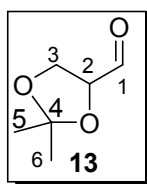

Sodium metaperiodate (12.5 g, 58.3 mmol) was added to [D]-1,2,5,6-diisopropylidenemannitol (10.0 g, 38.1 mmol) in dichloromethane (100 mL) and 4.40 mL of saturated sodium bicarbonate. The reaction was stirred at room temperature for 5 h, filtered and concentrated at temperature lower than 45 °C. The crude product was purified by distillation under reduced pressure.

**Yield:** 6.20 g (47.6 mmol) of a colourless liquid, 62%.

**Boiling Point:** 42-44 °C/11 mbar (Lit:<sup>3</sup> 31 °C/1 torr)

**IR** (NaCl):  $\tilde{\nu}$  (cm<sup>-1</sup>) = 3451 (m, OH), 2990 (s, CH), 2892, 2819, 1735 (s, C=O), 1456, 1375, 1255, 1220, 1151, 1073, 842.

**<sup>1</sup>H-NMR** (CDCl<sub>3</sub>, 200 MHz):  $\delta$  (ppm) = 1.39 (s, 3H, 5-H), 1.46 (s, 3H, H-6), 4.03-4.19 (m, 2H, 3-H), 4.33-4.40 (m, 1H, 2-H), 9.68 (s, 1H, 1-H).

**<sup>13</sup>C-NMR** (CDCl<sub>3</sub>, 50 MHz):  $\delta$  (ppm) = 26.3 (C-5), 27.2 (C-6), 66.6 (C-3), 80.7 (C-2), 112.3 (C-4), and 202.8 (C-1).

### Potassium-[D]-2,3-isopropylidenglycerate<sup>2</sup> (**14**)

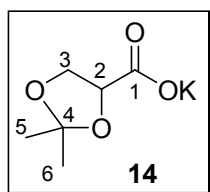

Potassium permanganate (10.3 g, 70.0 mmol) in water (250 mL) was added slowly to the crude [D]-2,3-isopropylidene acetaldehyde (6.50 g, 49.9 mmol) and potassium hydroxide (5.70 g, 100 mmol) in 100 ml of water at 0 °C. The solution was neutralized to pH 8 after 3 h. Water was removed by distillation producing a brown mass, which upon extraction with hot ethanol yielded a yellow oil. The oil, when precipitated with acetone (100 mL), furnished a white solid.

**Yield:** 6.50 g (35.3 mmol) of a white solid, 46%.

**Melting Point:** softens above 60° C.

**IR** (NaCl):  $\tilde{\nu}$  (cm<sup>-1</sup>) = 2992 (m, CH), 2958, 2881, 1620 (bs, C=O), 1372, 1259, 1218, 1149, 1067, 970, 846, 788, 512.

**<sup>1</sup>H-NMR** (D<sub>2</sub>O, 200 MHz):  $\delta$  (ppm) = 1.23 (s, 3H), 1.29 (s, 3H), 3.75 (dd,  $J$  = 8.2 Hz,  $J$  = 6.8 Hz, 1H, 2-H), 4.12 (t,  $J$  = 8.2 Hz, 1H, 3a-H), 4.31 (dd,  $J$  = 7.4 Hz,  $J$  = 6.8 Hz, 1H, 3b-H).

### [D]-2,3-Isopropylidene-glycerol chloride (15)

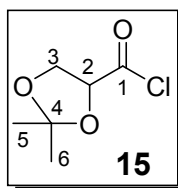

Oxalyl chloride (4.50 ml, 52.5 mmol), potassium [D]-2,3-isopropylidene-glycerate (4.60 g, 24.8 mmol) and 100  $\mu$ l of pyridine in 50 ml dry ether were stirred at room temperature for 20 h. The reaction mixture was then filtered and concentrated. The crude product was purified by distillation under reduced pressure.

**Yield:** 1.80 g (10.9 mmol) of a colourless liquid, 43%.

**Boiling Point:** 71-72 °C/25 mbar (Lit:<sup>2</sup> 70 °C/25 mbar).

**IR** (NaCl):  $\tilde{\nu}$  ( $\text{cm}^{-1}$ ) = 2992 (m), 2941, 2891, 1820 (s, C=O), 1777, 1456, 1385, 1226, 1113, 1074, 889, 839, 752, 642.

**<sup>1</sup>H-NMR** ( $\text{CDCl}_3$ , 200 MHz):  $\delta$  (ppm) = 1.38 (s, 3H, 5-H), 1.48 (s, 3H, H-6), 4.32 (d,  $J$  = 5.4 Hz, 2H, 3-H), 4.82 (t,  $J$  = 5.7 Hz, 1H, 2-H).

**<sup>13</sup>C-NMR** ( $\text{CDCl}_3$ , 50 MHz):  $\delta$  (ppm) = 26.3 (C-5), 26.6 (C-6), 67.9 (C-3), 82.1 (C-2), 114.0 (C-4), and 174.2 (C-1).

**DEPT-135** ( $\text{CDCl}_3$ , 50 MHz):  $\delta$  (ppm) = 26.3 (C-5), 26.6 (C-6), and 82.1 (C-2). Signal at 67.9 (C-3) inverted due to secondary nature of the carbon, while signals at 114.0 (C-4) and 174.2 (C-1) disappeared due to the quaternary nature of the carbons.

### 2,2-Dimethyl-[1,3]dioxolane-4-carboxylic acid 2-thio-2H-pyridin-1-yl-ester (7)

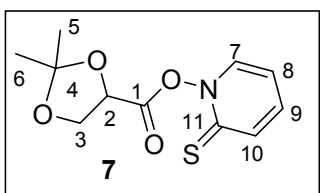

*N*-2-thiopyridineoxide sodium salt (1.67 g, 10  $\mu$ mol), [D]-2,3-diisopropylidene-glycerol chloride (1.77 g, 10  $\mu$ mol) and catalytic amount of DMAP were stirred in 50 mL of dry ether was stirred for 30 minutes in dark. The reaction mixture was filtered through a bed of celite and concentrated below 45 °C.

**Yield:** 2.28 g (8.93 mmol) of a cream-coloured solid, 83%.

**Melting point:** 62 °C

**IR** (NaCl):  $\tilde{\nu}$  ( $\text{cm}^{-1}$ ) = 3100 (w), 2992 (w), 1810 (s), 1736 (b), 1605 (s), 1527 (s), 1448 (s), 1372 (s), 1227 (b), 1132 (b), 1076 (bs), 963 (s), 840 (s), 740 (s).

**<sup>1</sup>H-NMR** (CDCl<sub>3</sub>, 200 MHz): δ (ppm) = 1.37 (s, 3H, 5-H), 1.49 (s, 3H, 6-H), 4.31 (dd, *J* = 9.1 Hz, *J* = 7.4 Hz, 1H, 2-H), 4.65 (dd, *J* = 9.1 Hz, *J* = 4.7 Hz, 1H, 3-H), 4.86 (dd, *J* = 7.4 Hz, *J* = 4.7 Hz, 1H, 3-H), 6.67 (td, *J* = 6.9 Hz, *J* = 2.0 Hz, 1H, 8-H), 7.12-7.21 (m, 1H, 9-H), 7.58 (dd, *J* = 9.1 Hz, *J* = 2.0 Hz, 1H, 10-H), 7.66 (dd, *J* = 7.0 Hz, *J* = 1.6 Hz, 1H, 7-H).

**<sup>13</sup>C-NMR** (CDCl<sub>3</sub>, 50 MHz): δ (ppm) = 26.7 (C-5), 26.8 (C-6), 66.7 (C-4), 68.2 (C-3), 74.5 (C-2), 134.0 (C-10), 137.7 (C-7), 138.8 (C-8, 9), 171.2 (C-1), 172.9 (C-11).

**DEPT-135** (CDCl<sub>3</sub>, 50 MHz): δ (ppm) = 26.7 (C-5), 26.8 (C-6), 74.5 (C-2), 134.0 (C-10), 137.7 (C-7), 138.8 (C-8, 9). Signal at 68.2 (C-3) inverted due to the secondary nature of the carbon while signals at 66.7 (C-4), 171.2 (C-1) and 172.9 (C-11) disappeared due to the quaternary nature of the carbon.

|                            |        |                                          |
|----------------------------|--------|------------------------------------------|
| <b>Elemental analysis:</b> | Calcd. | C = 51.75, H = 5.13, N = 5.49, S = 12.56 |
|                            | Found  | C = 51.06, H = 5.15, N = 5.56, S = 13.18 |

### 2,2-Dimethyl-propanoic acid 2-thioxo-2H-pyridin-1-yl-ester (**8**)<sup>4</sup>

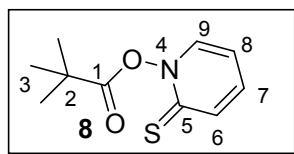

Pivalylchloride (2.0 g, 17 mmol) was added dropwise to a suspension of *N*-hydroxy-2-pyridinethione sodium salt (2.5 g, 17 mmol) and catalytic amount DMAP (100 mg) in 50 mL of dry ether at room temperature. After 45 min the reaction mixture was poured into water and extracted with ether (3 × 50 mL). The combined organic layer was then passed through celite (285) and washed with water (3 × 100 mL) and dried over Na<sub>2</sub>SO<sub>4</sub> (anhyd.) and concentrated at 40 °C.

**Yield:** 3.1 g (15 mmol) of cream coloured solid, 93%.

**Melting point:** 93-94 °C

**IR** (NaCl):  $\tilde{\nu}$  (cm<sup>-1</sup>) = 3069, 2975, 2931, 1789 (C=O), 1606, 1526, 1452, 1414, 1368, 1285, 1227, 1176, 1137, 1092, 1057, 1015, 941, 864, 840, 797, 759, 711, 524, 502.

**<sup>1</sup>H-NMR** (CDCl<sub>3</sub>, 200 MHz): δ (ppm) = 1.45 (s, 9H, 3-H), 6.62 (td, *J* = 6.9 Hz, *J* = 1.7 Hz, 1H, 8-H), 7.19 (td, *J* = 6.9 Hz, *J* = 1.7 Hz, *J* = 1.5 Hz, 1H, 7-H), 7.48 (dd, *J* = 7.0 Hz, *J* = 1.5 Hz, 1H, H-6), 7.67 (dd, *J* = 7.0 Hz, *J* = 1.7 Hz, 1H, 9-H).

**<sup>13</sup>C-NMR** (CDCl<sub>3</sub>, 50 MHz): δ (ppm) = 27.1 (C-3), 38.8 (C-2), 112.6 (C-9), 133.4 (C-6), 137.4 (C-7), 137.6 (C-8).

**HRMS:** C<sub>10</sub>H<sub>13</sub>NO<sub>2</sub>S, Calculated: 211.0667, Found: 211.0670

## Synthesis of Reference Compounds

### 2-(2,2-Dimethyl-[1,3]dioxolan-4-ylsulfanyl)-pyridine (**18**)

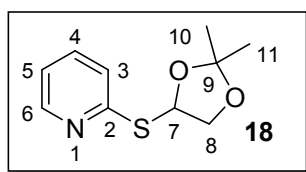

A solution of **7** (0.50 g, 2.0 mmol) in 25 mL of benzene (dry) was photolyzed (300 W UV-Lamp) for about 20 min. The reaction mixture was concentrated and purified by column chromatography with hexane - ethyl acetate as eluent. The pure product was collected as the second fraction with 20% ethyl acetate in hexane.

**Yield:** 0.3 g (1.4 mmol) of colourless oil, 73%.

**IR** (NaCl):  $\tilde{\nu}$  (cm<sup>-1</sup>) = 3046 (w), 2988 (m), 2937, 2872, 1578 (s), 1453 (s), 1417, 1374 (s), 1220 (b), 1148 (b), 1127, 1072 (bs), 989, 949, 838 (s), 760 (s), 725, 639, 514.

**<sup>1</sup>H-NMR** (CDCl<sub>3</sub>, 200 MHz):  $\delta$  (ppm) = 1.44 (s, 3H, 10-H), 1.53 (s, 3H, 11-H), 4.12 (dd, <sup>3</sup>J = 9.4 Hz, <sup>2</sup>J = 4.7 Hz 1H, 8-H), 4.46 (dd, <sup>3</sup>J = 9.4 Hz, <sup>2</sup>J = 6.4 Hz, 1H, 8-H), 6.34 (dd, <sup>3</sup>J = 6.4 Hz, <sup>3</sup>J = 4.7 Hz, 1H, 7-H), 7.00-7.06 (m, 1H, 5-H), 7.24-7.29 (m, 1H, 3-H), 7.45-7.55 (m, 1H, 4-H), 8.44-8.49 (m, 1H, 6-H).

**<sup>13</sup>C-NMR** (CDCl<sub>3</sub>, 50 MHz):  $\delta$  (ppm) = 26.0 (C-10), 26.0 (C-11), 70.0 (C-8), 80.1 (C-7), 115.5 (C-9), 120.2 (C-5), 122.1 (C-3), 136.4 (C-6,4), 149.7 (C-6).

### 2-*tert*-Butylsulphanyl-pyridine<sup>90</sup> (**19**)

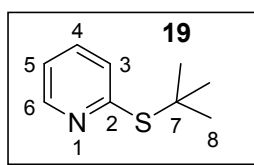

A solution of **78** (0.4 g, 2.0 mmol) in 25 mL of benzene (dry) was photolyzed (300 W UV-Lamp) for about 20 min. The reaction mixture was concentrated and purified by column chromatography with hexane - ethyl acetate as eluent. The pure product was collected as second fraction with 20% ethyl acetate in hexane (*R<sub>f</sub>* = 0.72).

**Yield:** 0.25 g (1.5 mmol) of colourless oil, 80%.

**IR** (NaCl):  $\tilde{\nu}$  (cm<sup>-1</sup>) = 3045 (w), 2961 (m), 2922, 1727, 1578 (s), 1556, 1449 (s), 1413, 1361 (s), 1278 (b), 1122 (b), 1072 (bs), 1044, 986, 758 (s), 724, 623.

**<sup>1</sup>H-NMR** (CDCl<sub>3</sub>, 200 MHz):  $\delta$  (ppm) = 1.50 (s, 9H, 8-H), 7.04-7.10 (m, 1H, 5-H), 7.33 (dd, *J* = 7.9 Hz, *J* = 0.7 Hz, 1H, 3-H), 7.51 (td, *J* = 7.7 Hz, *J* = 2.0 Hz, 1H, 4-H), 8.51 (dt, *J* = 4.2 Hz, *J* = 0.7 Hz, 1H, 6-H).

**<sup>13</sup>C-NMR** (CDCl<sub>3</sub>, 50 MHz):  $\delta$  (ppm) = 30.9 (C-8), 47.5 (C-7), 120.7 (C-5), 127.4 (C-3), 135.9 (C-6,4), 149.4 (C-2).

## Acid stability of **7**

### General Information

As the idea of generating ethenol radical cation from **7** would require acidic conditions, it was necessary to evaluate the acid sensitivity of **7**. Using the absorption band at  $\lambda_{\text{max}} = 360 \text{ nm}$ , any change by protonation can easily be followed by monitoring the absorbance changes.

### Testing Compound **7**

An increasing amount of trifluoroacetic acid (38.5 mM: stock solution) was added stepwise to a solution of **7** (0.10 mM). After adding an equimolar quantity of TFA to **7**, a very small decrease in absorption was observed at  $\lambda_{\text{max}} = 360 \text{ nm}$  (Figure S1a). A further increase in acid concentration not only decreased the absorption at  $\lambda_{\text{max}} = 360 \text{ nm}$  but additionally led to a 12 nm shift of the chromophore to  $\lambda_{\text{max}} = 348 \text{ nm}$  (Figure S1c).

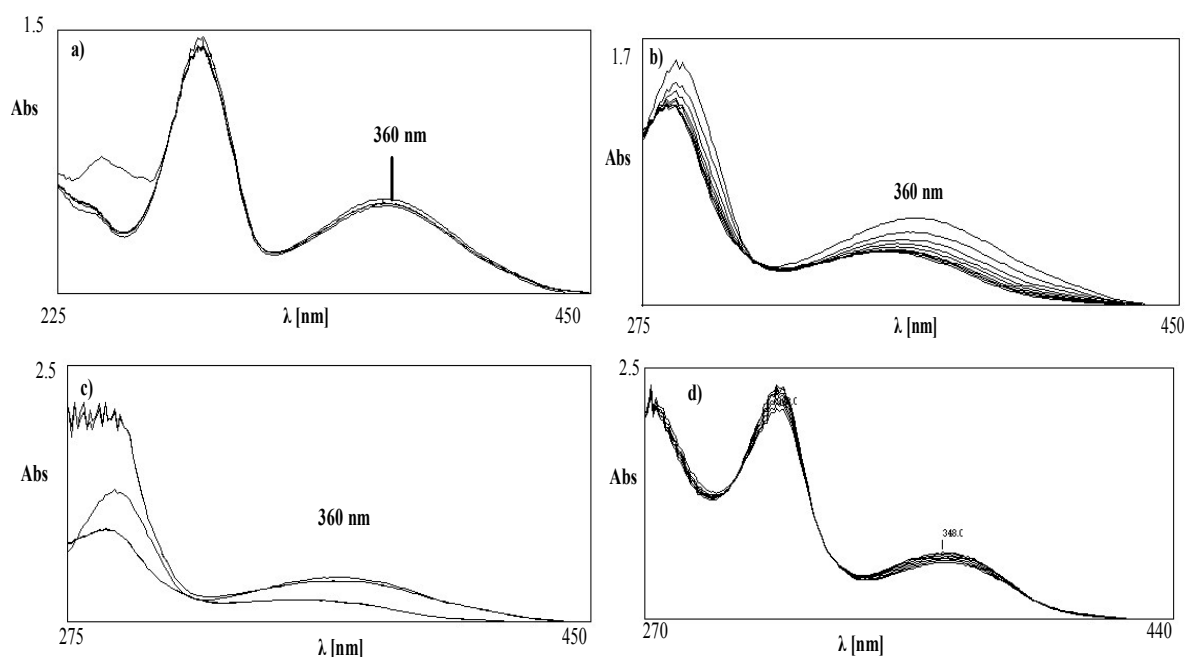

**Figure S1:** Addition of TFA to **7**, a) 1 eq. of TFA followed by addition of 1.1 eq. pyridine, b) serial addition of up to 70 eq. of TFA, c) addition of 70 eq. of TFA followed by addition of 1.1 eq. of pyridine, d) time dependent measurement (over 5 h) over the decay of **7** with 56 eq. of TFA.

Interestingly, a plateau was reached after the addition of 28 equivalents of TFA to Barton ester **7** (Figure S2). The original spectrum of the acid-free **7** was retained after the addition of a slight excess

of pyridine as base (dilution factor taken into account) to the acidified solution clearly showing a reversible protonation of the chromophore.

The above experiments with the addition of TFA to **7** clearly showed that it was not very sensitive to the TFA at low concentrations. The process of protonation was reversible in the time frame of about 3-4 h.

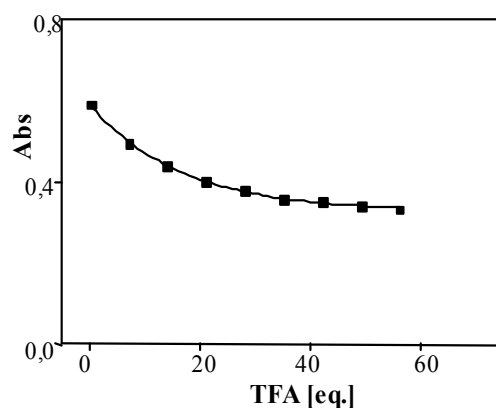

**Figure S2:** Absorbance changes at 360 nm upon addition of TFA to **7** (0 - 56 equiv. of TFA).

## Photolysis

### Steady State Photolysis

Photolysis of **8** (568  $\mu\text{M}$ ) in the presence of an equimolar concentration of ferrocene and TFA showed a decrease in the 370 nm band but no formation of any long absorbing species above 400 nm. Even with 9 eq. of TFA (5.19 mM) no formation of any long absorbing species was observed.

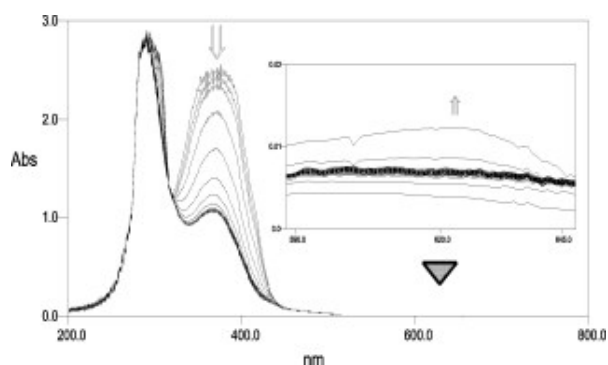

**Figure S3:** UV-Vis changes observed during the photolysis of **8** (568  $\mu\text{M}$ ) in presence of both ferrocene (567.9  $\mu\text{M}$ ) and TFA (5.19 mM). The overall UV-vis spectrum is an overlay of measurements made at every second over a period of 90 s.



## Product Analysis after Steady State Photolysis

Preparative scale photolysis was carried out for **7** and **8** in dry benzene. The photolysis products were purified by column chromatography with hexane and ethyl acetate as eluent. Alkyl-2-pyridylsulfides **18** (20% ethyl acetate in hexane,  $R_f = 0.35$ ) and **19** (10% ethyl acetate in hexane,  $R_f = 0.72$ ) were obtained. A substantial amount of **6** was also obtained as a by-product when photolysis was carried out at high concentrations of the Barton ester due to the involvement of radical **5** in the radical chain propagation step.

Photolysis of Barton ester **7** (1.57 mM) was carried out both in the absence and in the presence of an equimolar amount of TFA (1.57 mM) and the products were analyzed by HPLC. The chromatograms typically had four peaks at 4.78, 5.24 (**18**), 7.26 and 9.25 min (**6**) (both in acid and in absence of acid). Interestingly, the peak area for **6** remained more or less unchanged in both the experiments. Based on calibration curves the overall conversion of **7**→**18** in the absence of acid was calculated as 89% and as 59% in the presence of TFA.

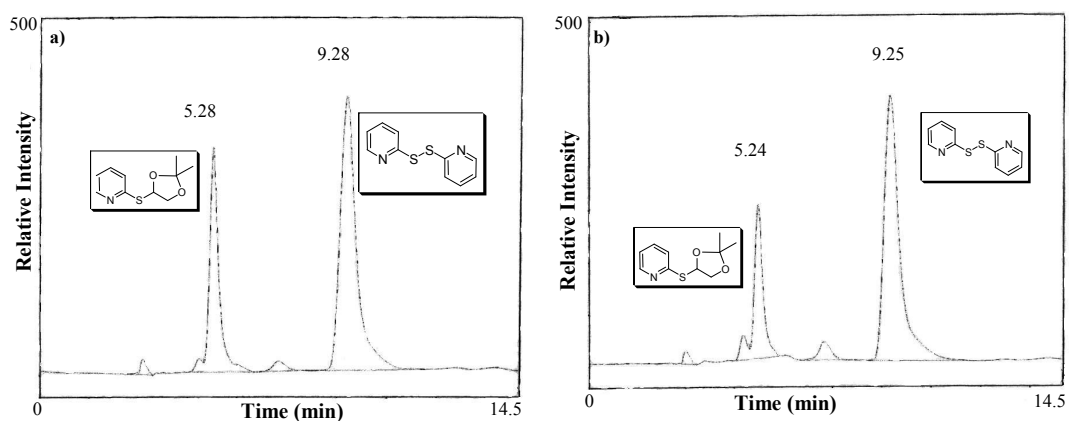

**Figure S4:** HPLC chromatograms after photolysis of **7** (1.57 mM) for 15 min: a) without TFA, b) with TFA (1.57 mM).

## Time resolved EPR

The time resolved EPR spectrum of **3** was observed upon photolysis (308 nm, XeCl excimer laser) of **7** in benzene. The EPR results show equivalence of the  $\beta$ -protons due to fast torsional oscillations. For **3** the literature reported  $g$  value is 2.0032.<sup>5</sup> The spectrum shows a doublet and a triplet, as expected for **3**. The  $g$  value is found to be 2.0035, which is in close agreement to the reported value, with a coupling constant of 11.2 G (d) and 27.2 G (t).

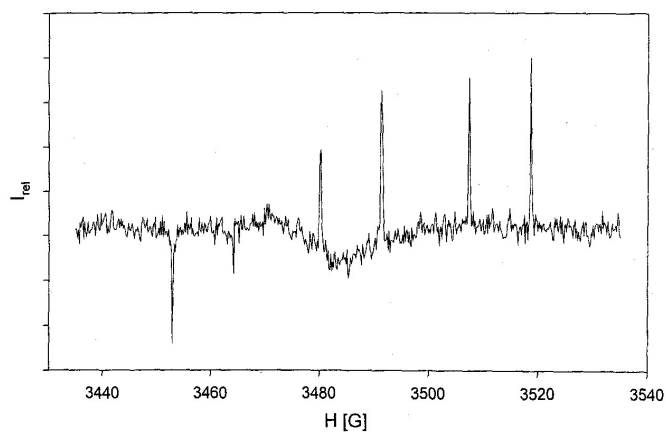

**Figure S5:** Time resolved EPR spectrum of **3** obtained by photolysis of **7** in benzene.

## Laser flash photolysis

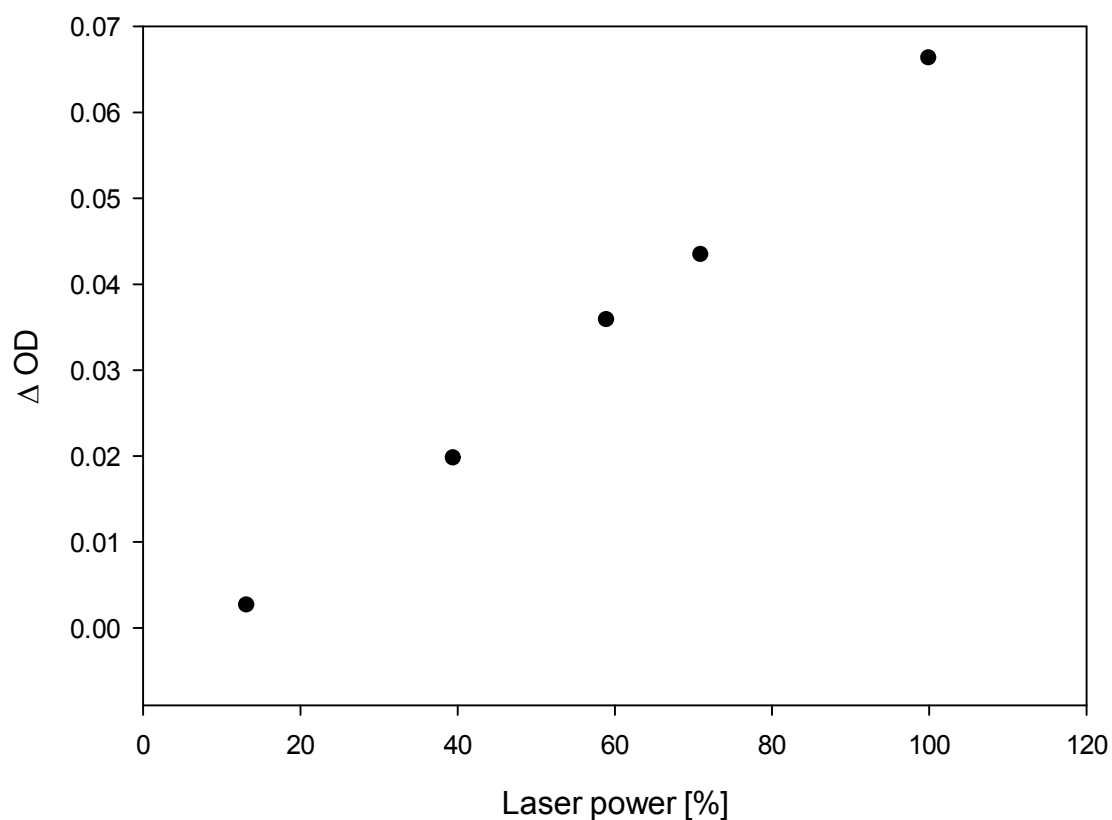

**Figure S6:** Plot of transient intensity @500 nm vs laser power (100% = 90 mJ / pulse), for the short-lived transient **C** observed after LFP (355 nm) of **7** in benzene.

## Computations on stationary points

Calculated geometries of stationary points:

Dioxolanyl radical 3, optimized geometry (M06-2X/cc-pVQZ):

|   |              |              |              |
|---|--------------|--------------|--------------|
| 6 | -0.574591000 | 0.002279000  | 0.013988000  |
| 8 | 0.282239000  | 0.096356000  | 1.130641000  |
| 6 | 1.609152000  | 0.223675000  | 0.642911000  |
| 6 | 1.507011000  | -0.305841000 | -0.757933000 |
| 8 | 0.213608000  | -0.646531000 | -0.991330000 |
| 1 | 1.936136000  | 1.268451000  | 0.676484000  |
| 1 | 2.270843000  | -0.360338000 | 1.284106000  |
| 1 | 2.244810000  | -0.909746000 | -1.259342000 |
| 6 | -0.977843000 | 1.380853000  | -0.482183000 |
| 1 | -1.539624000 | 1.899372000  | 0.291356000  |
| 1 | -1.592535000 | 1.292554000  | -1.375121000 |
| 1 | -0.090755000 | 1.962637000  | -0.727648000 |
| 6 | -1.747096000 | -0.879746000 | 0.359663000  |
| 1 | -2.325069000 | -0.421032000 | 1.158518000  |
| 1 | -1.385424000 | -1.849563000 | 0.690090000  |
| 1 | -2.384962000 | -1.008250000 | -0.511603000 |

E(M06-2X): -346.3343515

E(CCSD(T)/cc-pVTZ//M06-2X/cc-pVQZ): -345.7716978

Dioxolanyl radical 3, optimized geometry (M06-2X/cc-pVQZ, polarizable continuum model, benzene):

|   |              |              |              |
|---|--------------|--------------|--------------|
| 6 | -0.575695000 | 0.002652000  | 0.014103000  |
| 8 | 0.281833000  | 0.120980000  | 1.129019000  |
| 6 | 1.608865000  | 0.244826000  | 0.635236000  |
| 6 | 1.508790000  | -0.330876000 | -0.747104000 |
| 8 | 0.213870000  | -0.676785000 | -0.972060000 |
| 1 | 1.925193000  | 1.292977000  | 0.633972000  |
| 1 | 2.276899000  | -0.312248000 | 1.292696000  |
| 1 | 2.246870000  | -0.953346000 | -1.225055000 |
| 6 | -0.971286000 | 1.369223000  | -0.518848000 |
| 1 | -1.537238000 | 1.907820000  | 0.237717000  |
| 1 | -1.581928000 | 1.259805000  | -1.412198000 |
| 1 | -0.081840000 | 1.943542000  | -0.773270000 |
| 6 | -1.752956000 | -0.864410000 | 0.379819000  |
| 1 | -2.331452000 | -0.381370000 | 1.163824000  |
| 1 | -1.398542000 | -1.827748000 | 0.736593000  |
| 1 | -2.389883000 | -1.011487000 | -0.489192000 |

E(M06-2X): -346.3362931

Transition state 3 → 20, optimized geometry (M06-2X/cc-pVQZ):

|   |              |              |              |
|---|--------------|--------------|--------------|
| 6 | 0.764043000  | 0.095505000  | -0.154879000 |
| 8 | -0.145073000 | 0.404041000  | -1.077905000 |
| 6 | -1.496614000 | 0.626415000  | -0.529771000 |
| 6 | -1.649328000 | -0.556321000 | 0.350525000  |
| 8 | -0.678257000 | -0.747932000 | 1.104990000  |
| 1 | -1.493965000 | 1.572821000  | 0.013633000  |
| 1 | -2.175210000 | 0.671678000  | -1.374031000 |
| 1 | -2.386602000 | -1.334832000 | 0.141434000  |
| 6 | 1.227786000  | 1.145052000  | 0.792471000  |
| 1 | 2.026490000  | 1.737964000  | 0.338699000  |
| 1 | 1.613730000  | 0.683134000  | 1.698264000  |
| 1 | 0.418349000  | 1.817016000  | 1.066155000  |
| 6 | 1.647810000  | -1.043688000 | -0.506982000 |
| 1 | 2.381582000  | -0.747925000 | -1.263389000 |
| 1 | 1.052619000  | -1.857657000 | -0.915975000 |
| 1 | 2.187468000  | -1.392843000 | 0.370348000  |

E(M06-2X): -346.2956589

E(CCSD(T)/cc-pVTZ//M06-2X/cc-pVQZ): -345.7334140

Transition state 3 → 20, optimized geometry (M06-2X/cc-pVQZ, polarizable continuum model, benzene):

|   |              |              |              |
|---|--------------|--------------|--------------|
| 6 | 0.765790000  | 0.094799000  | -0.153548000 |
| 8 | -0.142700000 | 0.398879000  | -1.077026000 |
| 6 | -1.496159000 | 0.630325000  | -0.528944000 |
| 6 | -1.654991000 | -0.554658000 | 0.345065000  |
| 8 | -0.684739000 | -0.753607000 | 1.103667000  |
| 1 | -1.485875000 | 1.575015000  | 0.016268000  |
| 1 | -2.173407000 | 0.681590000  | -1.373526000 |
| 1 | -2.391828000 | -1.330607000 | 0.127585000  |
| 6 | 1.225284000  | 1.146097000  | 0.793654000  |
| 1 | 2.021350000  | 1.739403000  | 0.335942000  |
| 1 | 1.617714000  | 0.686828000  | 1.697913000  |
| 1 | 0.415217000  | 1.816935000  | 1.067576000  |
| 6 | 1.654607000  | -1.041045000 | -0.503768000 |
| 1 | 2.387542000  | -0.739834000 | -1.258638000 |
| 1 | 1.064906000  | -1.858165000 | -0.914436000 |
| 1 | 2.196701000  | -1.386445000 | 0.373439000  |

E(M06-2X): -346.2982552

Radical 20, optimized geometry (M06-2X/cc-pVQZ):

|   |              |              |              |
|---|--------------|--------------|--------------|
| 6 | -2.004921000 | 0.040699000  | -0.136116000 |
| 1 | -2.992343000 | 0.458456000  | 0.147554000  |
| 8 | -1.745959000 | -0.227440000 | -1.270234000 |
| 6 | -1.064633000 | -0.135084000 | 1.033842000  |
| 1 | -1.550986000 | -0.802979000 | 1.747822000  |
| 1 | -0.972492000 | 0.839348000  | 1.529995000  |
| 8 | 0.167395000  | -0.696330000 | 0.715457000  |
| 6 | 1.009163000  | 0.013175000  | -0.113766000 |
| 6 | 2.257448000  | -0.744111000 | -0.378237000 |
| 1 | 2.025226000  | -1.773027000 | -0.646896000 |
| 1 | 2.912188000  | -0.773107000 | 0.502557000  |
| 1 | 2.815193000  | -0.287576000 | -1.192779000 |
| 6 | 1.018367000  | 1.498485000  | -0.015485000 |
| 1 | 1.745344000  | 1.897917000  | -0.717949000 |
| 1 | 1.301012000  | 1.848280000  | 0.987241000  |
| 1 | 0.052820000  | 1.943874000  | -0.260764000 |

E(M06-2X): -346.3160194

E(CCSD(T)/cc-pVTZ//M06-2X/cc-pVQZ): -345.7532995

Radical 20, optimized geometry (M06-2X/cc-pVQZ, polarizable continuum model, benzene):

|   |              |              |              |
|---|--------------|--------------|--------------|
| 6 | -2.011616000 | 0.037192000  | -0.133215000 |
| 1 | -2.987813000 | 0.502165000  | 0.103543000  |
| 8 | -1.769069000 | -0.376734000 | -1.229109000 |
| 6 | -1.061938000 | -0.009740000 | 1.038790000  |
| 1 | -1.547725000 | -0.586143000 | 1.828457000  |
| 1 | -0.955697000 | 1.013065000  | 1.418737000  |
| 8 | 0.163327000  | -0.617227000 | 0.773136000  |
| 6 | 1.012954000  | -0.001328000 | -0.121518000 |
| 6 | 2.259980000  | -0.787361000 | -0.297181000 |
| 1 | 2.027775000  | -1.838073000 | -0.462292000 |
| 1 | 2.906271000  | -0.727544000 | 0.588296000  |
| 1 | 2.827343000  | -0.417018000 | -1.147940000 |
| 6 | 1.035944000  | 1.486720000  | -0.171341000 |
| 1 | 1.765721000  | 1.807256000  | -0.910367000 |

|   |             |             |              |
|---|-------------|-------------|--------------|
| 1 | 1.323821000 | 1.929135000 | 0.792276000  |
| 1 | 0.074289000 | 1.915944000 | -0.456134000 |

E(M06-2X): -346.3196703

Transition state 20 → 2 + 22 (M06-2X/cc-pVQZ):

|   |              |              |              |
|---|--------------|--------------|--------------|
| 6 | -1.788068000 | 0.459650000  | 0.032874000  |
| 1 | -2.509017000 | 0.994282000  | -0.603531000 |
| 8 | -1.193851000 | 1.032142000  | 0.932571000  |
| 6 | -1.440038000 | -0.901799000 | -0.332811000 |
| 1 | -1.968278000 | -1.355123000 | -1.158454000 |
| 1 | -1.217788000 | -1.566708000 | 0.491696000  |
| 8 | 0.117673000  | -0.669380000 | -1.007214000 |
| 6 | 0.997694000  | -0.177090000 | -0.226671000 |
| 6 | 1.372396000  | -0.886854000 | 1.030002000  |
| 1 | 1.272110000  | -1.964042000 | 0.914855000  |
| 1 | 2.393684000  | -0.648696000 | 1.319973000  |
| 6 | 1.619864000  | 1.137534000  | -0.553802000 |
| 1 | 1.064954000  | 1.625759000  | -1.349349000 |
| 1 | 2.654282000  | 0.999787000  | -0.878905000 |
| 1 | 1.637514000  | 1.780538000  | 0.327033000  |
| 1 | 0.710875000  | -0.556538000 | 1.836277000  |

E(M06-2X): -346.2959304

E(CCSD(T)/cc-pVTZ//M06-2X/cc-pVQZ): -345.7322772

Transition state 20 → 2 + 22 (M06-2X/cc-pVQZ, polarizable continuum model, benzene):

|   |              |              |              |
|---|--------------|--------------|--------------|
| 6 | -1.802524000 | 0.445734000  | 0.022843000  |
| 1 | -2.517668000 | 0.973331000  | -0.624379000 |
| 8 | -1.236551000 | 1.022879000  | 0.941621000  |
| 6 | -1.424928000 | -0.905275000 | -0.346939000 |
| 1 | -1.943583000 | -1.362768000 | -1.176229000 |
| 1 | -1.195772000 | -1.571281000 | 0.474858000  |
| 8 | 0.123191000  | -0.638280000 | -1.013686000 |
| 6 | 1.004937000  | -0.165982000 | -0.220361000 |
| 6 | 1.372403000  | -0.902835000 | 1.021840000  |
| 1 | 1.276621000  | -1.977530000 | 0.882378000  |
| 1 | 2.390213000  | -0.666427000 | 1.324126000  |
| 6 | 1.641990000  | 1.145009000  | -0.530044000 |
| 1 | 1.073816000  | 1.667207000  | -1.294260000 |
| 1 | 2.662207000  | 0.994663000  | -0.892611000 |
| 1 | 1.705461000  | 1.762165000  | 0.366693000  |
| 1 | 0.704320000  | -0.596059000 | 1.831912000  |

E(M06-2X): -346.2990042

Transition state 3 → 21, optimized geometry (M06-2X/cc-pVQZ):

|   |              |              |              |
|---|--------------|--------------|--------------|
| 6 | -0.615665000 | 0.048571000  | 0.084889000  |
| 8 | 0.037452000  | 0.209774000  | 1.261429000  |
| 6 | 1.949448000  | 0.423832000  | 0.327626000  |
| 6 | 1.527105000  | -0.612322000 | -0.455879000 |
| 8 | 0.276095000  | -0.776426000 | -0.803332000 |
| 1 | 1.512485000  | 1.405625000  | 0.299787000  |
| 1 | 2.901044000  | 0.329916000  | 0.830370000  |
| 1 | 2.179429000  | -1.422202000 | -0.759110000 |
| 6 | -0.937810000 | 1.329654000  | -0.677159000 |
| 1 | -1.569735000 | 1.955112000  | -0.050414000 |
| 1 | -1.467922000 | 1.100298000  | -1.599372000 |
| 1 | -0.040606000 | 1.887804000  | -0.930995000 |
| 6 | -1.852140000 | -0.806044000 | 0.299569000  |
| 1 | -2.562848000 | -0.257852000 | 0.913828000  |

|   |              |              |              |
|---|--------------|--------------|--------------|
| 1 | -1.569476000 | -1.721072000 | 0.811912000  |
| 1 | -2.316372000 | -1.046552000 | -0.655056000 |

E(M06-2X): -346.2818005

E(CCSD(T)/cc-pVTZ//M06-2X/cc-pVQZ): -345.7198528

Transition state 3 → 21, optimized geometry (M06-2X/cc-pVQZ, polarizable continuum model, benzene):

|   |              |              |              |
|---|--------------|--------------|--------------|
| 6 | -0.618622000 | 0.049812000  | 0.086130000  |
| 8 | 0.024850000  | 0.210534000  | 1.268683000  |
| 6 | 1.961700000  | 0.422925000  | 0.322379000  |
| 6 | 1.528937000  | -0.616699000 | -0.450595000 |
| 8 | 0.276228000  | -0.786324000 | -0.787901000 |
| 1 | 1.516766000  | 1.401281000  | 0.304307000  |
| 1 | 2.922074000  | 0.331995000  | 0.808725000  |
| 1 | 2.181604000  | -1.422849000 | -0.762771000 |
| 6 | -0.925383000 | 1.329916000  | -0.683324000 |
| 1 | -1.563232000 | 1.959380000  | -0.066569000 |
| 1 | -1.446846000 | 1.099208000  | -1.610050000 |
| 1 | -0.023916000 | 1.884583000  | -0.928797000 |
| 6 | -1.863712000 | -0.795835000 | 0.288947000  |
| 1 | -2.577454000 | -0.241589000 | 0.894176000  |
| 1 | -1.595062000 | -1.713858000 | 0.803874000  |
| 1 | -2.320067000 | -1.032542000 | -0.670369000 |

E(M06-2X): -346.2849989

Radical 21, optimized geometry (M06-2X/cc-pVQZ):

|   |              |              |              |
|---|--------------|--------------|--------------|
| 1 | 1.742927000  | 1.137065000  | 0.831101000  |
| 6 | 2.243396000  | 0.357116000  | 0.279823000  |
| 1 | 3.318649000  | 0.394550000  | 0.211958000  |
| 6 | 1.618226000  | -0.660633000 | -0.294598000 |
| 1 | 2.170911000  | -1.439109000 | -0.802786000 |
| 8 | 0.291488000  | -0.931468000 | -0.359450000 |
| 6 | -0.655035000 | 0.047398000  | 0.066031000  |
| 6 | -2.002685000 | -0.694806000 | 0.088531000  |
| 1 | -2.156593000 | -1.130927000 | -0.894915000 |
| 1 | -2.801987000 | 0.000784000  | 0.322335000  |
| 1 | -1.966984000 | -1.486126000 | 0.831487000  |
| 6 | -0.690314000 | 1.219990000  | -0.923770000 |
| 1 | -0.935470000 | 0.831924000  | -1.909271000 |
| 1 | 0.275789000  | 1.712629000  | -0.966366000 |
| 1 | -1.446582000 | 1.933384000  | -0.610076000 |
| 8 | -0.451762000 | 0.485397000  | 1.320754000  |

E(M06-2X): -346.3038954

E(CCSD(T)/cc-pVTZ//M06-2X/cc-pVQZ): -345.7415363

Radical 21, optimized geometry (M06-2X/cc-pVQZ, polarizable continuum model, benzene):

|   |              |              |              |
|---|--------------|--------------|--------------|
| 1 | 1.741620000  | 1.145269000  | 0.818833000  |
| 6 | 2.243604000  | 0.358933000  | 0.277830000  |
| 1 | 3.319436000  | 0.394035000  | 0.215582000  |
| 6 | 1.619860000  | -0.660062000 | -0.296933000 |
| 1 | 2.174614000  | -1.440761000 | -0.799562000 |
| 8 | 0.292804000  | -0.929211000 | -0.367325000 |
| 6 | -0.655080000 | 0.047161000  | 0.066385000  |
| 6 | -2.004863000 | -0.693474000 | 0.079473000  |
| 1 | -2.159267000 | -1.113053000 | -0.911069000 |
| 1 | -2.802343000 | 0.000908000  | 0.322120000  |
| 1 | -1.971922000 | -1.495715000 | 0.810729000  |
| 6 | -0.690775000 | 1.230501000  | -0.910057000 |
| 1 | -0.931922000 | 0.852219000  | -1.900212000 |
| 1 | 0.272284000  | 1.729426000  | -0.943996000 |

|   |              |             |              |
|---|--------------|-------------|--------------|
| 1 | -1.452223000 | 1.936027000 | -0.591329000 |
| 8 | -0.451149000 | 0.465872000 | 1.327165000  |

E(M06-2X): -346.306014

Transition state 21 → 2 + 22, optimized geometry (M06-2X / cc-pVQZ):

|   |              |              |              |
|---|--------------|--------------|--------------|
| 1 | 1.774629000  | 1.469119000  | 0.000000000  |
| 6 | 2.296792000  | 0.533383000  | 0.000000000  |
| 1 | 3.375987000  | 0.513755000  | 0.000001000  |
| 6 | 1.665394000  | -0.692078000 | -0.000001000 |
| 1 | 2.295030000  | -1.581572000 | -0.000002000 |
| 8 | 0.415090000  | -0.964928000 | -0.000002000 |
| 6 | -0.754540000 | 0.228930000  | 0.000000000  |
| 6 | -1.486397000 | -0.205015000 | 1.283258000  |
| 1 | -1.749165000 | -1.257704000 | 1.258052000  |
| 1 | -2.386976000 | 0.401887000  | 1.345942000  |
| 1 | -0.854450000 | 0.007064000  | 2.140768000  |
| 6 | -1.486399000 | -0.205012000 | -1.283257000 |
| 1 | -1.749167000 | -1.257701000 | -1.258054000 |
| 1 | -0.854454000 | 0.007069000  | -2.140767000 |
| 1 | -2.386979000 | 0.401890000  | -1.345938000 |
| 8 | -0.274284000 | 1.381797000  | 0.000001000  |

E(M06-2X): -346.2827097

E(CCSD(T)/cc-pVTZ//M06-2X/cc-pVQZ): -345.7200203

Transition state 21 → 2 + 22, optimized geometry (M06-2X / cc-pVQZ, polarizable continuum model, benzene):

|   |              |              |              |
|---|--------------|--------------|--------------|
| 1 | 1.791472000  | 1.463645000  | -0.000324000 |
| 6 | 2.303855000  | 0.522864000  | -0.000231000 |
| 1 | 3.382525000  | 0.490467000  | -0.000293000 |
| 6 | 1.658425000  | -0.695540000 | -0.000027000 |
| 1 | 2.274592000  | -1.592989000 | 0.000050000  |
| 8 | 0.403283000  | -0.954329000 | 0.000092000  |
| 6 | -0.743757000 | 0.221669000  | 0.000022000  |
| 6 | -1.488698000 | -0.200700000 | 1.281015000  |
| 1 | -1.765137000 | -1.250054000 | 1.256501000  |
| 1 | -2.382639000 | 0.416126000  | 1.338376000  |
| 1 | -0.858553000 | 0.003717000  | 2.142046000  |
| 6 | -1.488902000 | -0.201048000 | -1.280737000 |
| 1 | -1.765334000 | -1.250396000 | -1.255897000 |
| 1 | -0.858896000 | 0.003141000  | -2.141923000 |
| 1 | -2.382855000 | 0.415761000  | -1.338120000 |
| 8 | -0.263373000 | 1.381468000  | -0.000175000 |

E(M06-2X): -346.2857094

Acetone 2, optimized geometry (M06-2X/cc-pVQZ):

|   |              |              |              |
|---|--------------|--------------|--------------|
| 6 | 0.000000000  | 0.000000000  | 0.186637000  |
| 8 | 0.000000000  | 0.000000000  | 1.389338000  |
| 6 | 0.000000000  | 1.282798000  | -0.610224000 |
| 1 | -0.875756000 | 1.317296000  | -1.258325000 |
| 1 | 0.876864000  | 1.318058000  | -1.256796000 |
| 1 | -0.000895000 | 2.136352000  | 0.059203000  |
| 6 | 0.000000000  | -1.282798000 | -0.610224000 |
| 1 | 0.000895000  | -2.136352000 | 0.059203000  |
| 1 | 0.875756000  | -1.317296000 | -1.258325000 |
| 1 | -0.876864000 | -1.318058000 | -1.256796000 |

E(M06-2X): -193.1502932

E(CCSD(T)/cc-pVTZ//M06-2X/cc-pVQZ): -192.8362077

Acetone 2, optimized geometry (M06-2X/cc-pVQZ, polarizable continuum model, benzene):

|   |              |              |              |
|---|--------------|--------------|--------------|
| 6 | 0.000000000  | 0.000000000  | 0.185097000  |
| 8 | 0.000000000  | 0.000000000  | 1.390878000  |
| 6 | 0.000000000  | 1.281076000  | -0.610114000 |
| 1 | -0.822442000 | 1.279476000  | -1.324740000 |
| 1 | 0.923170000  | 1.348463000  | -1.186226000 |
| 1 | -0.081283000 | 2.135853000  | 0.052849000  |
| 6 | 0.000000000  | -1.281076000 | -0.610114000 |
| 1 | 0.081283000  | -2.135853000 | 0.052849000  |
| 1 | 0.822442000  | -1.279476000 | -1.324740000 |
| 1 | -0.923170000 | -1.348463000 | -1.186226000 |

E(M06-2X): -193.1532946

Vinyloxy radical 22, optimized geometry (M06-2X/cc-pVQZ):

|   |              |              |             |
|---|--------------|--------------|-------------|
| 1 | 0.791286000  | -1.587072000 | 0.000000000 |
| 6 | 1.047636000  | -0.538891000 | 0.000000000 |
| 1 | 2.083916000  | -0.239571000 | 0.000000000 |
| 6 | 0.000000000  | 0.429059000  | 0.000000000 |
| 1 | 0.300916000  | 1.488268000  | 0.000000000 |
| 8 | -1.182742000 | 0.124670000  | 0.000000000 |

E(M06-2X): -153.1688471

E(CCSD(T)/cc-pVTZ//M06-2X/cc-pVQZ): -152.9242974

Vinyloxy radical 22, optimized geometry (M06-2X/cc-pVQZ, polarizable continuum model, benzene):

|   |              |              |             |
|---|--------------|--------------|-------------|
| 1 | 0.800752000  | -1.584911000 | 0.000000000 |
| 6 | 1.049909000  | -0.534948000 | 0.000000000 |
| 1 | 2.083945000  | -0.228904000 | 0.000000000 |
| 6 | 0.000000000  | 0.428351000  | 0.000000000 |
| 1 | 0.295846000  | 1.487559000  | 0.000000000 |
| 8 | -1.185000000 | 0.120730000  | 0.000000000 |

E(M06-2X): -153.1718991

Complex of vinyloxy radical 22 and benzene, optimized geometry (M06-2X/cc-pVTZ):

|   |              |              |              |
|---|--------------|--------------|--------------|
| 6 | -3.138468000 | 1.094951000  | -0.000224000 |
| 1 | -2.952694000 | 2.158447000  | -0.000515000 |
| 1 | -4.153752000 | 0.726415000  | 0.000068000  |
| 6 | -2.061993000 | 0.157449000  | -0.000222000 |
| 1 | -1.038372000 | 0.563401000  | -0.000517000 |
| 8 | -2.247477000 | -1.053190000 | 0.000093000  |
| 1 | 1.364049000  | -0.059997000 | 2.469695000  |
| 6 | 1.366354000  | -0.061188000 | 1.387969000  |
| 6 | 1.366568000  | -0.062401000 | -1.387830000 |
| 6 | 1.775627000  | 1.071273000  | 0.693591000  |
| 6 | 0.955875000  | -1.191085000 | 0.694779000  |
| 6 | 0.955981000  | -1.191691000 | -0.693717000 |
| 6 | 1.775734000  | 1.070667000  | -0.694377000 |
| 1 | 2.095052000  | 1.951854000  | 1.234611000  |
| 1 | 0.615805000  | -2.065002000 | 1.232420000  |
| 1 | 0.615992000  | -2.066076000 | -1.230648000 |
| 1 | 2.095243000  | 1.950775000  | -1.236116000 |
| 1 | 1.364428000  | -0.062149000 | -2.469556000 |

E(M06-2X): -385.386763

Complex of vinyloxy radical 22 and diphenylether (M06-2X/cc-pVTZ):

|   |             |             |              |
|---|-------------|-------------|--------------|
| 6 | 3.485710000 | 2.157388000 | -0.265896000 |
| 1 | 4.265718000 | 1.501033000 | -0.620105000 |



|   |              |              |              |
|---|--------------|--------------|--------------|
| 1 | 3.736509000  | 3.038070000  | 0.307090000  |
| 6 | 2.113370000  | 1.881731000  | -0.547587000 |
| 1 | 1.899089000  | 0.963207000  | -1.115933000 |
| 8 | 1.202953000  | 2.612794000  | -0.178665000 |
| 1 | 4.074456000  | -1.086792000 | 1.139056000  |
| 6 | 3.059819000  | -1.141439000 | 0.769874000  |
| 6 | 0.447750000  | -1.287058000 | -0.167362000 |
| 6 | 2.790563000  | -1.723394000 | -0.462748000 |
| 6 | 2.011156000  | -0.640349000 | 1.529179000  |
| 6 | 0.703497000  | -0.709601000 | 1.071123000  |
| 6 | 1.489908000  | -1.795655000 | -0.935021000 |
| 1 | 3.596580000  | -2.125324000 | -1.061868000 |
| 1 | 2.207842000  | -0.188466000 | 2.492040000  |
| 1 | -0.109122000 | -0.316551000 | 1.664530000  |
| 1 | 1.257004000  | -2.245681000 | -1.889846000 |
| 8 | -0.810027000 | -1.446114000 | -0.677493000 |
| 6 | -1.826419000 | -0.587597000 | -0.313095000 |
| 6 | -3.977833000 | 1.043148000  | 0.291820000  |
| 6 | -3.061752000 | -1.156285000 | -0.047238000 |
| 6 | -1.649290000 | 0.788737000  | -0.285543000 |
| 6 | -2.732939000 | 1.597013000  | 0.023652000  |
| 6 | -4.138631000 | -0.334380000 | 0.251202000  |
| 1 | -3.161400000 | -2.231930000 | -0.085017000 |
| 1 | -0.681775000 | 1.229526000  | -0.489135000 |
| 1 | -2.595920000 | 2.669443000  | 0.049351000  |
| 1 | -5.104567000 | -0.775303000 | 0.456450000  |
| 1 | -4.817271000 | 1.681779000  | 0.528491000  |

E(M06-2X) : -691.6462595

Carbonyloxy radical 4, optimized geometry (M06-2X/cc-pVQZ) :

|   |              |              |              |
|---|--------------|--------------|--------------|
| 6 | -0.573734000 | 0.006114000  | 0.012400000  |
| 8 | 0.286223000  | 0.236103000  | 1.105227000  |
| 6 | 1.604477000  | 0.330890000  | 0.593740000  |
| 6 | 1.532819000  | -0.552558000 | -0.608521000 |
| 8 | 0.228207000  | -0.674889000 | -0.967326000 |
| 1 | 1.854515000  | 1.373702000  | 0.351606000  |
| 1 | 2.298745000  | -0.018147000 | 1.356015000  |
| 1 | 2.254637000  | -0.604565000 | -1.407483000 |
| 6 | -1.051063000 | 1.314475000  | -0.593117000 |
| 1 | -1.647451000 | 1.860188000  | 0.134908000  |
| 1 | -1.652924000 | 1.119452000  | -1.477965000 |
| 1 | -0.198048000 | 1.926326000  | -0.881798000 |
| 6 | -1.698161000 | -0.898087000 | 0.452000000  |
| 1 | -2.279119000 | -0.406962000 | 1.229429000  |
| 1 | -1.283889000 | -1.823109000 | 0.844139000  |
| 1 | -2.347927000 | -1.121597000 | -0.391081000 |

E(M06-2X) : -346.3338106

Carbonyloxy radical 4, optimized geometry (M06-2X/cc-pVQZ, polarizable continuum model, benzene):

|   |              |              |              |
|---|--------------|--------------|--------------|
| 6 | -1.347935000 | 0.161587000  | -0.041033000 |
| 8 | -0.769743000 | -0.615514000 | -1.072008000 |
| 6 | 0.143434000  | -1.499553000 | -0.462186000 |
| 6 | 0.723945000  | -0.620246000 | 0.643531000  |
| 8 | -0.336356000 | 0.236009000  | 0.983521000  |
| 1 | -0.357576000 | -2.368510000 | -0.031901000 |
| 1 | 0.879055000  | -1.821696000 | -1.192321000 |
| 1 | 1.058465000  | -1.188487000 | 1.510526000  |
| 6 | -2.574666000 | -0.514813000 | 0.541166000  |
| 1 | -3.356483000 | -0.571413000 | -0.212834000 |
| 1 | -2.940440000 | 0.056635000  | 1.391056000  |
| 1 | -2.333540000 | -1.520472000 | 0.879514000  |
| 6 | -1.629989000 | 1.544666000  | -0.575235000 |
| 1 | -2.359952000 | 1.486713000  | -1.379443000 |
| 1 | -0.711413000 | 1.984878000  | -0.954989000 |
| 1 | -2.028143000 | 2.171563000  | 0.219089000  |
| 6 | 1.919087000  | 0.166449000  | 0.131577000  |
| 8 | 2.956983000  | -0.301550000 | -0.250927000 |
| 8 | 1.742463000  | 1.473836000  | 0.132463000  |

E(M06-2X): -534.9049057

Transition state for decarboxylation of 4, optimized geometry (M06-2X/cc-pVQZ):

|   |              |              |              |
|---|--------------|--------------|--------------|
| 6 | -1.364651000 | 0.147303000  | -0.040958000 |
| 8 | -0.761803000 | -0.621185000 | -1.064415000 |
| 6 | 0.185716000  | -1.463394000 | -0.452788000 |
| 6 | 0.716478000  | -0.562725000 | 0.657174000  |
| 8 | -0.386418000 | 0.201320000  | 1.016191000  |
| 1 | -0.280321000 | -2.350908000 | -0.015219000 |
| 1 | 0.936039000  | -1.759202000 | -1.178011000 |
| 1 | 1.112300000  | -1.096990000 | 1.520162000  |
| 6 | -2.607657000 | -0.531960000 | 0.499657000  |
| 1 | -3.372782000 | -0.569244000 | -0.272427000 |
| 1 | -2.988468000 | 0.022263000  | 1.354379000  |
| 1 | -2.376745000 | -1.545920000 | 0.820092000  |
| 6 | -1.626794000 | 1.537407000  | -0.568890000 |
| 1 | -2.318424000 | 1.486374000  | -1.406891000 |
| 1 | -0.694367000 | 1.985724000  | -0.901578000 |
| 1 | -2.062312000 | 2.153185000  | 0.214538000  |
| 6 | 1.965843000  | 0.219712000  | 0.108538000  |
| 8 | 2.949937000  | -0.371786000 | -0.238465000 |
| 8 | 1.752217000  | 1.491233000  | 0.117759000  |

E(M06-2X): -534.8998848

Transition state for decarboxylation of 4, optimized geometry (M06-2X/cc-pVQZ, polarizable continuum model, benzene):

|   |              |              |              |
|---|--------------|--------------|--------------|
| 6 | -1.368985000 | 0.145540000  | -0.033547000 |
| 8 | -0.762004000 | -0.588994000 | -1.079927000 |
| 6 | 0.186321000  | -1.447645000 | -0.490589000 |
| 6 | 0.720363000  | -0.574461000 | 0.640455000  |
| 8 | -0.378183000 | 0.189558000  | 1.014793000  |
| 1 | -0.278817000 | -2.344103000 | -0.072666000 |
| 1 | 0.932347000  | -1.728684000 | -1.226063000 |
| 1 | 1.114137000  | -1.130985000 | 1.490103000  |
| 6 | -2.596201000 | -0.565051000 | 0.501987000  |
| 1 | -3.367252000 | -0.595943000 | -0.264453000 |
| 1 | -2.978881000 | -0.034443000 | 1.370746000  |
| 1 | -2.348373000 | -1.582203000 | 0.798613000  |
| 6 | -1.656240000 | 1.543972000  | -0.523776000 |
| 1 | -2.360341000 | 1.504545000  | -1.351919000 |
| 1 | -0.734918000 | 2.013017000  | -0.859211000 |
| 1 | -2.088966000 | 2.134364000  | 0.280392000  |
| 6 | 1.968938000  | 0.218655000  | 0.114688000  |

|   |             |              |              |
|---|-------------|--------------|--------------|
| 8 | 2.979083000 | -0.356236000 | -0.190189000 |
| 8 | 1.734339000 | 1.485470000  | 0.077716000  |

E(M06-2X): -534.9035696

Complex of thiyl radical 5 and benzene, optimized geometry (M06-2X/cc-pVTZ):

|    |              |              |              |
|----|--------------|--------------|--------------|
| 1  | -2.229031000 | -1.547712000 | -2.075537000 |
| 6  | -2.052978000 | -0.932555000 | -1.201880000 |
| 7  | -1.595616000 | 0.654909000  | 1.049671000  |
| 6  | -1.249954000 | 0.193447000  | -1.284746000 |
| 6  | -2.617715000 | -1.252378000 | 0.019062000  |
| 6  | -2.357123000 | -0.423332000 | 1.111883000  |
| 6  | -1.041241000 | 0.967135000  | -0.135514000 |
| 1  | -0.778507000 | 0.486564000  | -2.212676000 |
| 1  | -3.251281000 | -2.121503000 | 0.137997000  |
| 1  | -2.790590000 | -0.648849000 | 2.081089000  |
| 16 | -0.038406000 | 2.380035000  | -0.224392000 |
| 1  | 3.240557000  | 1.196040000  | -0.499321000 |
| 6  | 2.624889000  | 0.355024000  | -0.204322000 |
| 6  | 1.030396000  | -1.790660000 | 0.550579000  |
| 6  | 2.293132000  | -0.623514000 | -1.133672000 |
| 6  | 2.160878000  | 0.259038000  | 1.102566000  |
| 6  | 1.362504000  | -0.813956000 | 1.478996000  |
| 6  | 1.497637000  | -1.696323000 | -0.755539000 |
| 1  | 2.653015000  | -0.546597000 | -2.152404000 |
| 1  | 2.411846000  | 1.026469000  | 1.824255000  |
| 1  | 0.988736000  | -0.879362000 | 2.493234000  |
| 1  | 1.234941000  | -2.457896000 | -1.480194000 |
| 1  | 0.401580000  | -2.623627000 | 0.841662000  |

E(M06-2X): -878.0533031

Radical 23, optimized geometry (M06-2X/6-311++G(2df,p), polarizable continuum model, benzene)

|    |              |              |              |
|----|--------------|--------------|--------------|
| 1  | 5.534225000  | -2.913563000 | 0.449973000  |
| 6  | 4.545636000  | -2.481322000 | 0.359382000  |
| 7  | 2.055533000  | -1.384080000 | 0.115008000  |
| 6  | 4.391261000  | -1.210364000 | -0.169855000 |
| 6  | 3.428281000  | -3.185197000 | 0.783659000  |
| 6  | 2.182782000  | -2.593630000 | 0.640859000  |
| 6  | 3.106580000  | -0.683481000 | -0.283063000 |
| 1  | 5.240091000  | -0.619071000 | -0.484881000 |
| 1  | 3.511377000  | -4.173905000 | 1.213346000  |
| 1  | 1.262350000  | -3.075843000 | 0.945896000  |
| 16 | 2.856669000  | 0.931068000  | -0.968878000 |
| 8  | 0.288260000  | -1.040646000 | -1.019195000 |
| 6  | -0.702958000 | -1.252357000 | -0.222186000 |
| 8  | -0.688542000 | -1.590294000 | 0.939782000  |
| 6  | -2.044438000 | -1.045425000 | -0.976987000 |
| 6  | -2.952881000 | -2.281709000 | -0.851164000 |
| 1  | -2.991017000 | -2.874031000 | -1.762634000 |
| 1  | -2.639130000 | -2.905455000 | -0.010193000 |
| 1  | -1.854511000 | -0.775669000 | -2.016458000 |
| 6  | 2.022902000  | 1.757937000  | 0.448065000  |
| 1  | 2.574528000  | 1.462175000  | 1.339403000  |
| 6  | 2.047374000  | 3.279980000  | 0.178944000  |
| 1  | 2.298127000  | 3.497764000  | -0.865154000 |
| 1  | 2.746906000  | 3.802992000  | 0.828263000  |
| 8  | 0.680068000  | 1.452637000  | 0.634357000  |
| 8  | 0.736919000  | 3.688922000  | 0.485769000  |
| 6  | -0.109962000 | 2.576625000  | 0.248361000  |
| 6  | -1.303129000 | 2.659917000  | 1.166105000  |
| 1  | -1.909475000 | 3.527025000  | 0.902350000  |
| 1  | -0.961795000 | 2.755268000  | 2.195986000  |
| 1  | -1.901127000 | 1.755843000  | 1.055024000  |
| 6  | -0.495093000 | 2.476304000  | -1.218997000 |
| 1  | -1.037589000 | 3.374460000  | -1.516174000 |

|   |              |              |              |
|---|--------------|--------------|--------------|
| 1 | -1.138241000 | 1.608537000  | -1.363087000 |
| 1 | 0.386545000  | 2.363464000  | -1.850820000 |
| 8 | -2.781684000 | -0.013987000 | -0.359596000 |
| 8 | -4.226477000 | -1.715926000 | -0.624689000 |
| 6 | -4.018703000 | -0.541738000 | 0.131755000  |
| 6 | -3.897384000 | -0.846976000 | 1.615490000  |
| 1 | -3.064778000 | -1.525268000 | 1.798138000  |
| 1 | -4.826037000 | -1.289935000 | 1.977228000  |
| 1 | -3.705994000 | 0.076277000  | 2.163838000  |
| 6 | -5.120670000 | 0.442469000  | -0.181449000 |
| 1 | -5.162300000 | 0.613856000  | -1.256164000 |
| 1 | -4.925717000 | 1.386339000  | 0.327995000  |
| 1 | -6.077813000 | 0.048352000  | 0.160180000  |

E(M06-2X) : -1527.0782942

Radical 24, optimized geometry (M06-2X/6-311++G(2df,p), polarizable continuum model, benzene)

|    |              |              |              |
|----|--------------|--------------|--------------|
| 1  | 3.970247000  | -3.277289000 | -0.153668000 |
| 6  | 3.060716000  | -2.691142000 | -0.110946000 |
| 7  | 0.767320000  | -1.200654000 | -0.017059000 |
| 6  | 3.048329000  | -1.392239000 | -0.592795000 |
| 6  | 1.903342000  | -3.225272000 | 0.434599000  |
| 6  | 0.763408000  | -2.436366000 | 0.463113000  |
| 6  | 1.863037000  | -0.660459000 | -0.534701000 |
| 1  | 3.935390000  | -0.930984000 | -1.004715000 |
| 1  | 1.874780000  | -4.231653000 | 0.829255000  |
| 1  | -0.177277000 | -2.778518000 | 0.876186000  |
| 16 | 1.817082000  | 0.993975000  | -1.175037000 |
| 6  | 1.598080000  | 2.016285000  | 0.360482000  |
| 6  | 2.635925000  | 1.625464000  | 1.404810000  |
| 1  | 3.647763000  | 1.700968000  | 1.003183000  |
| 1  | 2.475888000  | 0.606657000  | 1.762904000  |
| 1  | 2.551420000  | 2.297539000  | 2.263238000  |
| 6  | 1.843018000  | 3.442441000  | -0.130584000 |
| 1  | 2.854535000  | 3.559399000  | -0.522452000 |
| 1  | 1.713804000  | 4.132770000  | 0.706230000  |
| 1  | 1.130975000  | 3.718209000  | -0.910965000 |
| 6  | 0.187893000  | 1.884665000  | 0.922413000  |
| 1  | -0.008134000 | 0.876230000  | 1.286872000  |
| 1  | -0.555381000 | 2.127100000  | 0.161090000  |
| 1  | 0.073943000  | 2.580701000  | 1.759190000  |
| 8  | -1.132211000 | -0.471622000 | -0.761928000 |
| 6  | -1.974013000 | -0.551515000 | 0.215366000  |
| 8  | -1.773185000 | -1.011210000 | 1.321855000  |
| 6  | -3.363713000 | 0.027215000  | -0.170658000 |
| 6  | -4.349472000 | -1.143419000 | -0.123016000 |
| 1  | -5.357760000 | -0.777238000 | -0.330711000 |
| 1  | -4.341931000 | -1.612590000 | 0.860843000  |
| 1  | -4.100176000 | -1.897190000 | -0.873024000 |
| 6  | -3.719106000 | 1.058933000  | 0.902968000  |
| 1  | -4.717167000 | 1.456893000  | 0.704274000  |
| 1  | -3.012856000 | 1.892293000  | 0.897465000  |
| 1  | -3.709037000 | 0.603522000  | 1.892530000  |
| 6  | -3.377594000 | 0.676538000  | -1.552453000 |
| 1  | -4.374858000 | 1.076149000  | -1.751008000 |
| 1  | -3.134083000 | -0.042901000 | -2.334791000 |
| 1  | -2.660575000 | 1.496804000  | -1.612926000 |

E(M06-2X) : -1149.9900933

Radical 24, complex with benzene, optimized geometry (M06-2X/6-311++G(2df,p), polarizable continuum model, benzene)

|   |              |              |             |
|---|--------------|--------------|-------------|
| 1 | -2.986546000 | 0.917152000  | 3.039658000 |
| 6 | -2.141815000 | 0.581518000  | 2.456282000 |
| 7 | 0.030794000  | -0.276932000 | 0.940075000 |
| 6 | -1.130436000 | 1.464042000  | 2.090089000 |

|    |              |              |              |
|----|--------------|--------------|--------------|
| 6  | -2.020334000 | -0.769177000 | 2.056884000  |
| 6  | -0.945302000 | -1.180400000 | 1.345148000  |
| 6  | -0.035687000 | 1.065114000  | 1.353949000  |
| 1  | -1.180379000 | 2.509798000  | 2.366472000  |
| 1  | -2.786185000 | -1.494410000 | 2.296658000  |
| 1  | -0.796113000 | -2.191885000 | 0.996293000  |
| 16 | 1.233449000  | 2.165765000  | 0.860151000  |
| 6  | 0.686723000  | 2.757426000  | -0.818215000 |
| 6  | -0.654773000 | 3.468860000  | -0.711094000 |
| 1  | -0.590669000 | 4.325002000  | -0.037368000 |
| 1  | -1.429526000 | 2.795448000  | -0.339923000 |
| 1  | -0.959565000 | 3.826430000  | -1.699174000 |
| 6  | 1.782583000  | 3.733186000  | -1.237767000 |
| 1  | 1.856633000  | 4.569882000  | -0.540514000 |
| 1  | 1.549583000  | 4.131952000  | -2.228249000 |
| 1  | 2.753022000  | 3.235349000  | -1.289550000 |
| 6  | 0.609023000  | 1.585298000  | -1.786906000 |
| 1  | -0.097837000 | 0.829846000  | -1.442264000 |
| 1  | 1.582764000  | 1.104517000  | -1.898407000 |
| 1  | 0.285443000  | 1.941657000  | -2.770143000 |
| 8  | 1.342943000  | -0.814991000 | 0.998992000  |
| 6  | 1.740779000  | -1.417399000 | -0.156932000 |
| 8  | 1.002348000  | -1.618925000 | -1.074764000 |
| 6  | 3.214857000  | -1.781058000 | -0.081756000 |
| 6  | 3.465810000  | -2.656974000 | 1.152569000  |
| 1  | 4.518968000  | -2.943354000 | 1.175769000  |
| 1  | 2.866597000  | -3.569200000 | 1.116042000  |
| 1  | 3.231769000  | -2.123345000 | 2.073160000  |
| 6  | 3.590920000  | -2.535500000 | -1.353367000 |
| 1  | 4.651405000  | -2.791089000 | -1.319601000 |
| 1  | 3.406342000  | -1.926731000 | -2.238957000 |
| 1  | 3.013901000  | -3.455891000 | -1.450945000 |
| 6  | 4.022370000  | -0.479580000 | 0.025343000  |
| 1  | 5.086374000  | -0.723226000 | 0.052997000  |
| 1  | 3.761820000  | 0.075194000  | 0.926155000  |
| 1  | 3.841563000  | 0.166639000  | -0.836728000 |
| 1  | -4.381486000 | -3.269353000 | -0.365046000 |
| 6  | -3.957221000 | -2.310980000 | -0.639810000 |
| 6  | -2.874693000 | 0.145046000  | -1.350471000 |
| 6  | -2.782392000 | -2.257093000 | -1.378585000 |
| 6  | -4.588474000 | -1.135522000 | -0.251268000 |
| 6  | -4.046486000 | 0.092687000  | -0.606275000 |
| 6  | -2.238989000 | -1.028672000 | -1.733040000 |
| 1  | -2.283801000 | -3.172159000 | -1.675103000 |
| 1  | -5.502702000 | -1.177439000 | 0.328628000  |
| 1  | -4.535736000 | 1.009897000  | -0.300985000 |
| 1  | -1.311594000 | -0.991522000 | -2.290849000 |
| 1  | -2.455886000 | 1.103520000  | -1.633460000 |

E(M06-2X) : -1382.1878021

TS for N-O cleavage of radical 24, complex with benzene, optimized geometry (M06-2X/6-311++G(2df,p), polarizable continuum model, benzene)

|    |              |              |              |
|----|--------------|--------------|--------------|
| 1  | -2.772109000 | 0.683041000  | 3.431918000  |
| 6  | -2.001513000 | 0.440387000  | 2.713958000  |
| 7  | -0.010614000 | -0.177391000 | 0.879138000  |
| 6  | -1.097555000 | 1.406464000  | 2.288793000  |
| 6  | -1.894646000 | -0.848925000 | 2.176257000  |
| 6  | -0.904231000 | -1.137570000 | 1.283189000  |
| 6  | -0.104053000 | 1.103597000  | 1.377019000  |
| 1  | -1.164739000 | 2.428579000  | 2.638735000  |
| 1  | -2.600407000 | -1.626249000 | 2.437447000  |
| 1  | -0.775587000 | -2.104155000 | 0.817432000  |
| 16 | 1.038103000  | 2.315747000  | 0.805255000  |
| 6  | 0.378916000  | 2.762821000  | -0.873391000 |
| 6  | -1.062080000 | 3.241395000  | -0.755966000 |
| 1  | -1.131111000 | 4.113730000  | -0.103760000 |
| 1  | -1.708235000 | 2.458869000  | -0.353938000 |

|   |              |              |              |
|---|--------------|--------------|--------------|
| 1 | -1.436858000 | 3.517773000  | -1.746137000 |
| 6 | 1.287242000  | 3.902147000  | -1.330114000 |
| 1 | 1.220385000  | 4.757905000  | -0.656027000 |
| 1 | 0.981114000  | 4.225228000  | -2.328163000 |
| 1 | 2.328585000  | 3.577863000  | -1.381850000 |
| 6 | 0.494347000  | 1.577547000  | -1.824601000 |
| 1 | -0.078802000 | 0.719168000  | -1.474393000 |
| 1 | 1.534716000  | 1.263956000  | -1.927956000 |
| 1 | 0.121371000  | 1.866925000  | -2.812550000 |
| 8 | 1.456029000  | -0.703459000 | 0.994719000  |
| 6 | 1.848386000  | -1.346593000 | -0.112521000 |
| 8 | 1.108212000  | -1.657351000 | -1.007813000 |
| 6 | 3.353340000  | -1.611770000 | -0.085223000 |
| 6 | 3.751231000  | -2.265887000 | 1.242398000  |
| 1 | 4.822415000  | -2.477363000 | 1.230040000  |
| 1 | 3.220658000  | -3.208895000 | 1.390427000  |
| 1 | 3.536685000  | -1.612030000 | 2.087057000  |
| 6 | 3.713074000  | -2.523135000 | -1.254380000 |
| 1 | 4.790477000  | -2.699770000 | -1.256559000 |
| 1 | 3.430373000  | -2.071038000 | -2.204985000 |
| 1 | 3.203608000  | -3.484455000 | -1.174390000 |
| 6 | 4.057759000  | -0.255219000 | -0.231466000 |
| 1 | 5.139147000  | -0.408279000 | -0.220444000 |
| 1 | 3.787599000  | 0.417995000  | 0.582386000  |
| 1 | 3.791773000  | 0.223070000  | -1.176867000 |
| 1 | -4.154818000 | -3.439093000 | -0.147646000 |
| 6 | -3.775775000 | -2.496708000 | -0.524823000 |
| 6 | -2.811225000 | -0.084019000 | -1.501246000 |
| 6 | -2.654897000 | -2.477479000 | -1.345657000 |
| 6 | -4.409458000 | -1.307828000 | -0.185146000 |
| 6 | -3.926844000 | -0.100458000 | -0.673852000 |
| 6 | -2.168840000 | -1.270373000 | -1.831154000 |
| 1 | -2.152998000 | -3.402692000 | -1.602289000 |
| 1 | -5.280112000 | -1.322373000 | 0.459528000  |
| 1 | -4.420482000 | 0.827556000  | -0.410610000 |
| 1 | -1.281031000 | -1.255325000 | -2.451106000 |
| 1 | -2.439944000 | 0.855960000  | -1.891035000 |

E(M06-2X) : -1382.1856539

Radical 27, optimized geometry (M06-2X/6-311++G(2df,p), polarizable continuum model, benzene)

|    |              |              |              |
|----|--------------|--------------|--------------|
| 1  | -2.763502000 | 2.971894000  | 1.109546000  |
| 6  | -1.886907000 | 2.428999000  | 0.779594000  |
| 7  | 0.281406000  | 1.054265000  | -0.047670000 |
| 6  | -1.476698000 | 1.321682000  | 1.467253000  |
| 6  | -1.185339000 | 2.857679000  | -0.362364000 |
| 6  | -0.098067000 | 2.141040000  | -0.753248000 |
| 6  | -0.343001000 | 0.570751000  | 1.071949000  |
| 1  | -2.010613000 | 0.965459000  | 2.336512000  |
| 1  | -1.487070000 | 3.724177000  | -0.931078000 |
| 1  | 0.511641000  | 2.358669000  | -1.617756000 |
| 16 | 0.171799000  | -0.837290000 | 1.837899000  |
| 8  | 1.345658000  | 0.365138000  | -0.552200000 |
| 6  | 2.545657000  | 0.639780000  | 0.108522000  |
| 8  | 2.622271000  | 1.505579000  | 0.917118000  |
| 16 | -0.714039000 | -2.379342000 | -0.244806000 |
| 6  | -2.128822000 | -1.372045000 | -0.462061000 |
| 6  | -4.314721000 | 0.244470000  | -0.798884000 |
| 7  | -2.109047000 | -0.449373000 | -1.435462000 |
| 6  | -3.231781000 | -1.515989000 | 0.392708000  |
| 6  | -4.331107000 | -0.695543000 | 0.222486000  |
| 6  | -3.181464000 | 0.319543000  | -1.596842000 |
| 1  | -3.200532000 | -2.266157000 | 1.171052000  |
| 1  | -5.191797000 | -0.791631000 | 0.873446000  |
| 1  | -3.129192000 | 1.043657000  | -2.404652000 |
| 1  | -5.155040000 | 0.902101000  | -0.978132000 |

|   |             |              |              |
|---|-------------|--------------|--------------|
| 6 | 3.628019000 | -0.286397000 | -0.399510000 |
| 6 | 3.252357000 | -1.728874000 | -0.029648000 |
| 1 | 4.029462000 | -2.395954000 | -0.407812000 |
| 1 | 2.295270000 | -2.013033000 | -0.468294000 |
| 1 | 3.184301000 | -1.850156000 | 1.052087000  |
| 6 | 3.729350000 | -0.147332000 | -1.925654000 |
| 1 | 3.941283000 | 0.883894000  | -2.216436000 |
| 1 | 2.812064000 | -0.471990000 | -2.416071000 |
| 1 | 4.549620000 | -0.774222000 | -2.278892000 |
| 6 | 4.942389000 | 0.114472000  | 0.263999000  |
| 1 | 5.733071000 | -0.554507000 | -0.078823000 |
| 1 | 4.869787000 | 0.041765000  | 1.349255000  |
| 1 | 5.217945000 | 1.138767000  | 0.009342000  |

E(M06-2X) = -1638.0144734

Transition state for 27 → 28, optimized geometry (M06-2X/6-311++G(2df,p), polarizable continuum model, benzene)

|    |              |              |              |
|----|--------------|--------------|--------------|
| 1  | 3.443838000  | -4.297069000 | -0.421368000 |
| 6  | 3.069981000  | -3.303664000 | -0.208661000 |
| 7  | 2.121902000  | -0.838056000 | 0.328189000  |
| 6  | 1.864035000  | -2.913089000 | -0.713031000 |
| 6  | 3.829530000  | -2.426916000 | 0.591861000  |
| 6  | 3.324629000  | -1.191877000 | 0.839984000  |
| 6  | 1.328126000  | -1.621158000 | -0.467887000 |
| 1  | 1.265865000  | -3.573535000 | -1.323862000 |
| 1  | 4.785325000  | -2.708908000 | 1.006172000  |
| 1  | 3.804978000  | -0.432475000 | 1.439209000  |
| 16 | -0.139841000 | -1.072730000 | -1.073585000 |
| 8  | 1.691435000  | 0.421685000  | 0.640298000  |
| 6  | 1.997614000  | 1.361129000  | -0.352798000 |
| 8  | 2.694045000  | 1.070985000  | -1.269807000 |
| 16 | -1.299771000 | -0.401261000 | 1.393027000  |
| 6  | -2.867490000 | -0.332454000 | 0.613853000  |
| 6  | -5.310265000 | -0.190784000 | -0.605167000 |
| 6  | -3.550844000 | -1.516272000 | 0.306701000  |
| 7  | -3.371579000 | 0.873200000  | 0.320326000  |
| 6  | -4.563206000 | 0.929311000  | -0.264765000 |
| 6  | -4.784348000 | -1.440699000 | -0.312954000 |
| 1  | -3.101152000 | -2.466808000 | 0.558772000  |
| 1  | -4.941320000 | 1.923949000  | -0.479262000 |
| 1  | -5.329056000 | -2.343339000 | -0.561680000 |
| 1  | -6.272553000 | -0.079619000 | -1.086763000 |
| 6  | 1.328161000  | 2.686294000  | -0.066334000 |
| 6  | -0.050134000 | 2.635359000  | -0.750352000 |
| 1  | -0.528124000 | 3.609131000  | -0.625903000 |
| 1  | -0.687891000 | 1.875284000  | -0.298061000 |
| 1  | 0.051352000  | 2.428844000  | -1.817057000 |
| 6  | 1.149370000  | 2.921332000  | 1.435727000  |
| 1  | 2.105048000  | 2.891400000  | 1.963405000  |
| 1  | 0.476914000  | 2.183432000  | 1.872639000  |
| 1  | 0.712832000  | 3.910840000  | 1.580426000  |
| 6  | 2.188404000  | 3.784139000  | -0.693399000 |
| 1  | 1.697704000  | 4.746850000  | -0.543967000 |
| 1  | 2.315861000  | 3.618736000  | -1.762769000 |
| 1  | 3.176696000  | 3.825855000  | -0.231227000 |

E(M06-2X) = -1638.0071047

Radical 28, optimized geometry (M06-2X/6-311++G(2df,p), polarizable continuum model, benzene)

|   |              |             |              |
|---|--------------|-------------|--------------|
| 1 | 2.797781000  | 2.950628000 | -1.145941000 |
| 6 | 1.914694000  | 2.420950000 | -0.812257000 |
| 7 | -0.262210000 | 1.070074000 | 0.037894000  |
| 6 | 1.500377000  | 1.305087000 | -1.481370000 |

|    |              |              |              |
|----|--------------|--------------|--------------|
| 6  | 1.205141000  | 2.880228000  | 0.315976000  |
| 6  | 0.113759000  | 2.177838000  | 0.716989000  |
| 6  | 0.356068000  | 0.569808000  | -1.082600000 |
| 1  | 2.037724000  | 0.925403000  | -2.338764000 |
| 1  | 1.504883000  | 3.760784000  | 0.863819000  |
| 1  | -0.503179000 | 2.421700000  | 1.569606000  |
| 16 | -0.172518000 | -0.833779000 | -1.838579000 |
| 8  | -1.322655000 | 0.385721000  | 0.560146000  |
| 6  | -2.530690000 | 0.656076000  | -0.092863000 |
| 8  | -2.611741000 | 1.519866000  | -0.902237000 |
| 16 | 0.747528000  | -2.450817000 | 0.087814000  |
| 6  | 2.129208000  | -1.420481000 | 0.398489000  |
| 6  | 4.267380000  | 0.228644000  | 0.855871000  |
| 6  | 2.129818000  | -0.587283000 | 1.526321000  |
| 7  | 3.148596000  | -1.427931000 | -0.471345000 |
| 6  | 4.179286000  | -0.622848000 | -0.238653000 |
| 6  | 3.214499000  | 0.238761000  | 1.758929000  |
| 1  | 1.280173000  | -0.606561000 | 2.196763000  |
| 1  | 4.983571000  | -0.659175000 | -0.967249000 |
| 1  | 3.235144000  | 0.884799000  | 2.628689000  |
| 1  | 5.138160000  | 0.856308000  | 0.991749000  |
| 6  | -3.608513000 | -0.270696000 | 0.422908000  |
| 6  | -3.250972000 | -1.708077000 | 0.015875000  |
| 1  | -4.022109000 | -2.377803000 | 0.401472000  |
| 1  | -2.284167000 | -2.007080000 | 0.422341000  |
| 1  | -3.212186000 | -1.808660000 | -1.069339000 |
| 6  | -3.678737000 | -0.161862000 | 1.953001000  |
| 1  | -3.869557000 | 0.865811000  | 2.269793000  |
| 1  | -2.758067000 | -0.510970000 | 2.419744000  |
| 1  | -4.501343000 | -0.784018000 | 2.308919000  |
| 6  | -4.933664000 | 0.151893000  | -0.205219000 |
| 1  | -5.721511000 | -0.519182000 | 0.139871000  |
| 1  | -4.883568000 | 0.101236000  | -1.292862000 |
| 1  | -5.197371000 | 1.172392000  | 0.076120000  |

E(M06-2X): -1638.0119376

Transition state for 28 → 6 + 9, optimized geometry (M06-2X/6-311++G(2df,p), polarizable continuum model, benzene)

|    |              |              |              |
|----|--------------|--------------|--------------|
| 1  | -0.330382000 | 4.564171000  | -0.642448000 |
| 6  | -0.399270000 | 3.564770000  | -0.237416000 |
| 7  | -0.585939000 | 0.990343000  | 0.792786000  |
| 6  | 0.024789000  | 2.468790000  | -0.980232000 |
| 6  | -0.892356000 | 3.342450000  | 1.053096000  |
| 6  | -0.975768000 | 2.070346000  | 1.543755000  |
| 6  | -0.096170000 | 1.195960000  | -0.467604000 |
| 1  | 0.463219000  | 2.592604000  | -1.962809000 |
| 1  | -1.192101000 | 4.166589000  | 1.686589000  |
| 1  | -1.334830000 | 1.830963000  | 2.535009000  |
| 16 | 0.327528000  | -0.202766000 | -1.458270000 |
| 8  | -1.645427000 | -0.172520000 | 0.882903000  |
| 6  | -2.712672000 | -0.004170000 | 0.083019000  |
| 8  | -2.925375000 | 0.992395000  | -0.552691000 |
| 16 | 1.239177000  | -1.483775000 | -0.148693000 |
| 6  | 2.919739000  | -0.896427000 | -0.011419000 |
| 6  | 5.520519000  | -0.261005000 | 0.411681000  |
| 6  | 3.406807000  | 0.275548000  | -0.579193000 |
| 7  | 3.651483000  | -1.715748000 | 0.730831000  |
| 6  | 4.928138000  | -1.399203000 | 0.935334000  |
| 6  | 4.737641000  | 0.587169000  | -0.357984000 |
| 1  | 2.770957000  | 0.916673000  | -1.172341000 |
| 1  | 5.498134000  | -2.091416000 | 1.545445000  |
| 1  | 5.158250000  | 1.490002000  | -0.783493000 |
| 1  | 6.562768000  | -0.047845000 | 0.605231000  |
| 6  | -3.584922000 | -1.260586000 | 0.076032000  |
| 6  | -2.774876000 | -2.389074000 | -0.576985000 |
| 1  | -3.384499000 | -3.294567000 | -0.611113000 |



|   |              |              |              |
|---|--------------|--------------|--------------|
| 1 | -1.868238000 | -2.601242000 | -0.008798000 |
| 1 | -2.491313000 | -2.127319000 | -1.598281000 |
| 6 | -3.952526000 | -1.643506000 | 1.513944000  |
| 1 | -4.491581000 | -0.833720000 | 2.010451000  |
| 1 | -3.065005000 | -1.880501000 | 2.099957000  |
| 1 | -4.601361000 | -2.521457000 | 1.495697000  |
| 6 | -4.844126000 | -0.974010000 | -0.736141000 |
| 1 | -5.469711000 | -1.868509000 | -0.758690000 |
| 1 | -4.594853000 | -0.694962000 | -1.759910000 |
| 1 | -5.418795000 | -0.158286000 | -0.295441000 |

E(M06-2X) : -1638.0032196

Di-2-pyridylldisulfide 9, optimized geometry (M06-2X/6-311++G(2df,p), polarizable continuum model, benzene)

|    |              |              |              |
|----|--------------|--------------|--------------|
| 1  | 2.408658000  | 2.201034000  | 1.967447000  |
| 6  | 2.571417000  | 1.476309000  | 1.179114000  |
| 7  | 2.976072000  | -0.374407000 | -0.841303000 |
| 6  | 1.584864000  | 0.555329000  | 0.874082000  |
| 6  | 3.760903000  | 1.467292000  | 0.463535000  |
| 6  | 3.911033000  | 0.524949000  | -0.540693000 |
| 6  | 1.849015000  | -0.352789000 | -0.144466000 |
| 1  | 0.642187000  | 0.542985000  | 1.401541000  |
| 1  | 4.552212000  | 2.173540000  | 0.674170000  |
| 1  | 4.819856000  | 0.482010000  | -1.131059000 |
| 16 | 0.720126000  | -1.613515000 | -0.708209000 |
| 16 | -0.775854000 | -1.653185000 | 0.665087000  |
| 6  | -1.880842000 | -0.343012000 | 0.149413000  |
| 6  | -3.583903000 | 1.650354000  | -0.529000000 |
| 7  | -1.430817000 | 0.611573000  | -0.642022000 |
| 6  | -3.178743000 | -0.382848000 | 0.658679000  |
| 6  | -4.038896000 | 0.641076000  | 0.310754000  |
| 6  | -2.276392000 | 1.586921000  | -0.979458000 |
| 1  | -3.496761000 | -1.198431000 | 1.295534000  |
| 1  | -5.056341000 | 0.646676000  | 0.681563000  |
| 1  | -1.878808000 | 2.351820000  | -1.637528000 |
| 1  | -4.226877000 | 2.465909000  | -0.830194000 |

E(M06-2X) : -1291.7153796

Calculated UV/Vis spectrum of 5 × benzene (TD-B3LYP/6-311++G(2df,p)//M06-2X/cc-pVTZ, polarizable continuum model, benzene):

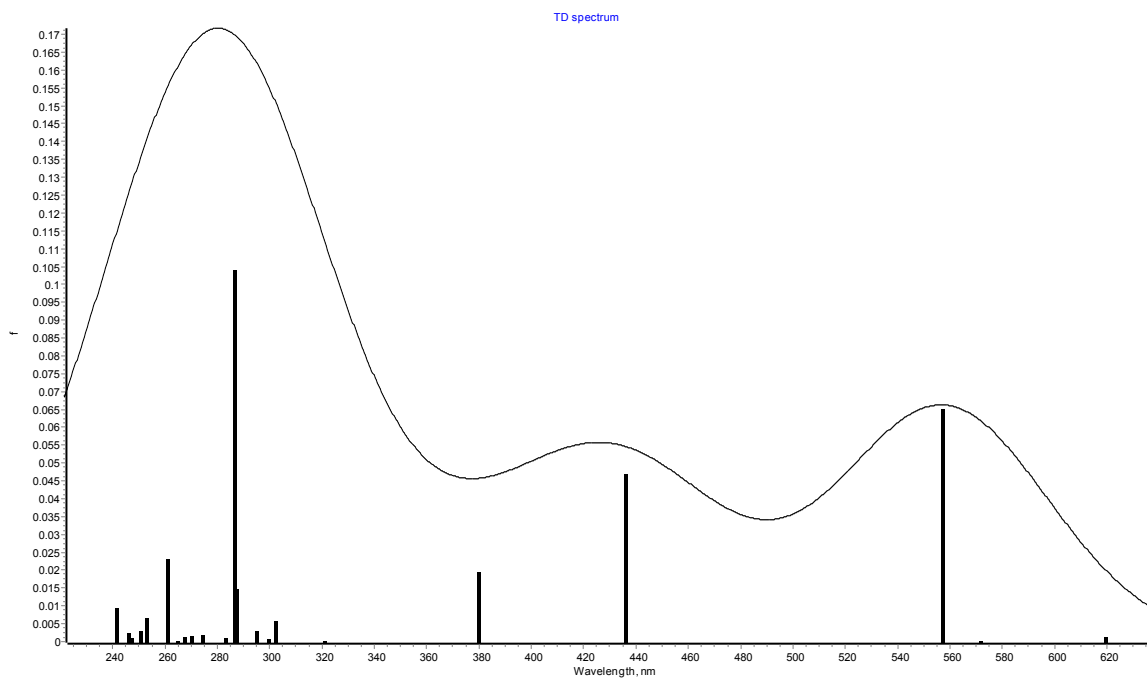

## Trajectory computations

Before performing Born-Oppenheimer molecular dynamics (BOMD) simulations, the conformational space of **4** was investigated. Four conformers were identified, namely **a**, **b**, **c** and **d**. All conformers were optimized at B3LYP-D3(BJ)/6-31G\* level of theory.

**Chart S1.** Four possible ground state conformers of the Barton ester **4**. Numerical values are for relative free energies at 25 °C.

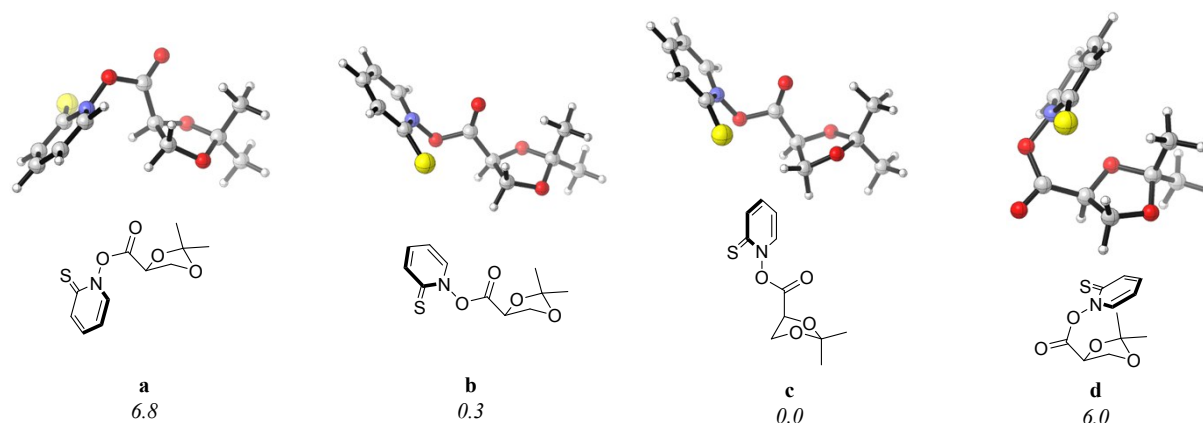

Quasiclassical trajectories (QCTs) were initialized from normal mode sampling of **c** in T1 state, taking the ground state geometry, to approximate a quantum mechanical Boltzmann distribution of the vibrational levels at 298 K. Total 100 trajectories, at UB3LYP-D3(BJ)/6-31G(d) level, were initiated from the sampled structures. Because there are several possibilities of fragmentation, no stopping criteria was used. Trajectories were ran for maximum of 3000 steps (MaxPoints=3000, iop(1/8=2500)). All the computations were done utilizing the Gaussian 09 program package.

**Table S1.** Time of the breaking of N-O and C-CO<sub>2</sub> bonds.

| Trajectory Number | time (fs) of N-O bond breaking as defined by the bond distance of 1.60 Å | C-CO <sub>2</sub> bond breaking time (fs) as defined by the bond distance of 1.90 Å |
|-------------------|--------------------------------------------------------------------------|-------------------------------------------------------------------------------------|
| 1                 | 137                                                                      | 180                                                                                 |
| 2                 | 168                                                                      | 227                                                                                 |
| 3                 | 33                                                                       | 118                                                                                 |
| 4                 | 154                                                                      | 225                                                                                 |
| 5                 | 55                                                                       | 126                                                                                 |
| 6                 | 78                                                                       | 157                                                                                 |
| 7                 | 164                                                                      | 219                                                                                 |
| 8                 | 417                                                                      | 1121                                                                                |
| 9                 | 23                                                                       | 104                                                                                 |
| 10                | 249                                                                      | 298                                                                                 |
| 11                | 336                                                                      | 594                                                                                 |
| 12                | 141                                                                      | 190                                                                                 |
| 13                | 92                                                                       | 175                                                                                 |
| 14                | 227                                                                      | 281                                                                                 |
| 15                | 225                                                                      | 276                                                                                 |
| 16                | 110                                                                      | 182                                                                                 |
| 17                | 226                                                                      | 271                                                                                 |
| 18                | 286                                                                      | 358                                                                                 |
| 19                | 143                                                                      | 187                                                                                 |

---

|    |     |     |
|----|-----|-----|
| 20 | 217 | 273 |
| 21 | 275 | 312 |
| 22 | 370 | 422 |
| 23 | 217 | 274 |
| 24 | 172 | 233 |
| 25 | 164 | 222 |
| 26 | 175 | 231 |
| 27 | 787 | 832 |
| 28 | 236 | 291 |
| 29 | 139 | 193 |
| 30 | 50  | 102 |
| 31 | 281 | 338 |
| 32 | 228 | 279 |
| 33 | 214 | 266 |
| 34 | 64  | 140 |
| 35 | 263 | 324 |
| 36 | 233 | 287 |
| 37 | 168 | 221 |
| 38 | 142 | 183 |
| 39 | 140 | 210 |
| 40 | 25  | 78  |
| 41 | 150 | 200 |
| 42 | 459 | 500 |
| 43 | 91  | 157 |
| 44 | 42  | 116 |
| 46 | 151 | 234 |
| 47 | 221 | 274 |
| 48 | 159 | 214 |
| 49 | 93  | 164 |
| 50 | 205 | 258 |
| 51 | 41  | 116 |
| 52 | 218 | 251 |
| 53 | 212 | 259 |
| 54 | 132 | 200 |
| 55 | 284 | 628 |
| 56 | 281 | 415 |
| 57 | 162 | 200 |
| 58 | 145 | 735 |
| 59 | 230 | 274 |
| 60 | 175 | 698 |
| 61 | 129 | 187 |
| 62 | 171 | 229 |
| 63 | 182 | 245 |
| 64 | 201 | 258 |
| 65 | 565 | 621 |
| 66 | 171 | 227 |
| 67 | 213 | 275 |
| 68 | 175 | 229 |
| 69 | 102 | 149 |
| 70 | 335 | 385 |
| 71 | 217 | 254 |
| 72 | 150 | 192 |
| 73 | 227 | 274 |
| 74 | 185 | 232 |
| 75 | 197 | 265 |
| 76 | 258 | 322 |
| 78 | 141 | 188 |
| 79 | 118 | 180 |
| 80 | 351 | 419 |
| 81 | 72  | 134 |
| 82 | 147 | 195 |
| 83 | 143 | 204 |
| 84 | 333 | 379 |
| 85 | 184 | 233 |
| 86 | 266 | 328 |
| 87 | 119 | 171 |
| 88 | 223 | 282 |
| 89 | 390 | 443 |
| 90 | 148 | 202 |

---

|     |     |     |
|-----|-----|-----|
| 91  | 406 | 459 |
| 92  | 218 | 280 |
| 93  | 190 | 237 |
| 94  | 119 | 163 |
| 95  | 89  | 245 |
| 96  | 111 | 172 |
| 97  | 224 | 272 |
| 98  | 217 | 264 |
| 99  | 181 | 222 |
| 100 | 90  | 162 |

Data for the productive trajectory:

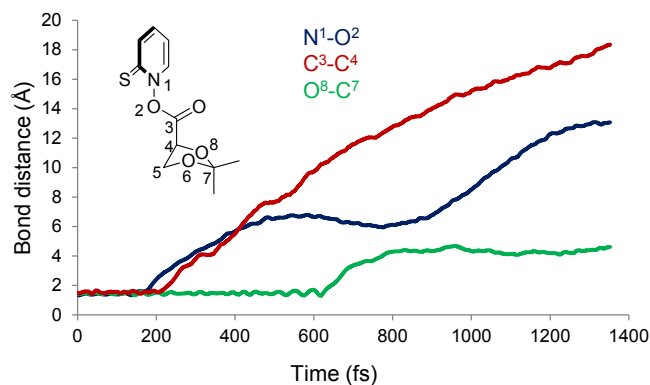

| Time (fs) | N <sup>1</sup> -O <sup>2</sup> (Å) | C <sup>3</sup> -C <sup>4</sup> (Å) | O <sup>6</sup> -C <sup>7</sup> (Å) |
|-----------|------------------------------------|------------------------------------|------------------------------------|
| 0.00000   | 1.354413915                        | 1.495538943                        | 1.431063559                        |
| 0.501956  | 1.349482037                        | 1.484812104                        | 1.427115299                        |
| 1.00485   | 1.344933864                        | 1.47509568                         | 1.423714673                        |
| 1.513749  | 1.340834313                        | 1.466497972                        | 1.420881372                        |
| 2.031863  | 1.337273424                        | 1.459175546                        | 1.418652007                        |
| 2.556776  | 1.334382716                        | 1.453365107                        | 1.417082543                        |
| 3.078108  | 1.332293326                        | 1.4492965                          | 1.416205272                        |
| 3.583326  | 1.331060793                        | 1.447027646                        | 1.415986733                        |
| 4.067642  | 1.330635306                        | 1.446409194                        | 1.416333971                        |
| 4.535826  | 1.330936452                        | 1.447235402                        | 1.417154114                        |
| 4.997733  | 1.331916627                        | 1.449363318                        | 1.418393987                        |
| 5.464399  | 1.333575192                        | 1.452740944                        | 1.420037673                        |
| 5.945468  | 1.33596074                         | 1.457370612                        | 1.422095824                        |
| 5.945468  | 1.339132842                        | 1.463233452                        | 1.424574367                        |
| 6.96885   | 1.343118687                        | 1.470191617                        | 1.427447192                        |
| 7.508303  | 1.347890382                        | 1.477955433                        | 1.430652504                        |
| 8.059312  | 1.353356789                        | 1.486129461                        | 1.434089408                        |
| 8.614641  | 1.359371458                        | 1.49430062                         | 1.437641572                        |
| 9.16695   | 1.365752253                        | 1.502128837                        | 1.441185023                        |
| 9.711456  | 1.372331996                        | 1.509419107                        | 1.444619726                        |
| 10.247224 | 1.378989392                        | 1.516105045                        | 1.44788696                         |
| 10.776434 | 1.385661747                        | 1.522213978                        | 1.45095279                         |
| 11.302843 | 1.39231279                         | 1.527806361                        | 1.453803858                        |
| 11.83023  | 1.398922143                        | 1.532953159                        | 1.456425637                        |
| 12.361024 | 1.405453873                        | 1.537722621                        | 1.458795101                        |
| 12.89519  | 1.411847238                        | 1.542170623                        | 1.460881315                        |
| 12.89519  | 1.418003977                        | 1.546343297                        | 1.462644558                        |
| 13.95411  | 1.423785981                        | 1.550260302                        | 1.464047155                        |
| 14.460002 | 1.429066642                        | 1.553926899                        | 1.46507464                         |
| 14.94179  | 1.433800239                        | 1.557369481                        | 1.465747557                        |
| 15.402997 | 1.438035565                        | 1.560651565                        | 1.46610676                         |
| 15.852566 | 1.441862802                        | 1.563850975                        | 1.466184387                        |
| 16.301656 | 1.445370332                        | 1.567048193                        | 1.465992331                        |
| 16.762092 | 1.448617802                        | 1.570310481                        | 1.465515568                        |
| 17.244908 | 1.45162537                         | 1.573688241                        | 1.464713375                        |
| 17.756695 | 1.454347261                        | 1.57717266                         | 1.463535232                        |
| 18.294535 | 1.456670011                        | 1.580676434                        | 1.461947165                        |
| 18.846806 | 1.458462227                        | 1.584052792                        | 1.459969824                        |
| 19.401114 | 1.459641339                        | 1.587183557                        | 1.457672659                        |
| 19.401114 | 1.460185248                        | 1.590013489                        | 1.455143923                        |

|           |             |             |             |
|-----------|-------------|-------------|-------------|
| 20.487366 | 1.460111501 | 1.592531106 | 1.452472423 |
| 21.015759 | 1.459448239 | 1.594740185 | 1.449737    |
| 21.537178 | 1.458226904 | 1.596653639 | 1.446995448 |
| 22.055853 | 1.456460029 | 1.598265814 | 1.444295415 |
| 22.575838 | 1.454156385 | 1.599555119 | 1.441685663 |
| 23.099725 | 1.451323898 | 1.600479561 | 1.439216838 |
| 23.627877 | 1.447986642 | 1.600976775 | 1.436950562 |
| 24.157643 | 1.444202828 | 1.60097673  | 1.434949315 |
| 24.682086 | 1.440079559 | 1.600415109 | 1.433273895 |
| 25.191563 | 1.435770214 | 1.599261447 | 1.431961273 |
| 25.679921 | 1.43141315  | 1.597516064 | 1.431005823 |
| 26.148421 | 1.427075794 | 1.59518188  | 1.430370217 |
| 26.148421 | 1.422749927 | 1.592214383 | 1.430015867 |
| 27.056975 | 1.418394044 | 1.588516133 | 1.429913476 |
| 27.518143 | 1.413942881 | 1.583904762 | 1.430060569 |
| 27.998491 | 1.409335042 | 1.578117299 | 1.430474548 |
| 28.505154 | 1.404561148 | 1.570850227 | 1.431187259 |
| 29.035615 | 1.399717109 | 1.561906923 | 1.432224243 |
| 29.576613 | 1.395003112 | 1.551377479 | 1.433572381 |
| 30.113476 | 1.390607379 | 1.539616001 | 1.435181091 |
| 30.638318 | 1.386638537 | 1.527047375 | 1.436997679 |
| 31.150122 | 1.383125221 | 1.514056622 | 1.438980965 |
| 31.652079 | 1.380061188 | 1.500964519 | 1.441114938 |
| 32.149548 | 1.377430518 | 1.48802661  | 1.443397193 |
| 32.648729 | 1.375224073 | 1.475484219 | 1.445842229 |
| 32.648729 | 1.373446033 | 1.463599101 | 1.448471751 |
| 33.675632 | 1.372120423 | 1.452704083 | 1.451307289 |
| 34.21204  | 1.371281866 | 1.443213536 | 1.454364122 |
| 34.766039 | 1.370972379 | 1.435629975 | 1.457636236 |
| 35.33148  | 1.371212575 | 1.430506739 | 1.461071303 |
| 35.891613 | 1.37196711  | 1.428234087 | 1.464535965 |
| 36.429459 | 1.373127354 | 1.428766135 | 1.467882385 |
| 36.940947 | 1.37457931  | 1.431737782 | 1.471047416 |
| 37.433059 | 1.376248263 | 1.436793415 | 1.474040081 |
| 37.916918 | 1.378103193 | 1.443745071 | 1.476900258 |
| 38.404248 | 1.38014095  | 1.452560291 | 1.479661278 |
| 38.905765 | 1.382369143 | 1.463309655 | 1.482340833 |
| 39.428284 | 1.38478808  | 1.476041845 | 1.484919625 |
| 39.428284 | 1.387348701 | 1.490523787 | 1.487313361 |
| 40.512587 | 1.389947984 | 1.506081452 | 1.489401697 |
| 41.042935 | 1.392477582 | 1.521877652 | 1.491093085 |
| 41.553634 | 1.394890071 | 1.537378347 | 1.492372831 |
| 42.04716  | 1.397186694 | 1.552375985 | 1.493266705 |
| 42.529058 | 1.399390207 | 1.566811535 | 1.493804042 |
| 43.004926 | 1.401521917 | 1.580653088 | 1.494002265 |
| 43.479476 | 1.403600867 | 1.593847141 | 1.493870894 |
| 43.956535 | 1.40563688  | 1.606305931 | 1.493412171 |
| 44.439585 | 1.407641664 | 1.617913581 | 1.492619794 |
| 44.932332 | 1.409618403 | 1.628538894 | 1.491481113 |
| 45.438033 | 1.411567246 | 1.638014213 | 1.489978787 |
| 45.956302 | 1.413472951 | 1.646093893 | 1.488104243 |
| 45.956302 | 1.415287854 | 1.652488391 | 1.485886183 |
| 46.995773 | 1.416955327 | 1.657018314 | 1.483390711 |
| 47.498119 | 1.418444028 | 1.659724333 | 1.480688733 |
| 47.988151 | 1.419751263 | 1.660776039 | 1.477808695 |
| 48.472909 | 1.420884365 | 1.660323171 | 1.474737909 |
| 48.961577 | 1.421851292 | 1.658427746 | 1.471433588 |
| 49.46405  | 1.422642728 | 1.655050887 | 1.467839008 |
| 49.989576 | 1.423238121 | 1.650067622 | 1.463886985 |
| 50.542023 | 1.423600012 | 1.64334733  | 1.459554663 |
| 51.111075 | 1.423687378 | 1.634981747 | 1.454940584 |
| 51.674224 | 1.423501021 | 1.625432952 | 1.450266043 |
| 52.216423 | 1.42308604  | 1.615245203 | 1.445711627 |
| 52.737523 | 1.422495    | 1.604738864 | 1.441331604 |
| 52.737523 | 1.421769444 | 1.594058545 | 1.437112597 |
| 53.743235 | 1.420943362 | 1.583294346 | 1.433039704 |
| 54.239828 | 1.420044678 | 1.572544872 | 1.429116903 |
| 54.737456 | 1.419100875 | 1.561924899 | 1.425363542 |
| 55.239686 | 1.418133698 | 1.551539939 | 1.421808561 |

|           |             |             |             |
|-----------|-------------|-------------|-------------|
| 55.750666 | 1.417164442 | 1.541492712 | 1.418486941 |
| 56.272635 | 1.416211122 | 1.531931627 | 1.415458838 |
| 56.800924 | 1.415296698 | 1.523124453 | 1.412824622 |
| 57.323636 | 1.414447514 | 1.51539117  | 1.410696211 |
| 57.830702 | 1.41366763  | 1.508901501 | 1.409131755 |
| 58.320707 | 1.412943176 | 1.503622575 | 1.408115422 |
| 58.798781 | 1.412245267 | 1.499416558 | 1.407617875 |
| 59.272366 | 1.411540039 | 1.496142694 | 1.407620081 |
| 59.272366 | 1.410793416 | 1.493681965 | 1.408124434 |
| 60.234796 | 1.409966005 | 1.491935219 | 1.409162842 |
| 60.735282 | 1.40901479  | 1.490801055 | 1.410776748 |
| 61.253786 | 1.407894941 | 1.490164468 | 1.413019189 |
| 61.790581 | 1.406562619 | 1.489893954 | 1.41592823  |
| 62.339114 | 1.404991486 | 1.489841535 | 1.419485722 |
| 62.885229 | 1.403200547 | 1.489867967 | 1.423576472 |
| 63.416895 | 1.40123067  | 1.489863996 | 1.428038155 |
| 63.932417 | 1.399111301 | 1.489764403 | 1.432769297 |
| 64.43669  | 1.396851175 | 1.489535057 | 1.437737327 |
| 64.934973 | 1.394456766 | 1.489156035 | 1.442932872 |
| 65.430829 | 1.391946307 | 1.488625892 | 1.448336022 |
| 65.927437 | 1.389342981 | 1.487960168 | 1.453935406 |
| 65.927437 | 1.386667299 | 1.487190662 | 1.459726502 |
| 66.938463 | 1.383955059 | 1.486368081 | 1.465698427 |
| 67.454754 | 1.381273306 | 1.485568968 | 1.471778019 |
| 67.969859 | 1.378726741 | 1.484889745 | 1.477809978 |
| 68.47476  | 1.376416426 | 1.484419142 | 1.483625565 |
| 68.965639 | 1.374405825 | 1.484216388 | 1.489126796 |
| 69.444519 | 1.37271923  | 1.484308973 | 1.494285174 |
| 69.916678 | 1.371366373 | 1.484720526 | 1.499114772 |
| 70.388451 | 1.370364646 | 1.485472849 | 1.503631073 |
| 70.865946 | 1.369742044 | 1.486588619 | 1.50783152  |
| 71.35422  | 1.369544879 | 1.488095407 | 1.511689823 |
| 71.85675  | 1.369833741 | 1.490011107 | 1.515148491 |
| 72.375047 | 1.370673412 | 1.492337508 | 1.518125921 |
| 72.375047 | 1.372116413 | 1.495044122 | 1.520522135 |
| 73.444305 | 1.374170284 | 1.498050687 | 1.522238922 |
| 73.971656 | 1.376753654 | 1.501233015 | 1.523230262 |
| 74.479294 | 1.379744948 | 1.504499055 | 1.523534504 |
| 74.967936 | 1.383061364 | 1.507837312 | 1.523240857 |
| 75.443885 | 1.386666044 | 1.511291704 | 1.522419505 |
| 75.913501 | 1.390543367 | 1.514916544 | 1.521114169 |
| 76.381627 | 1.394680307 | 1.518763183 | 1.519350562 |
| 76.852494 | 1.399065123 | 1.522875944 | 1.517142527 |
| 77.330392 | 1.403685963 | 1.527295065 | 1.514486811 |
| 77.818416 | 1.408521921 | 1.532046205 | 1.511379898 |
| 78.316112 | 1.413505037 | 1.537100446 | 1.507835244 |
| 78.819173 | 1.418520387 | 1.542364738 | 1.503903358 |
| 78.819173 | 1.423441987 | 1.547713124 | 1.49964833  |
| 79.823369 | 1.428165157 | 1.55301752  | 1.495124813 |
| 80.321465 | 1.432621955 | 1.558164708 | 1.490367421 |
| 80.818475 | 1.436764206 | 1.563050699 | 1.485382427 |
| 81.317581 | 1.440555794 | 1.567563601 | 1.480158023 |
| 81.82268  | 1.443966606 | 1.571574312 | 1.474669089 |
| 82.33733  | 1.446954624 | 1.574905259 | 1.468888662 |
| 82.86399  | 1.44946781  | 1.577335168 | 1.462810586 |
| 83.403793 | 1.451446601 | 1.578607457 | 1.456445829 |
| 83.955882 | 1.452834525 | 1.578489754 | 1.449844695 |
| 84.515457 | 1.453589473 | 1.576876741 | 1.443128104 |
| 85.073048 | 1.453706078 | 1.573901964 | 1.436484367 |
| 85.619219 | 1.453236142 | 1.56992788  | 1.430111973 |
| 85.619219 | 1.452260109 | 1.565368043 | 1.424131855 |
| 86.669258 | 1.450852988 | 1.56056886  | 1.418595963 |
| 87.179038 | 1.449071689 | 1.555774811 | 1.413531341 |
| 87.683886 | 1.446959373 | 1.551162088 | 1.408970299 |
| 88.187373 | 1.444546058 | 1.546865226 | 1.404957652 |
| 88.691149 | 1.441864064 | 1.542998434 | 1.401555075 |
| 89.194054 | 1.43895388  | 1.539672546 | 1.398842058 |
| 89.693947 | 1.43586705  | 1.536973412 | 1.39688432  |
| 90.190054 | 1.432641266 | 1.534951694 | 1.395720138 |

|            |             |             |             |
|------------|-------------|-------------|-------------|
| 90.682893  | 1.429311956 | 1.533630487 | 1.395368438 |
| 91.172716  | 1.425906473 | 1.533018946 | 1.395833376 |
| 91.658863  | 1.422459719 | 1.533111726 | 1.397104065 |
| 92.140553  | 1.419010675 | 1.53387979  | 1.39914252  |
| 92.140553  | 1.415586765 | 1.535275218 | 1.401902411 |
| 93.09144   | 1.412211445 | 1.537241278 | 1.405327057 |
| 93.563408  | 1.408900321 | 1.53970948  | 1.409357902 |
| 94.036287  | 1.405661033 | 1.542611503 | 1.413945888 |
| 94.51348   | 1.40249791  | 1.545876246 | 1.419048867 |
| 94.998655  | 1.399420969 | 1.549423259 | 1.424623011 |
| 95.49445   | 1.396445949 | 1.55315127  | 1.430609065 |
| 96.000832  | 1.393611418 | 1.556915734 | 1.436896825 |
| 96.514779  | 1.390966761 | 1.560527298 | 1.443316466 |
| 97.032433  | 1.388562207 | 1.56378896  | 1.449677301 |
| 97.551263  | 1.38642871  | 1.566516294 | 1.455805613 |
| 98.07022   | 1.384583338 | 1.568546875 | 1.46155388  |
| 98.589519  | 1.383029788 | 1.569744568 | 1.46680243  |
| 98.589519  | 1.381770829 | 1.569989846 | 1.471453692 |
| 99.632678  | 1.380807087 | 1.569190053 | 1.475417908 |
| 100.15667  | 1.380138774 | 1.567287619 | 1.478612284 |
| 100.682165 | 1.37975745  | 1.56427215  | 1.480981733 |
| 101.210627 | 1.379658826 | 1.560172402 | 1.482492584 |
| 101.742614 | 1.379836613 | 1.55506783  | 1.483122371 |
| 102.274899 | 1.380282497 | 1.549130118 | 1.48286807  |
| 102.801206 | 1.38097568  | 1.542623423 | 1.481778042 |
| 103.316597 | 1.381892823 | 1.535838247 | 1.479951762 |
| 103.820213 | 1.383012501 | 1.529001079 | 1.47749584  |
| 104.314597 | 1.384324822 | 1.522263077 | 1.474503653 |
| 104.804134 | 1.385832509 | 1.515712663 | 1.47104491  |
| 105.294074 | 1.387553638 | 1.509396915 | 1.46716034  |
| 105.294074 | 1.389510639 | 1.503340028 | 1.462883631 |
| 106.295773 | 1.39174013  | 1.497581797 | 1.45824829  |
| 106.813571 | 1.394268847 | 1.492195539 | 1.453321625 |
| 107.341377 | 1.397106257 | 1.487315449 | 1.448219529 |
| 107.875181 | 1.400246797 | 1.483141349 | 1.443092052 |
| 108.41083  | 1.403669014 | 1.479887222 | 1.438096562 |
| 108.944418 | 1.407344387 | 1.477763072 | 1.433382517 |
| 109.473119 | 1.411237211 | 1.476920024 | 1.42907327  |
| 109.996191 | 1.415323939 | 1.477435949 | 1.425255569 |
| 110.514478 | 1.419582768 | 1.479328631 | 1.421986413 |
| 111.030131 | 1.424006968 | 1.48256928  | 1.419307494 |
| 111.5471   | 1.428596927 | 1.487119145 | 1.417248168 |
| 112.070673 | 1.433372484 | 1.492940668 | 1.415841202 |
| 112.070673 | 1.438332869 | 1.499969237 | 1.415141125 |
| 113.147595 | 1.44342274  | 1.508028443 | 1.415208649 |
| 113.690717 | 1.448510461 | 1.516752547 | 1.416066045 |
| 114.224314 | 1.453454342 | 1.525690955 | 1.417674709 |
| 114.74431  | 1.458172863 | 1.534460168 | 1.419958258 |
| 115.252718 | 1.462640893 | 1.542809838 | 1.422851681 |
| 115.755003 | 1.466871913 | 1.550564583 | 1.426325604 |
| 116.258061 | 1.470880554 | 1.557570583 | 1.43038818  |
| 116.768949 | 1.474670725 | 1.56365283  | 1.435076178 |
| 117.293335 | 1.478219289 | 1.568576468 | 1.440434328 |
| 117.833463 | 1.481455639 | 1.572054625 | 1.446483862 |
| 118.387071 | 1.484277133 | 1.573807806 | 1.453189007 |
| 118.948186 | 1.48656551  | 1.573649684 | 1.460445017 |
| 118.948186 | 1.488221441 | 1.571568002 | 1.468086375 |
| 120.058253 | 1.489187862 | 1.56773901  | 1.475915226 |
| 120.592992 | 1.489462594 | 1.56245003  | 1.483774409 |
| 121.111283 | 1.489077276 | 1.556012728 | 1.491566497 |
| 121.615237 | 1.488067838 | 1.548696385 | 1.499253178 |
| 122.109411 | 1.486462377 | 1.540698978 | 1.506842367 |
| 122.600154 | 1.484261126 | 1.532151949 | 1.514378543 |
| 123.094431 | 1.481439662 | 1.523147614 | 1.521912876 |
| 123.597672 | 1.477952635 | 1.513798339 | 1.529467463 |
| 124.110294 | 1.473778462 | 1.504331176 | 1.536976824 |
| 124.625325 | 1.468980749 | 1.495126479 | 1.544265544 |
| 125.132399 | 1.463692108 | 1.486599649 | 1.551120434 |
| 125.625367 | 1.458047499 | 1.479028037 | 1.557413335 |



|            |             |             |              |
|------------|-------------|-------------|--------------|
| 125.625367 | 1.452120235 | 1.472524966 | 1.563114012  |
| 126.573879 | 1.445930176 | 1.467117125 | 1.568244907  |
| 127.038773 | 1.439465458 | 1.462810544 | 1.572826003  |
| 127.50455  | 1.432700951 | 1.459630921 | 1.576861086  |
| 127.976359 | 1.425605988 | 1.457631364 | 1.580327094  |
| 128.458966 | 1.418155542 | 1.456896854 | 1.583165188  |
| 128.956134 | 1.410344769 | 1.457545205 | 1.585283161  |
| 129.468909 | 1.40222794  | 1.459709552 | 1.586545966  |
| 129.993257 | 1.393957509 | 1.46347213  | 1.586812139  |
| 130.520303 | 1.385777077 | 1.468791848 | 1.585978034  |
| 131.041304 | 1.377924448 | 1.475494226 | 1.584023812  |
| 131.551878 | 1.370553909 | 1.483355563 | 1.58098838   |
| 132.05169  | 1.363742309 | 1.492165642 | 1.576929254  |
| 132.05169  | 1.357524827 | 1.501740122 | 1.57188877   |
| 133.028718 | 1.351911504 | 1.511940568 | 1.565887564  |
| 133.514732 | 1.346910649 | 1.522663498 | 1.55890614   |
| 134.007049 | 1.342537406 | 1.533849121 | 1.550874075  |
| 134.512586 | 1.338838715 | 1.545436144 | 1.541680937  |
| 135.036703 | 1.335914254 | 1.557299993 | 1.531213421  |
| 135.578607 | 1.333927214 | 1.569130292 | 1.519492352  |
| 136.128052 | 1.333033169 | 1.580399028 | 1.506791442  |
| 136.671468 | 1.333296303 | 1.590586462 | 1.493553136  |
| 137.201957 | 1.334670594 | 1.599417436 | 1.480114566  |
| 137.720512 | 1.33708005  | 1.606851672 | 1.466618701  |
| 138.231688 | 1.340474128 | 1.612935309 | 1.453097999  |
| 138.740488 | 1.344828281 | 1.617731752 | 1.439562017  |
| 138.740488 | 1.350138717 | 1.621303714 | 1.426034201  |
| 139.768174 | 1.356409528 | 1.623707753 | 1.412574045  |
| 140.292546 | 1.363627136 | 1.625005576 | 1.399300473  |
| 140.822814 | 1.37171675  | 1.625267692 | 1.386456808  |
| 141.353174 | 1.380509036 | 1.624591286 | 1.37437665   |
| 141.877741 | 1.389796053 | 1.62310316  | 1.363369623  |
| 142.394211 | 1.399417981 | 1.620924365 | 1.353618201  |
| 142.903159 | 1.409273492 | 1.618147194 | 1.345224395  |
| 143.405778 | 1.419284978 | 1.61483805  | 1.338259979  |
| 143.903103 | 1.429385196 | 1.611047953 | 1.332787327  |
| 144.396608 | 1.439532744 | 1.60681082  | 1.328848319  |
| 144.888603 | 1.449710811 | 1.602145396 | 1.326470545  |
| 145.381745 | 1.459921672 | 1.597059419 | 1.325682187  |
| 145.381745 | 1.470160263 | 1.591562664 | 1.326514495  |
| 146.377345 | 1.48038463  | 1.585681077 | 1.328976262  |
| 146.877745 | 1.490511509 | 1.579470215 | 1.333027015  |
| 147.375249 | 1.500430009 | 1.573016347 | 1.338545546  |
| 147.866144 | 1.510036872 | 1.566402702 | 1.345341859  |
| 148.348508 | 1.519269122 | 1.559685374 | 1.353206567  |
| 148.822533 | 1.528111062 | 1.552887925 | 1.36195596   |
| 149.290086 | 1.536574076 | 1.545997779 | 1.3714443826 |
| 149.754334 | 1.544690721 | 1.538979256 | 1.381577858  |
| 150.21951  | 1.552502648 | 1.531775659 | 1.392308695  |
| 150.690448 | 1.560049421 | 1.524328529 | 1.40363003   |
| 151.171547 | 1.567344263 | 1.516586249 | 1.415535105  |
| 151.665326 | 1.574361121 | 1.508540317 | 1.427971454  |
| 151.665326 | 1.581029615 | 1.500240951 | 1.440810757  |
| 152.689264 | 1.587265643 | 1.491777128 | 1.453886258  |
| 153.21679  | 1.592999103 | 1.483244246 | 1.467025794  |
| 153.753433 | 1.598173802 | 1.474752442 | 1.480065766  |
| 154.296573 | 1.602726354 | 1.466454532 | 1.492805436  |
| 154.841515 | 1.606605219 | 1.458553714 | 1.505009993  |
| 155.384277 | 1.609788782 | 1.451243561 | 1.516487748  |
| 155.923812 | 1.612293898 | 1.444682059 | 1.527137475  |
| 156.46121  | 1.614154905 | 1.438998297 | 1.536921714  |
| 156.997441 | 1.615402824 | 1.434323502 | 1.545799077  |
| 157.531558 | 1.616075052 | 1.430779795 | 1.553717242  |
| 158.060603 | 1.616210637 | 1.428451927 | 1.560609907  |
| 158.581494 | 1.615866737 | 1.427354344 | 1.566444497  |
| 158.581494 | 1.615108626 | 1.427433249 | 1.571238554  |
| 159.596159 | 1.613994183 | 1.428603266 | 1.575035625  |
| 160.09298  | 1.612574252 | 1.430778474 | 1.577886524  |
| 160.586353 | 1.610889579 | 1.433898151 | 1.579832451  |

|            |             |             |             |
|------------|-------------|-------------|-------------|
| 161.079315 | 1.60897332  | 1.437934842 | 1.580898226 |
| 161.574328 | 1.606856869 | 1.442881112 | 1.581088529 |
| 162.071915 | 1.604577517 | 1.448720208 | 1.580401735 |
| 162.570103 | 1.60218927  | 1.455382736 | 1.578843449 |
| 163.06635  | 1.599751128 | 1.462759839 | 1.576445331 |
| 163.560737 | 1.597314303 | 1.470742796 | 1.573234117 |
| 164.05711  | 1.594909415 | 1.479278387 | 1.569214078 |
| 164.561122 | 1.592560879 | 1.488343632 | 1.564345284 |
| 165.076027 | 1.590313287 | 1.497868414 | 1.558595729 |
| 165.076027 | 1.588243816 | 1.507649785 | 1.552007344 |
| 166.120073 | 1.586440408 | 1.517379993 | 1.544728572 |
| 166.633665 | 1.584970617 | 1.526781508 | 1.536937526 |
| 167.137528 | 1.583866512 | 1.535704965 | 1.5287526   |
| 167.633569 | 1.583145462 | 1.544088183 | 1.520232492 |
| 168.12478  | 1.58282049  | 1.551890328 | 1.511406571 |
| 168.613745 | 1.5829141   | 1.559059866 | 1.50230461  |
| 169.102038 | 1.58344807  | 1.565520461 | 1.492965811 |
| 169.590172 | 1.584445762 | 1.571172815 | 1.483454994 |
| 170.077977 | 1.585926202 | 1.575902217 | 1.473847672 |
| 170.565277 | 1.587903622 | 1.579593829 | 1.464223573 |
| 171.052576 | 1.590394376 | 1.582144684 | 1.454646866 |
| 171.541179 | 1.59341522  | 1.583466314 | 1.445172013 |
| 171.541179 | 1.596991069 | 1.583494878 | 1.435851576 |
| 172.525377 | 1.601134622 | 1.582209998 | 1.426774343 |
| 173.017413 | 1.605832872 | 1.579669683 | 1.418069298 |
| 173.50412  | 1.611049087 | 1.576034949 | 1.40987026  |
| 173.983239 | 1.616753147 | 1.571514401 | 1.402260839 |
| 174.456405 | 1.622961845 | 1.566306965 | 1.395249838 |
| 174.928939 | 1.629753726 | 1.560558507 | 1.388794992 |
| 175.408768 | 1.637277438 | 1.554359238 | 1.382842387 |
| 175.904907 | 1.645743212 | 1.547788642 | 1.37736485  |
| 176.423921 | 1.655366704 | 1.540978876 | 1.372408206 |
| 176.962914 | 1.666207309 | 1.534231618 | 1.368125109 |
| 177.506635 | 1.678022241 | 1.528008852 | 1.36471359  |
| 178.039104 | 1.690444687 | 1.522700858 | 1.362255463 |
| 178.039104 | 1.70326026  | 1.518463339 | 1.360697077 |
| 179.055314 | 1.716428162 | 1.515312129 | 1.359938247 |
| 179.545884 | 1.729988515 | 1.513217878 | 1.359887804 |
| 180.029881 | 1.743972038 | 1.512143767 | 1.360482817 |
| 180.509321 | 1.758379847 | 1.512043702 | 1.361672557 |
| 180.985175 | 1.773187246 | 1.512852044 | 1.363409919 |
| 181.458519 | 1.788375686 | 1.514491536 | 1.365659353 |
| 181.931249 | 1.803961739 | 1.516880438 | 1.368387271 |
| 182.405574 | 1.819976741 | 1.519957598 | 1.371575966 |
| 182.882297 | 1.836408048 | 1.523674866 | 1.375199374 |
| 183.359005 | 1.853134673 | 1.52798479  | 1.379204694 |
| 183.83033  | 1.86991821  | 1.532813795 | 1.383503555 |
| 184.291095 | 1.886522294 | 1.538075473 | 1.387993177 |
| 184.291095 | 1.902827135 | 1.543697852 | 1.392598663 |
| 185.177191 | 1.918852695 | 1.549642774 | 1.397286132 |
| 185.608564 | 1.934712705 | 1.555902034 | 1.402055126 |
| 186.038783 | 1.950565413 | 1.562484256 | 1.406926307 |
| 186.473383 | 1.96658451  | 1.569406825 | 1.411930435 |
| 186.917566 | 1.982928814 | 1.576679056 | 1.417091665 |
| 187.374957 | 1.999699603 | 1.584267465 | 1.422420032 |
| 187.845452 | 2.016854956 | 1.592058939 | 1.427869356 |
| 188.323776 | 2.034169503 | 1.599830005 | 1.433336562 |
| 188.801954 | 2.051326969 | 1.607310767 | 1.438683848 |
| 189.274323 | 2.068111183 | 1.614280566 | 1.443816545 |
| 189.73969  | 2.084474259 | 1.620619498 | 1.448693862 |
| 190.199864 | 2.100483241 | 1.626257684 | 1.453318515 |
| 190.199864 | 2.116232893 | 1.631140747 | 1.457702122 |
| 191.114056 | 2.131792021 | 1.635206292 | 1.461848226 |
| 191.5705   | 2.147189109 | 1.638381845 | 1.465752309 |
| 192.026928 | 2.162444788 | 1.640601971 | 1.469412417 |
| 192.484295 | 2.177600773 | 1.641816632 | 1.472833302 |
| 192.944632 | 2.192732096 | 1.641982397 | 1.476025817 |
| 193.409847 | 2.207911687 | 1.641063729 | 1.479003915 |
| 193.87946  | 2.223128683 | 1.639050653 | 1.481763565 |

|            |             |             |             |
|------------|-------------|-------------|-------------|
| 194.349167 | 2.23824997  | 1.636000875 | 1.484287371 |
| 194.812603 | 2.253074473 | 1.632066782 | 1.486556548 |
| 195.265319 | 2.267466269 | 1.627442151 | 1.488575304 |
| 195.706878 | 2.281414097 | 1.622304718 | 1.490366464 |
| 196.139987 | 2.295004746 | 1.616775464 | 1.491968212 |
| 196.139987 | 2.308365145 | 1.61093308  | 1.493413567 |
| 196.997844 | 2.321629604 | 1.604829085 | 1.494733036 |
| 197.431338 | 2.334916237 | 1.598502651 | 1.495951049 |
| 197.872654 | 2.348314647 | 1.592001397 | 1.497085295 |
| 198.3233   | 2.361848217 | 1.58540449  | 1.498146473 |
| 198.781603 | 2.375450472 | 1.578845287 | 1.499140042 |
| 199.242456 | 2.388948859 | 1.572506637 | 1.500064438 |
| 199.699641 | 2.4021547   | 1.566570005 | 1.500918968 |
| 200.149185 | 2.414953712 | 1.561164207 | 1.501703119 |
| 200.590642 | 2.427338208 | 1.556348186 | 1.502427424 |
| 201.02609  | 2.439372192 | 1.552143355 | 1.503095324 |
| 201.45857  | 2.451145619 | 1.548553968 | 1.503711546 |
| 201.890934 | 2.46274114  | 1.545591277 | 1.504273497 |
| 201.890934 | 2.474218138 | 1.543269923 | 1.504772394 |
| 202.763039 | 2.485616766 | 1.541603666 | 1.505192809 |
| 203.205495 | 2.496973954 | 1.54059444  | 1.505515245 |
| 203.654415 | 2.508340099 | 1.540236727 | 1.505711481 |
| 204.111679 | 2.519767087 | 1.540520608 | 1.505748632 |
| 204.577817 | 2.531271306 | 1.541431429 | 1.505581527 |
| 205.050265 | 2.542799997 | 1.542952353 | 1.505164916 |
| 205.523557 | 2.554229902 | 1.545047946 | 1.504460568 |
| 205.992382 | 2.565449895 | 1.547671422 | 1.503437562 |
| 206.45457  | 2.576424498 | 1.550786749 | 1.502079215 |
| 206.911406 | 2.587198673 | 1.554377142 | 1.500361645 |
| 207.366297 | 2.597866116 | 1.558442651 | 1.498257409 |
| 207.823526 | 2.608538027 | 1.562996181 | 1.495721291 |
| 207.823526 | 2.61932403  | 1.568055329 | 1.492700814 |
| 208.76188  | 2.630313186 | 1.573629513 | 1.489138609 |
| 209.247792 | 2.641540071 | 1.579689794 | 1.484987164 |
| 209.741085 | 2.652912972 | 1.586126488 | 1.480260854 |
| 210.231901 | 2.664208881 | 1.592740624 | 1.475059221 |
| 210.710303 | 2.67520334  | 1.599322853 | 1.469532465 |
| 211.172309 | 2.685808176 | 1.60575521  | 1.463800224 |
| 211.619778 | 2.696068575 | 1.612017437 | 1.457907498 |
| 212.057103 | 2.706082228 | 1.61814895  | 1.45186736  |
| 212.488726 | 2.715948156 | 1.624195619 | 1.445674462 |
| 212.918112 | 2.725741681 | 1.63020162  | 1.439333243 |
| 213.347721 | 2.735514145 | 1.636203015 | 1.432861386 |
| 213.779544 | 2.745300011 | 1.642238372 | 1.426286618 |
| 213.779544 | 2.755135347 | 1.648352879 | 1.419642872 |
| 214.657761 | 2.765046598 | 1.65460528  | 1.412970639 |
| 215.106456 | 2.775031029 | 1.661052459 | 1.40634036  |
| 215.559467 | 2.785018681 | 1.667729963 | 1.399872298 |
| 216.01211  | 2.794891483 | 1.674648174 | 1.39371548  |
| 216.459812 | 2.804533493 | 1.681816342 | 1.388005427 |
| 216.900633 | 2.81389747  | 1.689262798 | 1.382826956 |
| 217.335562 | 2.822994625 | 1.697046234 | 1.378209817 |
| 217.767348 | 2.831878751 | 1.70524498  | 1.374174644 |
| 218.199366 | 2.840611625 | 1.713936014 | 1.370733723 |
| 218.635041 | 2.849252342 | 1.723193425 | 1.367915503 |
| 219.077587 | 2.857856573 | 1.733083696 | 1.365762327 |
| 219.529619 | 2.866460804 | 1.743652048 | 1.364333387 |
| 219.529619 | 2.875069678 | 1.754896911 | 1.363700664 |
| 220.462952 | 2.883629966 | 1.766717659 | 1.363929458 |
| 220.935729 | 2.892023003 | 1.778892293 | 1.365045851 |
| 221.402685 | 2.900115852 | 1.791139516 | 1.367005999 |
| 221.858781 | 2.907836553 | 1.803246401 | 1.36971947  |
| 222.303442 | 2.915194218 | 1.815132442 | 1.373093731 |
| 222.739092 | 2.922245213 | 1.826812276 | 1.37705681  |
| 223.169095 | 2.929061057 | 1.838341266 | 1.3815689   |
| 223.596497 | 2.935701702 | 1.849774778 | 1.3865953   |
| 224.023702 | 2.942214587 | 1.8611603   | 1.392110141 |
| 224.452787 | 2.948643293 | 1.872535405 | 1.398090561 |
| 224.88592  | 2.955029177 | 1.883938415 | 1.404520541 |

|            |             |             |             |
|------------|-------------|-------------|-------------|
| 225.325258 | 2.96141423  | 1.895409095 | 1.411385743 |
| 225.325258 | 2.967827355 | 1.90695405  | 1.418658571 |
| 226.224728 | 2.974261169 | 1.918517298 | 1.426267069 |
| 226.67948  | 2.980675234 | 1.929971156 | 1.434081438 |
| 227.13123  | 2.987017193 | 1.941177703 | 1.441952075 |
| 227.577031 | 2.993265726 | 1.952059683 | 1.449762274 |
| 228.016798 | 2.999436059 | 1.962612997 | 1.457454261 |
| 228.452218 | 3.005570942 | 1.972880071 | 1.465004503 |
| 228.885361 | 3.011713878 | 1.982915965 | 1.472402716 |
| 229.317911 | 3.017907131 | 1.992768893 | 1.479632621 |
| 229.75103  | 3.024183695 | 2.002477502 | 1.486671842 |
| 230.185577 | 3.030574245 | 2.012084137 | 1.493494552 |
| 230.62229  | 3.037104514 | 2.021633755 | 1.500070383 |
| 231.06161  | 3.043802126 | 2.031174934 | 1.506367254 |
| 231.06161  | 3.050673054 | 2.040738258 | 1.512339981 |
| 231.944421 | 3.057701083 | 2.050324888 | 1.517926843 |
| 232.382266 | 3.064839267 | 2.059900984 | 1.523062442 |
| 232.813409 | 3.072039463 | 2.069433467 | 1.527701145 |
| 233.236662 | 3.079281491 | 2.078918313 | 1.531830906 |
| 233.653001 | 3.086579432 | 2.088392853 | 1.535469731 |
| 234.064621 | 3.093966685 | 2.097914593 | 1.538639495 |
| 234.47399  | 3.101487813 | 2.107544276 | 1.541361653 |
| 234.883453 | 3.109182967 | 2.117336247 | 1.54364789  |
| 235.295333 | 3.117099809 | 2.1273492   | 1.545502272 |
| 235.712083 | 3.125288108 | 2.137644426 | 1.546922097 |
| 236.136026 | 3.133799655 | 2.148287977 | 1.547897897 |
| 236.568374 | 3.142662071 | 2.159321477 | 1.548410214 |
| 236.568374 | 3.151857333 | 2.170734467 | 1.548440629 |
| 237.450542 | 3.161299195 | 2.182440806 | 1.547982043 |
| 237.891335 | 3.170868808 | 2.194324708 | 1.547056265 |
| 238.326953 | 3.18048219  | 2.20630875  | 1.545694803 |
| 238.756883 | 3.190105703 | 2.218386373 | 1.543938233 |
| 239.182454 | 3.199749529 | 2.23059771  | 1.541816415 |
| 239.605482 | 3.209437123 | 2.242999396 | 1.539350488 |
| 240.027392 | 3.219180602 | 2.255634631 | 1.536562527 |
| 240.448951 | 3.228979971 | 2.2685291   | 1.533471976 |
| 240.870428 | 3.238821672 | 2.281689202 | 1.530105066 |
| 241.291916 | 3.248687762 | 2.295112606 | 1.526486463 |
| 241.713553 | 3.258562761 | 2.308798011 | 1.522641237 |
| 242.1355   | 3.268429023 | 2.322739087 | 1.518595469 |
| 242.1355   | 3.278268913 | 2.336922363 | 1.51437724  |
| 242.979849 | 3.288052287 | 2.351317959 | 1.51001718  |
| 243.401304 | 3.29775142  | 2.365892961 | 1.505549562 |
| 243.821797 | 3.307344034 | 2.380618254 | 1.501007598 |
| 244.24154  | 3.316817999 | 2.395486975 | 1.496415916 |
| 244.661207 | 3.3261776   | 2.410508345 | 1.491798426 |
| 245.081751 | 3.335430901 | 2.425709416 | 1.487169184 |
| 245.504455 | 3.34459528  | 2.441131269 | 1.482545334 |
| 245.931277 | 3.353702146 | 2.456848612 | 1.477932593 |
| 246.365119 | 3.362800853 | 2.47298031  | 1.473331395 |
| 246.809454 | 3.371951149 | 2.489676013 | 1.468738205 |
| 247.266802 | 3.381193665 | 2.50705905  | 1.464166178 |
| 247.736165 | 3.390496663 | 2.525123435 | 1.459665378 |
| 247.736165 | 3.399742788 | 2.543662558 | 1.455328596 |
| 248.684786 | 3.40879096  | 2.562360801 | 1.451261652 |
| 249.150801 | 3.417568641 | 2.580992029 | 1.447516458 |
| 249.609199 | 3.426106244 | 2.599500574 | 1.444104144 |
| 250.062256 | 3.434480185 | 2.617931467 | 1.441005628 |
| 250.512305 | 3.442773128 | 2.636327516 | 1.438211865 |
| 250.960306 | 3.451036077 | 2.654680082 | 1.435718361 |
| 251.405595 | 3.459288302 | 2.672913367 | 1.433532353 |
| 251.846507 | 3.467527431 | 2.690917511 | 1.43165951  |
| 252.281332 | 3.475735034 | 2.708588557 | 1.430097899 |
| 252.709001 | 3.483897734 | 2.725863108 | 1.428838818 |
| 253.129222 | 3.492004298 | 2.742718782 | 1.427863155 |
| 253.542206 | 3.500042422 | 2.759162194 | 1.427153705 |
| 253.542206 | 3.508001307 | 2.77521161  | 1.426687124 |
| 254.348144 | 3.515859136 | 2.790894069 | 1.426442779 |
| 254.742143 | 3.523601752 | 2.806245286 | 1.426398016 |

|            |             |             |             |
|------------|-------------|-------------|-------------|
| 255.131166 | 3.531215217 | 2.821307493 | 1.426533511 |
| 255.516245 | 3.538690694 | 2.836131723 | 1.426829045 |
| 255.898669 | 3.546027493 | 2.850778443 | 1.427267165 |
| 256.280114 | 3.55323172  | 2.865322197 | 1.427831771 |
| 256.662836 | 3.560321705 | 2.879851745 | 1.428510978 |
| 257.049805 | 3.567326344 | 2.894486722 | 1.429296949 |
| 257.444639 | 3.574285268 | 2.909359774 | 1.430183252 |
| 257.85119  | 3.581234053 | 2.924607466 | 1.431165143 |
| 258.272618 | 3.588191158 | 2.9403343   | 1.432239898 |
| 258.709894 | 3.595135141 | 2.956547999 | 1.43339174  |
| 258.709894 | 3.601991779 | 2.973117981 | 1.434598461 |
| 259.619118 | 3.608660368 | 2.989802562 | 1.435824896 |
| 260.080364 | 3.615060379 | 3.006356366 | 1.43703559  |
| 260.541297 | 3.621163356 | 3.022626584 | 1.438203823 |
| 261.001379 | 3.626985691 | 3.038543916 | 1.439312519 |
| 261.460925 | 3.63256081  | 3.054068065 | 1.440350006 |
| 261.919834 | 3.637922508 | 3.069150852 | 1.441302869 |
| 262.377283 | 3.643101309 | 3.083721003 | 1.442162508 |
| 262.832161 | 3.648128263 | 3.097710643 | 1.442918859 |
| 263.283671 | 3.653040255 | 3.11107004  | 1.443569924 |
| 263.731559 | 3.65787769  | 3.123778825 | 1.444113301 |
| 264.17586  | 3.662685226 | 3.135832423 | 1.444555494 |
| 264.616463 | 3.667496325 | 3.147230743 | 1.444899399 |
| 264.616463 | 3.672337292 | 3.15797251  | 1.445156362 |
| 265.484496 | 3.677225197 | 3.168057014 | 1.445338073 |
| 265.91038  | 3.682163363 | 3.177494616 | 1.445458876 |
| 266.329716 | 3.687148914 | 3.186296251 | 1.445536704 |
| 266.741785 | 3.692172519 | 3.194486078 | 1.445591228 |
| 267.146484 | 3.697224019 | 3.202100699 | 1.445640432 |
| 267.544739 | 3.702302861 | 3.209195108 | 1.445702339 |
| 267.938506 | 3.707422099 | 3.215837574 | 1.445794748 |
| 268.33041  | 3.712599758 | 3.222101107 | 1.445936634 |
| 268.723239 | 3.717860339 | 3.228048389 | 1.446144747 |
| 269.119463 | 3.72322267  | 3.23373602  | 1.446440304 |
| 269.52086  | 3.728697721 | 3.23920296  | 1.446842752 |
| 269.928321 | 3.734284066 | 3.244478321 | 1.447374251 |
| 269.928321 | 3.73996832  | 3.249583766 | 1.448054011 |
| 270.761397 | 3.745734081 | 3.254540886 | 1.448901424 |
| 271.186416 | 3.751564151 | 3.259375142 | 1.449929737 |
| 271.616966 | 3.757448014 | 3.264122131 | 1.451154188 |
| 272.052982 | 3.763378507 | 3.268817187 | 1.452583093 |
| 272.493769 | 3.769339112 | 3.273487279 | 1.454224162 |
| 272.937608 | 3.775307184 | 3.278151247 | 1.456067209 |
| 273.381986 | 3.781248628 | 3.282817042 | 1.458098587 |
| 273.824432 | 3.787138903 | 3.287484404 | 1.460295445 |
| 274.263455 | 3.792968407 | 3.292156717 | 1.462632005 |
| 274.698978 | 3.79874788  | 3.296847748 | 1.465084888 |
| 275.132132 | 3.804509303 | 3.301573485 | 1.467640622 |
| 275.56459  | 3.810294219 | 3.306355587 | 1.470282451 |
| 275.56459  | 3.816142328 | 3.311205733 | 1.472994234 |
| 276.431883 | 3.822081829 | 3.316120102 | 1.475747521 |
| 276.865764 | 3.828123915 | 3.321079089 | 1.478504315 |
| 277.296983 | 3.834258165 | 3.326042188 | 1.481217341 |
| 277.723083 | 3.840476174 | 3.330964875 | 1.483836528 |
| 278.142905 | 3.846773693 | 3.33581411  | 1.486324801 |
| 278.557178 | 3.853179433 | 3.340576785 | 1.488659026 |
| 278.968164 | 3.859736477 | 3.345253099 | 1.490824086 |
| 279.378886 | 3.866502859 | 3.349845171 | 1.492808564 |
| 279.792333 | 3.873540061 | 3.35435842  | 1.494596791 |
| 280.210806 | 3.880894463 | 3.358787271 | 1.496163516 |
| 280.635489 | 3.888597282 | 3.363122886 | 1.497480513 |
| 281.066366 | 3.896650668 | 3.367353417 | 1.498505725 |
| 281.066366 | 3.905036579 | 3.37147951  | 1.499199968 |
| 281.942816 | 3.913724377 | 3.375513751 | 1.499525939 |
| 282.386044 | 3.922674188 | 3.379491212 | 1.499451604 |
| 282.83103  | 3.931846211 | 3.383460846 | 1.498952268 |
| 283.276292 | 3.941186516 | 3.387474626 | 1.498011654 |
| 283.719954 | 3.950632443 | 3.391588743 | 1.496621607 |
| 284.160097 | 3.960114574 | 3.395855884 | 1.494791106 |

|            |             |             |             |
|------------|-------------|-------------|-------------|
| 284.595343 | 3.969578834 | 3.400322382 | 1.492534165 |
| 285.025306 | 3.978992707 | 3.405043115 | 1.489868432 |
| 285.450664 | 3.988347958 | 3.410075962 | 1.486812269 |
| 285.872863 | 3.997654825 | 3.415486129 | 1.483373105 |
| 286.293593 | 4.006930891 | 3.42134825  | 1.479558148 |
| 286.714168 | 4.016189112 | 3.427736742 | 1.475374623 |
| 286.714168 | 4.025421161 | 3.434713867 | 1.470843665 |
| 287.555172 | 4.034591383 | 3.442318152 | 1.465999882 |
| 287.972935 | 4.043652835 | 3.450553481 | 1.460903746 |
| 288.386431 | 4.052551634 | 3.459391817 | 1.455621423 |
| 288.794825 | 4.061264235 | 3.468798995 | 1.450213375 |
| 289.198734 | 4.069802924 | 3.478745346 | 1.444724191 |
| 289.599967 | 4.078203099 | 3.489220916 | 1.439180712 |
| 290.000944 | 4.086515326 | 3.500222684 | 1.433601494 |
| 290.404153 | 4.094793003 | 3.511752493 | 1.428004018 |
| 290.81177  | 4.103084459 | 3.523799871 | 1.4224196   |
| 291.225473 | 4.111425819 | 3.536341631 | 1.416887893 |
| 291.646423 | 4.119850468 | 3.54933005  | 1.4114651   |
| 292.075349 | 4.128377605 | 3.562703402 | 1.406223726 |
| 292.075349 | 4.137030746 | 3.576384626 | 1.401244685 |
| 292.958049 | 4.145820615 | 3.590279885 | 1.396620276 |
| 293.410738 | 4.154743281 | 3.604269492 | 1.392457788 |
| 293.868295 | 4.163768015 | 3.61820755  | 1.388866595 |
| 294.326738 | 4.172826455 | 3.631918959 | 1.385947506 |
| 294.781184 | 4.181826508 | 3.645231891 | 1.383777702 |
| 295.227379 | 4.190679524 | 3.658031804 | 1.382388132 |
| 295.663028 | 4.199330368 | 3.670291798 | 1.381768648 |
| 296.088112 | 4.207760798 | 3.682064065 | 1.381883532 |
| 296.504366 | 4.215987599 | 3.69346305  | 1.382694848 |
| 296.914487 | 4.224042573 | 3.704635837 | 1.384167693 |
| 297.321374 | 4.231960542 | 3.715735965 | 1.38628511  |
| 297.727485 | 4.239764978 | 3.726910071 | 1.389033957 |
| 297.727485 | 4.24745878  | 3.738284328 | 1.392402398 |
| 298.542036 | 4.255023397 | 3.749950738 | 1.396367494 |
| 298.94994  | 4.262422327 | 3.761963553 | 1.400889867 |
| 299.357163 | 4.269621138 | 3.77435032  | 1.405917121 |
| 299.763553 | 4.276603455 | 3.787132007 | 1.411399482 |
| 300.169856 | 4.283368901 | 3.800330054 | 1.417293457 |
| 300.577354 | 4.289933178 | 3.813952997 | 1.423565055 |
| 300.98734  | 4.29630753  | 3.827991327 | 1.430184102 |
| 301.400806 | 4.302504627 | 3.842407209 | 1.43711384  |
| 301.818418 | 4.308529978 | 3.857133764 | 1.444309958 |
| 302.240635 | 4.314391467 | 3.872089323 | 1.451726413 |
| 302.667713 | 4.320098675 | 3.887172203 | 1.459307199 |
| 303.099559 | 4.32566131  | 3.902264457 | 1.466991866 |
| 303.099559 | 4.331089228 | 3.917227503 | 1.474710465 |
| 303.974935 | 4.336393832 | 3.931907408 | 1.482386723 |
| 304.416429 | 4.341590833 | 3.946148181 | 1.489941169 |
| 304.85872  | 4.346701245 | 3.959798135 | 1.497296731 |
| 305.300161 | 4.35174325  | 3.972711281 | 1.504377047 |
| 305.73898  | 4.35673735  | 3.984767652 | 1.511110256 |
| 306.173765 | 4.3617051   | 3.995880625 | 1.517440727 |
| 306.603983 | 4.366673022 | 4.006025032 | 1.523332034 |
| 307.030197 | 4.371671749 | 4.015220863 | 1.528772026 |
| 307.453854 | 4.376734718 | 4.023525618 | 1.533756618 |
| 307.876703 | 4.381894535 | 4.031016798 | 1.538284214 |
| 308.299979 | 4.387166239 | 4.037781616 | 1.542344668 |
| 308.723582 | 4.392545153 | 4.043898034 | 1.545915322 |
| 308.723582 | 4.397988814 | 4.04944839  | 1.548968751 |
| 309.563981 | 4.403442115 | 4.054513696 | 1.551480844 |
| 309.976136 | 4.408850487 | 4.059185129 | 1.553452507 |
| 310.382007 | 4.41417803  | 4.063545829 | 1.554900134 |
| 310.783127 | 4.41941236  | 4.067667394 | 1.555848498 |
| 311.182106 | 4.424562455 | 4.071596653 | 1.556320216 |
| 311.581887 | 4.429632726 | 4.07535682  | 1.556328217 |
| 311.985281 | 4.4346325   | 4.078951626 | 1.555871684 |
| 312.394815 | 4.439560466 | 4.082373159 | 1.554944652 |
| 312.812772 | 4.444413849 | 4.08560512  | 1.55353216  |
| 313.241174 | 4.449180767 | 4.088637556 | 1.551609676 |

|            |             |             |             |
|------------|-------------|-------------|-------------|
| 313.68141  | 4.453842381 | 4.091457014 | 1.54915418  |
| 314.13346  | 4.458367444 | 4.09405525  | 1.546146679 |
| 314.13346  | 4.462707347 | 4.096425621 | 1.542587904 |
| 315.062696 | 4.466809785 | 4.098559465 | 1.538509677 |
| 315.530958 | 4.470632116 | 4.100459997 | 1.533968765 |
| 315.995197 | 4.474156305 | 4.102130031 | 1.529040143 |
| 316.45162  | 4.477384328 | 4.103574597 | 1.523808218 |
| 316.898104 | 4.480345809 | 4.104801368 | 1.518345357 |
| 317.334518 | 4.483089574 | 4.105817182 | 1.512705366 |
| 317.762582 | 4.485676112 | 4.106632743 | 1.506914873 |
| 318.185363 | 4.488175702 | 4.107254962 | 1.500977626 |
| 318.606558 | 4.490663149 | 4.107693721 | 1.494885551 |
| 319.029522 | 4.493214603 | 4.107957292 | 1.48862771  |
| 319.455973 | 4.495905546 | 4.108048988 | 1.48222094  |
| 319.884748 | 4.498795152 | 4.107974822 | 1.475732244 |
| 319.884748 | 4.501923679 | 4.107739601 | 1.469268559 |
| 320.733077 | 4.505313386 | 4.107339399 | 1.462948154 |
| 321.145745 | 4.508976964 | 4.106759548 | 1.456854899 |
| 321.550158 | 4.512935197 | 4.105975638 | 1.451024892 |
| 321.948249 | 4.517211531 | 4.104947199 | 1.445465946 |
| 322.342525 | 4.521831958 | 4.103630051 | 1.440178321 |
| 322.73547  | 4.526816691 | 4.101988125 | 1.435160598 |
| 323.129424 | 4.532181377 | 4.099986419 | 1.430420796 |
| 323.526704 | 4.537942334 | 4.097603086 | 1.425968301 |
| 323.92975  | 4.544110085 | 4.094827206 | 1.421819454 |
| 324.341084 | 4.550699414 | 4.091662654 | 1.417996645 |
| 324.762901 | 4.557715631 | 4.088129703 | 1.414533895 |
| 325.196179 | 4.565133738 | 4.084280236 | 1.41148077  |
| 325.196179 | 4.572887838 | 4.080211363 | 1.408900417 |
| 326.088719 | 4.580848619 | 4.0760695   | 1.406855943 |
| 326.537755 | 4.588854492 | 4.072025373 | 1.405388948 |
| 326.981112 | 4.596755161 | 4.068236479 | 1.404500791 |
| 327.415323 | 4.604446199 | 4.064819913 | 1.404158943 |
| 327.83926  | 4.611874822 | 4.061848313 | 1.404315799 |
| 328.253659 | 4.619033222 | 4.05936073  | 1.404918238 |
| 328.660537 | 4.625940886 | 4.057375342 | 1.405925134 |
| 329.062746 | 4.632635496 | 4.055903251 | 1.407299616 |
| 329.463604 | 4.639161531 | 4.054959773 | 1.409022372 |
| 329.866441 | 4.645564301 | 4.054567261 | 1.411087588 |
| 330.273863 | 4.651875265 | 4.05475425  | 1.413485464 |
| 330.686703 | 4.658095686 | 4.055545236 | 1.41620725  |
| 330.686703 | 4.664197971 | 4.056940892 | 1.419222426 |
| 331.520072 | 4.670129994 | 4.058898414 | 1.422476523 |
| 331.933907 | 4.675854621 | 4.061330612 | 1.425913375 |
| 332.343718 | 4.68137086  | 4.064132299 | 1.429487218 |
| 332.750615 | 4.686708072 | 4.067205297 | 1.433176293 |
| 333.156998 | 4.691913212 | 4.070456068 | 1.436970277 |
| 333.565819 | 4.697037274 | 4.073802298 | 1.440869324 |
| 333.980326 | 4.7021347   | 4.07716359  | 1.444875142 |
| 334.404113 | 4.707261539 | 4.080463784 | 1.448994571 |
| 334.841189 | 4.712476656 | 4.083621835 | 1.453235481 |
| 335.295565 | 4.717839096 | 4.086549953 | 1.457596335 |
| 335.769651 | 4.723388733 | 4.089138083 | 1.462051481 |
| 336.261101 | 4.72910882  | 4.091265331 | 1.466521901 |
| 336.261101 | 4.734898089 | 4.092830919 | 1.470863201 |
| 337.254621 | 4.740610039 | 4.093812796 | 1.474912142 |
| 337.733779 | 4.746131786 | 4.094294307 | 1.478565294 |
| 338.194581 | 4.751422967 | 4.094414321 | 1.481792668 |
| 338.638201 | 4.756490576 | 4.094325155 | 1.484611433 |
| 339.067944 | 4.761367428 | 4.094169978 | 1.487052187 |
| 339.487927 | 4.766094621 | 4.09407671  | 1.489148307 |
| 339.902532 | 4.770714376 | 4.0941695   | 1.490929219 |
| 340.316101 | 4.775268539 | 4.094572619 | 1.492412685 |
| 340.732472 | 4.779794039 | 4.095417473 | 1.493610302 |
| 341.154072 | 4.784308529 | 4.096846799 | 1.494521398 |
| 341.580695 | 4.788804719 | 4.098997657 | 1.495136387 |
| 342.009064 | 4.793245164 | 4.101976994 | 1.495452738 |
| 342.009064 | 4.797582854 | 4.105840536 | 1.495474306 |
| 342.853708 | 4.801787936 | 4.110601757 | 1.495219731 |

|            |             |             |             |
|------------|-------------|-------------|-------------|
| 343.266121 | 4.805865662 | 4.116266688 | 1.494710931 |
| 343.673249 | 4.809842728 | 4.12284721  | 1.493963253 |
| 344.077585 | 4.813754886 | 4.130371064 | 1.492990788 |
| 344.481905 | 4.81764334  | 4.13887209  | 1.491794371 |
| 344.889042 | 4.821552326 | 4.148394095 | 1.490373842 |
| 345.301894 | 4.82552912  | 4.158979249 | 1.48872207  |
| 345.723407 | 4.82962818  | 4.170673227 | 1.486831596 |
| 346.156309 | 4.83390986  | 4.183504945 | 1.484693597 |
| 346.602324 | 4.838434952 | 4.19745644  | 1.482304873 |
| 347.060837 | 4.843252569 | 4.212404448 | 1.479687347 |
| 347.527749 | 4.848379105 | 4.228069311 | 1.476894814 |
| 347.527749 | 4.853796667 | 4.244042832 | 1.474012817 |
| 348.458827 | 4.859463267 | 4.259906292 | 1.471140743 |
| 348.911203 | 4.865342137 | 4.275356538 | 1.468364041 |
| 349.351614 | 4.871409746 | 4.290242167 | 1.465742311 |
| 349.780795 | 4.877658252 | 4.304537899 | 1.463313018 |
| 350.201015 | 4.884095666 | 4.318304935 | 1.461096426 |
| 350.615489 | 4.890738967 | 4.331655799 | 1.459105122 |
| 351.027988 | 4.897619148 | 4.344735807 | 1.457345427 |
| 351.442461 | 4.904767434 | 4.357705407 | 1.455829013 |
| 351.86241  | 4.912211354 | 4.370714141 | 1.454569717 |
| 352.289821 | 4.919949844 | 4.383880619 | 1.453587328 |
| 352.723882 | 4.927925411 | 4.39724317  | 1.452908809 |
| 353.160703 | 4.936015202 | 4.410756399 | 1.452551958 |
| 353.160703 | 4.944079369 | 4.424333108 | 1.452515511 |
| 354.024007 | 4.952009104 | 4.437925702 | 1.452781863 |
| 354.446635 | 4.959757895 | 4.45155628  | 1.453324761 |
| 354.864945 | 4.967334512 | 4.46530731  | 1.454120481 |
| 355.282135 | 4.974771178 | 4.479295    | 1.455147907 |
| 355.70206  | 4.982118532 | 4.493651364 | 1.456402023 |
| 356.128971 | 4.989430165 | 4.508517292 | 1.457880195 |
| 356.567387 | 4.996766187 | 4.524039928 | 1.459586789 |
| 357.021665 | 5.004178352 | 4.540347763 | 1.461531797 |
| 357.494468 | 5.011691868 | 4.557495452 | 1.463717705 |
| 357.983462 | 5.019260649 | 4.575327089 | 1.466118437 |
| 358.478642 | 5.026738049 | 4.593376971 | 1.46866365  |
| 358.966237 | 5.033948726 | 4.611027392 | 1.471249808 |
| 358.966237 | 5.040804961 | 4.627839013 | 1.473793464 |
| 359.888785 | 5.047329669 | 4.643664489 | 1.476255242 |
| 360.323935 | 5.053603982 | 4.658534126 | 1.478621239 |
| 360.746276 | 5.059731038 | 4.672547021 | 1.480892742 |
| 361.160033 | 5.06581072  | 4.68581644  | 1.483075492 |
| 361.569511 | 5.071950777 | 4.698449524 | 1.485174851 |
| 361.979003 | 5.078258238 | 4.710545519 | 1.487196793 |
| 362.3925   | 5.08485024  | 4.722178735 | 1.489137503 |
| 362.812928 | 5.09182973  | 4.733372097 | 1.490987425 |
| 363.240865 | 5.099274468 | 4.744071854 | 1.492719085 |
| 363.673497 | 5.107199382 | 4.754136608 | 1.494288544 |
| 364.105423 | 5.115553607 | 4.763390759 | 1.495652677 |
| 364.531567 | 5.124262259 | 4.771699887 | 1.496774526 |
| 364.531567 | 5.133275833 | 4.779030316 | 1.497636816 |
| 365.360159 | 5.142589856 | 4.78542912  | 1.498235845 |
| 365.765667 | 5.152235072 | 4.790978362 | 1.498566431 |
| 366.169253 | 5.162257431 | 4.79577687  | 1.498625594 |
| 366.574299 | 5.172714992 | 4.799924226 | 1.498398839 |
| 366.984303 | 5.183676314 | 4.803527868 | 1.497867123 |
| 367.402965 | 5.195209404 | 4.806706389 | 1.497001603 |
| 367.834285 | 5.207398748 | 4.809602404 | 1.495758625 |
| 368.282302 | 5.220322424 | 4.812387845 | 1.494087402 |
| 368.74967  | 5.23401139  | 4.815278411 | 1.491928409 |
| 369.234288 | 5.248343366 | 4.818519528 | 1.489242099 |
| 369.726173 | 5.262939532 | 4.822330009 | 1.486061417 |
| 370.211128 | 5.27729528  | 4.826844361 | 1.482489975 |
| 370.211128 | 5.291053794 | 4.832107499 | 1.478650357 |
| 371.12951  | 5.30411101  | 4.838120326 | 1.474626282 |
| 371.563714 | 5.316516946 | 4.84488127  | 1.470455664 |
| 371.986545 | 5.328383647 | 4.852394091 | 1.46615164  |
| 372.402831 | 5.339832636 | 4.860666629 | 1.461709754 |
| 372.817519 | 5.350991239 | 4.86972553  | 1.457117673 |



|            |             |             |             |
|------------|-------------|-------------|-------------|
| 373.235539 | 5.361975593 | 4.879601554 | 1.452356692 |
| 373.661362 | 5.372892171 | 4.890317569 | 1.447414633 |
| 374.097856 | 5.383795346 | 4.901841577 | 1.442298657 |
| 374.544433 | 5.394659298 | 4.914019035 | 1.43706923  |
| 374.99604  | 5.40535546  | 4.926531269 | 1.431846303 |
| 375.445528 | 5.415725984 | 4.938985883 | 1.426780087 |
| 375.88811  | 5.425678847 | 4.951074031 | 1.421984381 |
| 375.88811  | 5.435225057 | 4.962644977 | 1.417518877 |
| 376.753396 | 5.444426507 | 4.973665594 | 1.413408029 |
| 377.182145 | 5.453358315 | 4.984155075 | 1.409670277 |
| 377.612856 | 5.462078025 | 4.994154104 | 1.406332109 |
| 378.048392 | 5.470615514 | 5.003697282 | 1.403436409 |
| 378.49101  | 5.478973073 | 5.012824079 | 1.401040972 |
| 378.942456 | 5.487130867 | 5.021584811 | 1.399212019 |
| 379.403876 | 5.495042208 | 5.030037097 | 1.398027143 |
| 379.87503  | 5.502629825 | 5.038243737 | 1.397567954 |
| 380.352559 | 5.509768544 | 5.046247529 | 1.397900343 |
| 380.828902 | 5.51629516  | 5.054052714 | 1.399046795 |
| 381.294979 | 5.522070569 | 5.061654435 | 1.400955395 |
| 381.745239 | 5.52705598  | 5.069094741 | 1.403525222 |
| 381.745239 | 5.531295929 | 5.076472471 | 1.406659635 |
| 382.600895 | 5.534872124 | 5.08392329  | 1.410289463 |
| 383.014185 | 5.537867304 | 5.091591479 | 1.414382041 |
| 383.424172 | 5.540343444 | 5.099623312 | 1.418924567 |
| 383.835472 | 5.542347887 | 5.108160885 | 1.423921077 |
| 384.252138 | 5.543906125 | 5.11734494  | 1.42938317  |
| 384.67697  | 5.54503328  | 5.127292157 | 1.435312384 |
| 385.110313 | 5.545736139 | 5.138058396 | 1.441674197 |
| 385.548979 | 5.54603142  | 5.14959241  | 1.448367678 |
| 385.987075 | 5.545956865 | 5.161731935 | 1.455237319 |
| 386.419181 | 5.545577947 | 5.174278729 | 1.462124971 |
| 386.843019 | 5.544967325 | 5.187092044 | 1.468922761 |
| 387.259488 | 5.544196301 | 5.200115905 | 1.475581117 |
| 387.259488 | 5.543329949 | 5.213345471 | 1.482088461 |
| 388.081126 | 5.542425208 | 5.226793483 | 1.488438438 |
| 388.49213  | 5.54154592  | 5.240460961 | 1.494622624 |
| 388.906417 | 5.5407542   | 5.254325379 | 1.5006229   |
| 389.325691 | 5.540125182 | 5.268330673 | 1.506408262 |
| 389.751174 | 5.539739656 | 5.282391289 | 1.51193582  |
| 390.183661 | 5.539689077 | 5.296385395 | 1.517149868 |
| 390.623415 | 5.540068142 | 5.31015852  | 1.521985171 |
| 391.069662 | 5.540975718 | 5.323516111 | 1.526364802 |
| 391.519783 | 5.542492667 | 5.336216398 | 1.530199206 |
| 391.968994 | 5.544664837 | 5.348001416 | 1.533396244 |
| 392.411721 | 5.547485104 | 5.358660634 | 1.535895521 |
| 392.844074 | 5.550910599 | 5.36811793  | 1.537681045 |
| 392.844074 | 5.55488104  | 5.37642546  | 1.538773465 |
| 393.676819 | 5.559349873 | 5.383724846 | 1.539206548 |
| 394.08198  | 5.564289022 | 5.390191302 | 1.539009418 |
| 394.484334 | 5.569684474 | 5.396015488 | 1.538195351 |
| 394.887551 | 5.57553513  | 5.401393985 | 1.536759585 |
| 395.29491  | 5.581843544 | 5.406535091 | 1.534683879 |
| 395.708617 | 5.588599962 | 5.411656289 | 1.531943552 |
| 396.128829 | 5.595758173 | 5.4169785   | 1.528523581 |
| 396.553038 | 5.603225981 | 5.42270912  | 1.524445377 |
| 396.976982 | 5.610868666 | 5.429014471 | 1.51976861  |
| 397.396991 | 5.618562511 | 5.436026377 | 1.514581919 |
| 397.811777 | 5.626233503 | 5.443851162 | 1.508955507 |
| 398.222385 | 5.633856247 | 5.452584196 | 1.502937693 |
| 398.222385 | 5.641442387 | 5.462321854 | 1.496549995 |
| 399.040527 | 5.649010006 | 5.473142828 | 1.489804166 |
| 399.453028 | 5.656581966 | 5.485110927 | 1.482712026 |
| 399.870421 | 5.664172735 | 5.498261808 | 1.475292256 |
| 400.294016 | 5.671792806 | 5.512594683 | 1.467578408 |
| 400.724592 | 5.679444991 | 5.52806558  | 1.459618871 |
| 401.162351 | 5.687131516 | 5.544585623 | 1.451479586 |
| 401.606676 | 5.694841662 | 5.562002164 | 1.443253972 |
| 402.055608 | 5.702549025 | 5.580077828 | 1.435062494 |
| 402.505326 | 5.710205168 | 5.59847314  | 1.427069272 |

|            |             |             |             |
|------------|-------------|-------------|-------------|
| 402.950604 | 5.717738683 | 5.616772402 | 1.419449006 |
| 403.386768 | 5.725093334 | 5.634589194 | 1.412352107 |
| 403.811753 | 5.732253464 | 5.651670549 | 1.405858151 |
| 403.811753 | 5.739247688 | 5.66792036  | 1.399990565 |
| 404.634149 | 5.746141748 | 5.683350919 | 1.394734908 |
| 405.038603 | 5.753005172 | 5.698031049 | 1.390075661 |
| 405.444176 | 5.759914144 | 5.71204777  | 1.386008421 |
| 405.854985 | 5.766936627 | 5.725496153 | 1.382549498 |
| 406.274467 | 5.774123461 | 5.738461936 | 1.379746265 |
| 406.704335 | 5.781491286 | 5.751007296 | 1.3776713   |
| 407.143004 | 5.788991595 | 5.763145848 | 1.37641734  |
| 407.584899 | 5.796503022 | 5.774832602 | 1.376053612 |
| 408.02276  | 5.803872694 | 5.786032137 | 1.376595169 |
| 408.45172  | 5.810992513 | 5.796784149 | 1.377991641 |
| 408.871101 | 5.817825904 | 5.80722572  | 1.380173681 |
| 409.283265 | 5.824392339 | 5.817543903 | 1.383085209 |
| 409.283265 | 5.830728054 | 5.827936883 | 1.386692494 |
| 410.100398 | 5.836868466 | 5.838606158 | 1.390980641 |
| 410.512428 | 5.842834665 | 5.849738292 | 1.395953193 |
| 410.930616 | 5.84863515  | 5.861520862 | 1.401611501 |
| 411.357098 | 5.854265006 | 5.874132979 | 1.407959465 |
| 411.793245 | 5.859701712 | 5.887744979 | 1.414985363 |
| 412.239331 | 5.864909502 | 5.902498136 | 1.422650776 |
| 412.6939   | 5.869832588 | 5.91845711  | 1.430878521 |
| 413.153073 | 5.874400649 | 5.935563219 | 1.439523869 |
| 413.610722 | 5.878543659 | 5.953592769 | 1.448386453 |
| 414.060388 | 5.882215926 | 5.97220694  | 1.457242968 |
| 414.49795  | 5.885420135 | 5.99108053  | 1.465925619 |
| 414.922788 | 5.888194596 | 6.009990146 | 1.474341529 |
| 414.922788 | 5.890604157 | 6.02883009  | 1.482472714 |
| 415.744346 | 5.892713959 | 6.047575915 | 1.49033295  |
| 416.148709 | 5.894591069 | 6.066246545 | 1.497954416 |
| 416.554353 | 5.896296868 | 6.084873644 | 1.505364134 |
| 416.96537  | 5.897895004 | 6.1034967   | 1.512581018 |
| 417.385499 | 5.899455702 | 6.122131431 | 1.51960406  |
| 417.817294 | 5.901053637 | 6.140723923 | 1.526396473 |
| 418.260426 | 5.902771031 | 6.15908468  | 1.532867202 |
| 418.710168 | 5.904681434 | 6.176845768 | 1.538866985 |
| 419.158902 | 5.90683719  | 6.193585267 | 1.544235172 |
| 419.600679 | 5.909270383 | 6.209026249 | 1.54887679  |
| 420.033946 | 5.912005071 | 6.223134214 | 1.552775674 |
| 420.460541 | 5.915062052 | 6.236029471 | 1.555953764 |
| 420.460541 | 5.918455857 | 6.24789344  | 1.558435399 |
| 421.306166 | 5.92219338  | 6.258924767 | 1.560229059 |
| 421.730965 | 5.926272138 | 6.269312358 | 1.561326279 |
| 422.159919 | 5.930677281 | 6.279263408 | 1.561706362 |
| 422.594375 | 5.935382059 | 6.288986989 | 1.561339523 |
| 423.034862 | 5.940350413 | 6.298693599 | 1.560191031 |
| 423.480609 | 5.945525684 | 6.308578826 | 1.558236221 |
| 423.928918 | 5.950832798 | 6.31878833  | 1.555475742 |
| 424.375086 | 5.956173241 | 6.329384163 | 1.551950247 |
| 424.813748 | 5.961452683 | 6.340349786 | 1.547744089 |
| 425.241092 | 5.966603811 | 6.351622362 | 1.542966346 |
| 425.656132 | 5.971599807 | 6.363150995 | 1.537709527 |
| 426.060338 | 5.976455709 | 6.374920469 | 1.532034434 |
| 426.060338 | 5.981204343 | 6.386944354 | 1.525972538 |
| 426.848161 | 5.985890472 | 6.399264879 | 1.519527283 |
| 427.238603 | 5.990560623 | 6.411939575 | 1.512692052 |
| 427.631413 | 5.995262732 | 6.425050236 | 1.505443971 |
| 428.030076 | 6.000047172 | 6.438691852 | 1.497752008 |
| 428.437702 | 6.004963996 | 6.452954851 | 1.489593998 |
| 428.856007 | 6.010043905 | 6.467885437 | 1.480973545 |
| 429.283658 | 6.015292177 | 6.483407124 | 1.471970399 |
| 429.715462 | 6.020660706 | 6.499281076 | 1.462762234 |
| 430.144681 | 6.026082121 | 6.515187742 | 1.453571433 |
| 430.56709  | 6.031517854 | 6.530882001 | 1.444569034 |
| 430.9826   | 6.036976777 | 6.546277757 | 1.435831131 |
| 431.394032 | 6.042503092 | 6.561394785 | 1.427369804 |
| 431.394032 | 6.048161256 | 6.57629674  | 1.419172438 |

|            |             |             |             |
|------------|-------------|-------------|-------------|
| 432.220694 | 6.054018006 | 6.591046399 | 1.411229493 |
| 432.643921 | 6.060137926 | 6.605678231 | 1.403559995 |
| 433.07841  | 6.066580405 | 6.620196313 | 1.396202735 |
| 433.527125 | 6.073401556 | 6.63457082  | 1.389233353 |
| 433.992415 | 6.080635938 | 6.64872463  | 1.382759103 |
| 434.475179 | 6.088289811 | 6.66252298  | 1.376931099 |
| 434.97272  | 6.096295734 | 6.675728422 | 1.371953878 |
| 435.476044 | 6.104456863 | 6.6879889   | 1.36804907  |
| 435.971298 | 6.112484201 | 6.698961361 | 1.365373111 |
| 436.447334 | 6.120132052 | 6.70851495  | 1.363928368 |
| 436.900816 | 6.127291093 | 6.716787803 | 1.363599829 |
| 437.334429 | 6.133963545 | 6.724058335 | 1.364248421 |
| 437.334429 | 6.14020277  | 6.730637965 | 1.365765753 |
| 438.163444 | 6.146065626 | 6.736828339 | 1.368086559 |
| 438.570455 | 6.151609933 | 6.742916558 | 1.371190714 |
| 438.980376 | 6.156881069 | 6.749193717 | 1.375098445 |
| 439.39921  | 6.161910564 | 6.755967779 | 1.379863672 |
| 439.832107 | 6.166702165 | 6.763569628 | 1.385569091 |
| 440.28062  | 6.171204551 | 6.772304068 | 1.392255617 |
| 440.738921 | 6.175301766 | 6.782323622 | 1.399836595 |
| 441.194803 | 6.178860404 | 6.793538711 | 1.408047597 |
| 441.637874 | 6.181826647 | 6.805712662 | 1.416588877 |
| 442.064959 | 6.184230808 | 6.818657431 | 1.42526309  |
| 442.478259 | 6.186143178 | 6.83228115  | 1.433996002 |
| 442.881927 | 6.187637796 | 6.846546363 | 1.4427751   |
| 442.881927 | 6.188772049 | 6.861434804 | 1.451610264 |
| 443.677157 | 6.189589576 | 6.876922718 | 1.460516938 |
| 444.076317 | 6.190128291 | 6.892970338 | 1.469506516 |
| 444.481252 | 6.190418215 | 6.909520268 | 1.478591374 |
| 444.895593 | 6.19048758  | 6.926498344 | 1.487776506 |
| 445.322927 | 6.190362162 | 6.94378132  | 1.497057739 |
| 445.765879 | 6.190074874 | 6.961163871 | 1.506390616 |
| 446.223873 | 6.189662088 | 6.978271027 | 1.515651083 |
| 446.69053  | 6.189177251 | 6.994529794 | 1.524597511 |
| 447.154779 | 6.188680309 | 7.009330826 | 1.532931951 |
| 447.607013 | 6.188224516 | 7.022329212 | 1.540445654 |
| 448.043592 | 6.187840295 | 7.033531015 | 1.547082691 |
| 448.46602  | 6.187538624 | 7.043170716 | 1.552892432 |
| 448.46602  | 6.187325005 | 7.051544686 | 1.557954866 |
| 449.285771 | 6.187198717 | 7.058952769 | 1.562348346 |
| 449.693888 | 6.187161098 | 7.065673824 | 1.566129478 |
| 450.1091   | 6.187213483 | 7.071973266 | 1.569333692 |
| 450.538195 | 6.18736502  | 7.078117073 | 1.571959664 |
| 450.986754 | 6.187627233 | 7.084368283 | 1.573962925 |
| 451.45477  | 6.188012379 | 7.090949518 | 1.57525468  |
| 451.932213 | 6.18852197  | 7.097969225 | 1.575748531 |
| 452.403817 | 6.189142495 | 7.105424209 | 1.575440538 |
| 452.860382 | 6.189855757 | 7.113307261 | 1.574413719 |
| 453.301587 | 6.190655948 | 7.121674277 | 1.57276671  |
| 453.731636 | 6.191544663 | 7.130621998 | 1.570568815 |
| 454.155641 | 6.192535537 | 7.140261697 | 1.567857178 |
| 454.155641 | 6.193644393 | 7.150697437 | 1.564644241 |
| 455.003279 | 6.194891676 | 7.16202663  | 1.560931571 |
| 455.43414  | 6.196303596 | 7.17433078  | 1.556713241 |
| 455.873684 | 6.197909369 | 7.18767571  | 1.55197882  |
| 456.324306 | 6.199747093 | 7.20210201  | 1.546718342 |
| 456.787051 | 6.201854899 | 7.217582543 | 1.540943554 |
| 457.25957  | 6.204259281 | 7.233937279 | 1.534716998 |
| 457.734198 | 6.206957401 | 7.250745906 | 1.52819549  |
| 458.200081 | 6.209905653 | 7.267427202 | 1.521597685 |
| 458.649355 | 6.213055602 | 7.283498695 | 1.515115735 |
| 459.08036  | 6.216386452 | 7.298734745 | 1.508845418 |
| 459.49593  | 6.219901812 | 7.313103414 | 1.502800328 |
| 459.900833 | 6.22363581  | 7.326672526 | 1.49695688  |
| 459.900833 | 6.227638923 | 7.33953026  | 1.491279448 |
| 460.700776 | 6.231978999 | 7.351774577 | 1.485722192 |
| 461.107941 | 6.236752029 | 7.363488366 | 1.480243333 |
| 461.528604 | 6.242075813 | 7.374722957 | 1.47480766  |
| 461.96809  | 6.248077695 | 7.385453006 | 1.469418503 |

|            |             |             |             |
|------------|-------------|-------------|-------------|
| 462.4265   | 6.254825637 | 7.395503281 | 1.464154654 |
| 462.894605 | 6.262231843 | 7.40455834  | 1.459201245 |
| 463.357679 | 6.270065269 | 7.412347538 | 1.454759675 |
| 463.805838 | 6.278113027 | 7.418859968 | 1.450920984 |
| 464.237526 | 6.286278482 | 7.424284185 | 1.44767454  |
| 464.65594  | 6.29455707  | 7.428873721 | 1.444961591 |
| 465.06559  | 6.302983252 | 7.432870052 | 1.442726324 |
| 465.470901 | 6.3116046   | 7.436492718 | 1.44092512  |
| 465.470901 | 6.320471172 | 7.439937723 | 1.439531776 |
| 466.284729 | 6.329643628 | 7.443404955 | 1.438529895 |
| 466.701254 | 6.339188311 | 7.447095465 | 1.437915612 |
| 467.129906 | 6.349183196 | 7.451232151 | 1.437697285 |
| 467.575082 | 6.359713437 | 7.456054451 | 1.437893505 |
| 468.039721 | 6.370827015 | 7.4618034   | 1.438526919 |
| 468.521573 | 6.382444001 | 7.468644433 | 1.439615031 |
| 469.009458 | 6.394259112 | 7.476531597 | 1.441116364 |
| 469.487403 | 6.405851476 | 7.485180634 | 1.442935845 |
| 469.945351 | 6.416948528 | 7.49426846  | 1.4449571   |
| 470.382648 | 6.42751498  | 7.503593698 | 1.447103462 |
| 470.804097 | 6.43765387  | 7.513077613 | 1.449334    |
| 471.2163   | 6.447518575 | 7.522709953 | 1.45163523  |
| 471.2163   | 6.457267973 | 7.532507556 | 1.454010856 |
| 472.040796 | 6.467058134 | 7.542484729 | 1.456464657 |
| 472.466491 | 6.477031412 | 7.552632618 | 1.459007842 |
| 472.90782  | 6.487279744 | 7.562854153 | 1.461628348 |
| 473.364181 | 6.497771336 | 7.572890594 | 1.46428248  |
| 473.827477 | 6.508300684 | 7.58231394  | 1.466875605 |
| 474.285709 | 6.518579976 | 7.590692862 | 1.469299042 |
| 474.730596 | 6.528410703 | 7.597793502 | 1.471481484 |
| 475.160372 | 6.537741115 | 7.603596197 | 1.473397594 |
| 475.577357 | 6.546605399 | 7.608182663 | 1.475049845 |
| 475.985209 | 6.555062262 | 7.611662255 | 1.476443156 |
| 476.387613 | 6.563159017 | 7.614127438 | 1.477582288 |
| 476.787956 | 6.570930044 | 7.615655822 | 1.478466257 |
| 476.787956 | 6.578392444 | 7.616304421 | 1.479084045 |
| 477.595106 | 6.585550457 | 7.616111854 | 1.479421274 |
| 478.008195 | 6.592397471 | 7.61510094  | 1.479457866 |
| 478.431813 | 6.598906876 | 7.613275542 | 1.479162989 |
| 478.868298 | 6.605024477 | 7.610640905 | 1.478503361 |
| 479.317398 | 6.610648309 | 7.607235499 | 1.477447427 |
| 479.773843 | 6.615628314 | 7.603196156 | 1.475987636 |
| 480.227737 | 6.619811783 | 7.598791045 | 1.474159825 |
| 480.670126 | 6.623127564 | 7.594350129 | 1.472034759 |
| 481.097918 | 6.625608606 | 7.590151466 | 1.469679568 |
| 481.513366 | 6.627325501 | 7.58638915  | 1.467129586 |
| 481.921332 | 6.628351982 | 7.583195615 | 1.464399578 |
| 482.327476 | 6.628726012 | 7.580683998 | 1.461486233 |
| 482.327476 | 6.628461169 | 7.578967971 | 1.458373193 |
| 483.157193 | 6.62753552  | 7.578179105 | 1.45504097  |
| 483.590774 | 6.625905713 | 7.5784735   | 1.451476207 |
| 484.039806 | 6.62353022  | 7.580002285 | 1.447689711 |
| 484.500336 | 6.62040656  | 7.582856974 | 1.443746541 |
| 484.963234 | 6.616615347 | 7.586972283 | 1.439760472 |
| 485.419101 | 6.612299326 | 7.592131027 | 1.435850531 |
| 485.863053 | 6.607598246 | 7.598059847 | 1.432090915 |
| 486.294947 | 6.602616158 | 7.604506372 | 1.428505658 |
| 486.717219 | 6.59741367  | 7.611266368 | 1.425093833 |
| 487.13319  | 6.59202919  | 7.618160506 | 1.421847614 |
| 487.546379 | 6.586484204 | 7.62501754  | 1.418758153 |
| 487.960351 | 6.580796644 | 7.631660518 | 1.415818262 |
| 487.960351 | 6.574977579 | 7.637895472 | 1.413032487 |
| 488.804797 | 6.569038544 | 7.643489737 | 1.410409451 |
| 489.241434 | 6.563007148 | 7.648175436 | 1.407973343 |
| 489.689851 | 6.556936908 | 7.651646207 | 1.405771192 |
| 490.148245 | 6.550924844 | 7.653621342 | 1.403865441 |
| 490.610412 | 6.545122402 | 7.653933752 | 1.402332338 |
| 491.066759 | 6.539697579 | 7.65263858  | 1.401235652 |
| 491.509059 | 6.534770503 | 7.650008909 | 1.400596144 |
| 491.934618 | 6.530373128 | 7.646406055 | 1.400396988 |

|            |             |             |             |
|------------|-------------|-------------|-------------|
| 492.345847 | 6.526466834 | 7.642150858 | 1.400610464 |
| 492.747632 | 6.522999618 | 7.63749095  | 1.40121589  |
| 493.145448 | 6.519925808 | 7.632621668 | 1.402213528 |
| 493.544573 | 6.517216695 | 7.627711194 | 1.403613527 |
| 493.544573 | 6.514866765 | 7.622935028 | 1.405447278 |
| 494.364921 | 6.512887594 | 7.618496352 | 1.407752789 |
| 494.792048 | 6.511313644 | 7.614642428 | 1.410563294 |
| 495.230311 | 6.510191252 | 7.611663898 | 1.413891831 |
| 495.67541  | 6.509560627 | 7.60984463  | 1.417710807 |
| 496.12081  | 6.509435154 | 7.609382862 | 1.421943691 |
| 496.560445 | 6.509793655 | 7.61034426  | 1.426491367 |
| 496.990967 | 6.510592672 | 7.61266276  | 1.431263661 |
| 497.412071 | 6.511779461 | 7.616203536 | 1.436205861 |
| 497.825481 | 6.513312232 | 7.620806073 | 1.441283772 |
| 498.233876 | 6.515157075 | 7.626304688 | 1.44648664  |
| 498.640259 | 6.517292292 | 7.632535895 | 1.451816668 |
| 499.047635 | 6.51970669  | 7.639330226 | 1.457279206 |
| 499.047635 | 6.522389256 | 7.646513047 | 1.462880342 |
| 499.875763 | 6.525334739 | 7.653890632 | 1.468617677 |
| 500.299832 | 6.528529375 | 7.661252759 | 1.474480957 |
| 500.730941 | 6.531952404 | 7.668388221 | 1.480432717 |
| 501.167763 | 6.535568346 | 7.675094769 | 1.486421711 |
| 501.607492 | 6.539328154 | 7.681205593 | 1.492373231 |
| 502.04595  | 6.543165628 | 7.686598249 | 1.498198861 |
| 502.478978 | 6.547014465 | 7.691213778 | 1.503819471 |
| 502.904649 | 6.550830762 | 7.695066749 | 1.509188192 |
| 503.324188 | 6.554598653 | 7.698224166 | 1.514306078 |
| 503.741174 | 6.558329849 | 7.700769505 | 1.519206678 |
| 504.160251 | 6.562041125 | 7.702788202 | 1.523927097 |
| 504.586067 | 6.565754711 | 7.704359032 | 1.528496143 |
| 504.586067 | 6.569473807 | 7.705563293 | 1.532927723 |
| 505.470133 | 6.57318173  | 7.706500088 | 1.537201755 |
| 505.92755  | 6.576828044 | 7.707291376 | 1.541264529 |
| 506.388997 | 6.580339545 | 7.70809073  | 1.545041593 |
| 506.847636 | 6.58364229  | 7.709066631 | 1.548462526 |
| 507.298097 | 6.586682734 | 7.710369309 | 1.551487787 |
| 507.738343 | 6.589444059 | 7.712127243 | 1.554111001 |
| 508.16968  | 6.591931969 | 7.714442757 | 1.556351391 |
| 508.595507 | 6.594166118 | 7.717408193 | 1.558228993 |
| 509.019925 | 6.596163841 | 7.721111924 | 1.559756028 |
| 509.446754 | 6.597933858 | 7.725642275 | 1.560934824 |
| 509.878847 | 6.599475219 | 7.731073634 | 1.561745387 |
| 510.317505 | 6.600783021 | 7.737463146 | 1.562161685 |
| 510.317505 | 6.601840402 | 7.744830084 | 1.562150886 |
| 511.210123 | 6.602638445 | 7.753158539 | 1.561686956 |
| 511.658471 | 6.603175226 | 7.76239771  | 1.560757658 |
| 512.104583 | 6.603457506 | 7.77250057  | 1.559365057 |
| 512.546622 | 6.603503688 | 7.783405651 | 1.557522954 |
| 512.982724 | 6.603338719 | 7.79501948  | 1.555257372 |
| 513.410972 | 6.602986262 | 7.807199351 | 1.552604302 |
| 513.830657 | 6.602481451 | 7.819797242 | 1.549600733 |
| 514.243296 | 6.601849699 | 7.832706595 | 1.546269036 |
| 514.652349 | 6.601114308 | 7.845877446 | 1.542606617 |
| 515.062209 | 6.600291979 | 7.859287717 | 1.538593433 |
| 515.477166 | 6.599401754 | 7.872908087 | 1.534192563 |
| 515.900378 | 6.598466365 | 7.886655267 | 1.529370338 |
| 515.900378 | 6.597513801 | 7.900355212 | 1.524112976 |
| 516.772238 | 6.596587632 | 7.913732114 | 1.518445259 |
| 517.214378 | 6.595736392 | 7.926458278 | 1.512434257 |
| 517.654208 | 6.595005517 | 7.938252061 | 1.506164575 |
| 518.087881 | 6.594426988 | 7.948938329 | 1.499717987 |
| 518.513377 | 6.594021959 | 7.958452742 | 1.493158508 |
| 518.930619 | 6.593801591 | 7.966827176 | 1.486515031 |
| 519.341264 | 6.593764593 | 7.974143773 | 1.479791795 |
| 519.748208 | 6.593913442 | 7.980509617 | 1.472967536 |
| 520.154995 | 6.594249518 | 7.986024862 | 1.466003785 |
| 520.565225 | 6.594776033 | 7.990771831 | 1.458858538 |
| 520.981896 | 6.595498639 | 7.994821271 | 1.451499764 |
| 521.406558 | 6.596424691 | 7.998237172 | 1.443921619 |

|            |             |             |             |
|------------|-------------|-------------|-------------|
| 521.406558 | 6.597553086 | 8.001110558 | 1.436161612 |
| 522.275311 | 6.59887269  | 8.003581006 | 1.428300064 |
| 522.713856 | 6.600367634 | 8.005846778 | 1.420423481 |
| 523.153157 | 6.602026553 | 8.008157744 | 1.412592335 |
| 523.5943   | 6.603843803 | 8.010781546 | 1.404829927 |
| 524.038874 | 6.605820733 | 8.013973256 | 1.397153557 |
| 524.486844 | 6.607955974 | 8.017949806 | 1.38961596  |
| 524.936261 | 6.610239613 | 8.022851938 | 1.382303443 |
| 525.385464 | 6.612661354 | 8.028751932 | 1.375299314 |
| 525.835041 | 6.615226379 | 8.035681597 | 1.368652285 |
| 526.287376 | 6.617951214 | 8.043653018 | 1.362390032 |
| 526.744664 | 6.620858516 | 8.052641615 | 1.35655296  |
| 527.2071   | 6.623960028 | 8.062545119 | 1.351223378 |
| 527.2071   | 6.627250032 | 8.073158524 | 1.346506686 |
| 528.137723 | 6.630717099 | 8.084200992 | 1.342503564 |
| 528.599822 | 6.634346435 | 8.095358885 | 1.339293229 |
| 529.056708 | 6.638124364 | 8.106327406 | 1.336923365 |
| 529.507141 | 6.642040629 | 8.116822667 | 1.335412795 |
| 529.95136  | 6.646093976 | 8.126605608 | 1.334762251 |
| 530.391435 | 6.650299676 | 8.135490409 | 1.33496296  |
| 530.830761 | 6.654683984 | 8.143316901 | 1.336018426 |
| 531.272931 | 6.659279171 | 8.149918709 | 1.337949672 |
| 531.720324 | 6.664103686 | 8.15511769  | 1.340785782 |
| 532.172573 | 6.669139047 | 8.158743695 | 1.344539079 |
| 532.625804 | 6.674324524 | 8.160717336 | 1.349165982 |
| 533.074118 | 6.679559879 | 8.161120528 | 1.354556971 |
| 533.074118 | 6.684754081 | 8.160196171 | 1.360577047 |
| 533.941863 | 6.689860811 | 8.158263592 | 1.367120563 |
| 534.363063 | 6.694875615 | 8.155631527 | 1.374133619 |
| 534.780569 | 6.69981158  | 8.152575713 | 1.381608548 |
| 535.197753 | 6.704675969 | 8.149351429 | 1.389545785 |
| 535.616281 | 6.709459298 | 8.146217868 | 1.397922048 |
| 536.036164 | 6.71413193  | 8.143445588 | 1.406689634 |
| 536.457011 | 6.71865997  | 8.141294401 | 1.415785649 |
| 536.879186 | 6.723022275 | 8.140005868 | 1.42516638  |
| 537.303723 | 6.727209695 | 8.139805687 | 1.434801226 |
| 537.731315 | 6.73120371  | 8.140900207 | 1.444654429 |
| 538.161491 | 6.734984101 | 8.143463427 | 1.454663106 |
| 538.59275  | 6.738523814 | 8.147602376 | 1.464739109 |
| 538.59275  | 6.741800964 | 8.153350489 | 1.474788035 |
| 539.45238  | 6.744805001 | 8.160664555 | 1.484733066 |
| 539.879049 | 6.747533404 | 8.169436248 | 1.494511739 |
| 540.303334 | 6.749992785 | 8.179506861 | 1.504075439 |
| 540.725797 | 6.752188388 | 8.190688641 | 1.513399036 |
| 541.147935 | 6.754134662 | 8.202788441 | 1.522473031 |
| 541.572139 | 6.755843074 | 8.215621086 | 1.531311997 |
| 542.001191 | 6.757321927 | 8.229007618 | 1.539930899 |
| 542.437404 | 6.75857064  | 8.24274396  | 1.548336431 |
| 542.881531 | 6.759578525 | 8.256582583 | 1.556495558 |
| 543.331858 | 6.760329664 | 8.270221651 | 1.564341276 |
| 543.784317 | 6.76080774  | 8.283339707 | 1.571778226 |
| 544.234331 | 6.76100531  | 8.295685474 | 1.578725096 |
| 544.234331 | 6.760924777 | 8.307143583 | 1.585157404 |
| 545.120656 | 6.760571163 | 8.317739557 | 1.591106059 |
| 545.561971 | 6.759943733 | 8.327594771 | 1.596642024 |
| 546.008937 | 6.759029856 | 8.336851365 | 1.601836768 |
| 546.466027 | 6.757807372 | 8.345629976 | 1.606731128 |
| 546.93317  | 6.756266819 | 8.353976284 | 1.611309516 |
| 547.403973 | 6.754429471 | 8.361874765 | 1.615499555 |
| 547.869772 | 6.75234696  | 8.369323563 | 1.619234877 |
| 548.325387 | 6.750076519 | 8.376413525 | 1.622499504 |
| 548.770057 | 6.747655455 | 8.383300424 | 1.625316751 |
| 549.205497 | 6.745112631 | 8.390163083 | 1.627722491 |
| 549.634429 | 6.742462408 | 8.397172983 | 1.629750369 |
| 550.059859 | 6.739708657 | 8.404500106 | 1.631421726 |
| 550.059859 | 6.736856469 | 8.412300389 | 1.632749288 |
| 550.910402 | 6.733912711 | 8.420710313 | 1.633733833 |
| 551.338764 | 6.730885004 | 8.429844802 | 1.634367332 |
| 551.770653 | 6.727784616 | 8.439801933 | 1.634638825 |

|            |             |             |             |
|------------|-------------|-------------|-------------|
| 552.207731 | 6.724614397 | 8.450682683 | 1.63452839  |
| 552.652393 | 6.721376376 | 8.462598227 | 1.634013638 |
| 553.106813 | 6.71807254  | 8.475655769 | 1.633060131 |
| 553.571076 | 6.714721841 | 8.48989884  | 1.631628894 |
| 554.04137  | 6.711373021 | 8.505232979 | 1.629701393 |
| 554.510182 | 6.708099176 | 8.521387613 | 1.62728968  |
| 554.96962  | 6.704970925 | 8.538013452 | 1.624447377 |
| 555.415369 | 6.702025021 | 8.554822927 | 1.621227157 |
| 555.847876 | 6.699261788 | 8.571676351 | 1.617663559 |
| 555.847876 | 6.696656705 | 8.588571983 | 1.613756333 |
| 556.690528 | 6.694174758 | 8.605579514 | 1.609471387 |
| 557.112606 | 6.691782158 | 8.622801635 | 1.604747982 |
| 557.54326  | 6.689446702 | 8.64031115  | 1.599505239 |
| 557.986377 | 6.687155642 | 8.658069105 | 1.59366924  |
| 558.440908 | 6.684915275 | 8.675811135 | 1.587224914 |
| 558.899591 | 6.682767105 | 8.693034168 | 1.580263069 |
| 559.353034 | 6.680750117 | 8.709220364 | 1.572938665 |
| 559.795569 | 6.678884681 | 8.724096443 | 1.565381426 |
| 560.226574 | 6.677171918 | 8.737645536 | 1.557645837 |
| 560.648323 | 6.675602472 | 8.749988854 | 1.549734033 |
| 561.06384  | 6.674171638 | 8.761291129 | 1.541620482 |
| 561.475764 | 6.672880928 | 8.771711367 | 1.533284179 |
| 561.475764 | 6.671739683 | 8.781405567 | 1.524706997 |
| 562.296043 | 6.670759478 | 8.790526208 | 1.515881022 |
| 562.707207 | 6.669954678 | 8.799241512 | 1.506794945 |
| 563.121112 | 6.669343165 | 8.807731172 | 1.497433256 |
| 563.539353 | 6.66894387  | 8.816192319 | 1.487780982 |
| 563.962924 | 6.668777885 | 8.824830126 | 1.477836308 |
| 564.391618 | 6.668866856 | 8.833838788 | 1.467631213 |
| 564.823775 | 6.669230488 | 8.843392323 | 1.457240505 |
| 565.256559 | 6.66987311  | 8.853623561 | 1.446771673 |
| 565.686705 | 6.670796698 | 8.864610691 | 1.436354061 |
| 566.111628 | 6.67198656  | 8.876386147 | 1.426097891 |
| 566.530451 | 6.673430837 | 8.888969795 | 1.416076831 |
| 566.944385 | 6.675116028 | 8.902395338 | 1.406313496 |
| 566.944385 | 6.677044472 | 8.916735121 | 1.396789369 |
| 567.770835 | 6.679228117 | 8.932105131 | 1.387466352 |
| 568.192391 | 6.681689949 | 8.948652283 | 1.378306768 |
| 568.625469 | 6.684457539 | 8.966509936 | 1.369309234 |
| 569.071607 | 6.687545501 | 8.985692154 | 1.360549928 |
| 569.526416 | 6.69092143  | 9.005911281 | 1.352230833 |
| 569.980058 | 6.694496778 | 9.026579171 | 1.344619183 |
| 570.423865 | 6.698174224 | 9.047114475 | 1.337905639 |
| 570.855475 | 6.701900086 | 9.067227519 | 1.332128267 |
| 571.277733 | 6.70566953  | 9.086897502 | 1.327237133 |
| 571.695631 | 6.709498077 | 9.106228013 | 1.323172239 |
| 572.114376 | 6.713414832 | 9.125341181 | 1.319902653 |
| 572.538431 | 6.717438459 | 9.144321708 | 1.317431433 |
| 572.538431 | 6.72157979  | 9.163187475 | 1.31579411  |
| 573.412938 | 6.72582877  | 9.181868648 | 1.315049919 |
| 573.863833 | 6.730148603 | 9.200225396 | 1.315254142 |
| 574.321278 | 6.734490474 | 9.218083505 | 1.316443793 |
| 574.782131 | 6.738794653 | 9.235276784 | 1.318625583 |
| 575.243145 | 6.743001272 | 9.251685193 | 1.321766707 |
| 575.701724 | 6.747062773 | 9.267255085 | 1.325809766 |
| 576.156234 | 6.750942426 | 9.2820014   | 1.330681634 |
| 576.605668 | 6.754615198 | 9.295981894 | 1.336303313 |
| 577.049311 | 6.758065197 | 9.309277416 | 1.342596686 |
| 577.487037 | 6.761280644 | 9.321997785 | 1.34948323  |
| 577.919954 | 6.764266414 | 9.334293227 | 1.356912311 |
| 578.350694 | 6.767032556 | 9.346355498 | 1.36486537  |
| 578.350694 | 6.769597899 | 9.358408004 | 1.373366819 |
| 579.222022 | 6.771976155 | 9.370701021 | 1.382467182 |
| 579.67135  | 6.774169018 | 9.383483489 | 1.392226485 |
| 580.132783 | 6.776162494 | 9.396942517 | 1.402650575 |
| 580.602251 | 6.777914919 | 9.411096142 | 1.413606783 |
| 581.069734 | 6.779381057 | 9.425735798 | 1.424802299 |
| 581.525323 | 6.780538263 | 9.440567439 | 1.435925371 |
| 581.965288 | 6.781397952 | 9.455412802 | 1.446812877 |

|            |             |             |             |
|------------|-------------|-------------|-------------|
| 582.391641 | 6.781986385 | 9.470245286 | 1.457452454 |
| 582.808771 | 6.782324188 | 9.485097969 | 1.467906635 |
| 583.221139 | 6.782421617 | 9.500004863 | 1.47825108  |
| 583.632322 | 6.782280742 | 9.514950007 | 1.488544051 |
| 584.044769 | 6.781889319 | 9.529861095 | 1.498816439 |
| 584.044769 | 6.78123453  | 9.544606381 | 1.509078925 |
| 584.878329 | 6.780299132 | 9.559001644 | 1.519319959 |
| 585.300175 | 6.779063841 | 9.572830967 | 1.529517507 |
| 585.725133 | 6.777509447 | 9.585861232 | 1.539639139 |
| 586.152685 | 6.775619635 | 9.597869402 | 1.549651029 |
| 586.582368 | 6.773376968 | 9.608659194 | 1.559518353 |
| 587.013914 | 6.770769769 | 9.618090802 | 1.569211949 |
| 587.447008 | 6.767790476 | 9.626079891 | 1.578702355 |
| 587.880864 | 6.764441029 | 9.632593731 | 1.587949242 |
| 588.314244 | 6.760738731 | 9.637666248 | 1.596907517 |
| 588.746194 | 6.75670468  | 9.641400232 | 1.605538304 |
| 589.176905 | 6.752363895 | 9.643955294 | 1.613830277 |
| 589.607881 | 6.747726787 | 9.645522904 | 1.621797168 |
| 589.607881 | 6.74279796  | 9.646304527 | 1.629461076 |
| 590.479313 | 6.73758632  | 9.646504659 | 1.636830915 |
| 590.922261 | 6.732118048 | 9.646339486 | 1.643889235 |
| 591.368408 | 6.726451589 | 9.646030919 | 1.650584322 |
| 591.813529 | 6.720687057 | 9.645804168 | 1.656839513 |
| 592.252594 | 6.71492936  | 9.645856767 | 1.662583461 |
| 592.682354 | 6.709267114 | 9.646338119 | 1.667791719 |
| 593.102706 | 6.703739342 | 9.647347383 | 1.672481486 |
| 593.516074 | 6.698347238 | 9.648949331 | 1.676700506 |
| 593.925977 | 6.693074634 | 9.651192363 | 1.680494567 |
| 594.335825 | 6.687906732 | 9.654111477 | 1.683896443 |
| 594.748055 | 6.68284449  | 9.657714621 | 1.686918245 |
| 595.163572 | 6.677912015 | 9.661976857 | 1.689552843 |
| 595.163572 | 6.673149751 | 9.666820073 | 1.691778869 |
| 596.000384 | 6.668614755 | 9.672121821 | 1.693573484 |
| 596.417866 | 6.664356949 | 9.677734138 | 1.6949205   |
| 596.832862 | 6.660414442 | 9.683523028 | 1.6958092   |
| 597.24536  | 6.656810801 | 9.689399075 | 1.696235802 |
| 597.656548 | 6.653554527 | 9.695325942 | 1.696195449 |
| 598.068508 | 6.650650936 | 9.701320256 | 1.695671955 |
| 598.483666 | 6.648109732 | 9.707434914 | 1.694642134 |
| 598.904171 | 6.645942666 | 9.713737075 | 1.693068619 |
| 599.331486 | 6.644172493 | 9.720296212 | 1.690906077 |
| 599.766479 | 6.642821729 | 9.727171464 | 1.688104476 |
| 600.209844 | 6.641912545 | 9.734412911 | 1.684611995 |
| 600.662238 | 6.641462073 | 9.742055519 | 1.680367513 |
| 600.662238 | 6.641480314 | 9.750115254 | 1.675318308 |
| 601.592626 | 6.641965459 | 9.758568441 | 1.66943181  |
| 602.065213 | 6.642899193 | 9.767337742 | 1.662720715 |
| 602.535649 | 6.644233759 | 9.776300891 | 1.655262231 |
| 602.997349 | 6.645902787 | 9.785315145 | 1.647183746 |
| 603.445506 | 6.647830382 | 9.794268529 | 1.63863053  |
| 603.87912  | 6.649956513 | 9.803121074 | 1.629694193 |
| 604.300616 | 6.65224701  | 9.811909324 | 1.620391564 |
| 604.714022 | 6.65469087  | 9.820702443 | 1.610692961 |
| 605.123346 | 6.657284919 | 9.829568449 | 1.600543363 |
| 605.531588 | 6.660029469 | 9.838556365 | 1.589897039 |
| 605.940254 | 6.662916374 | 9.8476735   | 1.578737139 |
| 606.349322 | 6.665929372 | 9.856892798 | 1.567090361 |
| 606.349322 | 6.669042304 | 9.866171144 | 1.555016368 |
| 607.164114 | 6.672223437 | 9.875487758 | 1.542593012 |
| 607.567778 | 6.675445569 | 9.884857132 | 1.52988399  |
| 607.96899  | 6.67868623  | 9.89436533  | 1.516929583 |
| 608.36913  | 6.681928665 | 9.90415601  | 1.503730426 |
| 608.770429 | 6.685169107 | 9.914412947 | 1.49026193  |
| 609.175511 | 6.688397621 | 9.925340248 | 1.476482227 |
| 609.586791 | 6.691600104 | 9.937135798 | 1.462361587 |
| 610.005822 | 6.694752538 | 9.9499486   | 1.447908748 |
| 610.43284  | 6.69780841  | 9.963851419 | 1.433191703 |
| 610.866781 | 6.700710335 | 9.978811019 | 1.418337137 |
| 611.305695 | 6.703388889 | 9.994692705 | 1.403519881 |



|            |             |             |             |
|------------|-------------|-------------|-------------|
| 611.747179 | 6.70577253  | 10.01127664 | 1.388940764 |
| 611.747179 | 6.707793204 | 10.02828867 | 1.374806841 |
| 612.629049 | 6.709392241 | 10.04545852 | 1.361304465 |
| 613.067467 | 6.710525649 | 10.06255172 | 1.348572196 |
| 613.50496  | 6.711154644 | 10.07939613 | 1.336725519 |
| 613.942612 | 6.711245108 | 10.09583553 | 1.325880625 |
| 614.380847 | 6.71076625  | 10.11170808 | 1.316172992 |
| 614.81947  | 6.709701777 | 10.12684683 | 1.307754581 |
| 615.258586 | 6.708046637 | 10.14111179 | 1.300763214 |
| 615.699251 | 6.705801376 | 10.15443839 | 1.295312857 |
| 616.143019 | 6.702975087 | 10.16674252 | 1.291512548 |
| 616.590628 | 6.699587965 | 10.17794804 | 1.289480234 |
| 617.040795 | 6.695687883 | 10.18794174 | 1.289317209 |
| 617.490225 | 6.691357428 | 10.19660963 | 1.291057772 |
| 617.490225 | 6.686699895 | 10.20391324 | 1.294650505 |
| 618.373324 | 6.681815157 | 10.20992205 | 1.299965541 |
| 618.80481  | 6.676775191 | 10.21479514 | 1.306860484 |
| 619.231911 | 6.671615702 | 10.21875159 | 1.315225992 |
| 619.658523 | 6.66634639  | 10.22201925 | 1.325010938 |
| 620.089536 | 6.660955111 | 10.22483104 | 1.336228318 |
| 620.530144 | 6.655425049 | 10.22740304 | 1.348945143 |
| 620.984634 | 6.649750415 | 10.22994561 | 1.363236084 |
| 621.454318 | 6.643973642 | 10.2326586  | 1.379083346 |
| 621.935447 | 6.638197637 | 10.23570932 | 1.396274216 |
| 622.419693 | 6.632580335 | 10.23920542 | 1.414363904 |
| 622.898185 | 6.627263809 | 10.24318627 | 1.432841046 |
| 623.365699 | 6.622330625 | 10.24764956 | 1.451316163 |
| 623.365699 | 6.617795287 | 10.25258194 | 1.469598164 |
| 624.268136 | 6.613632332 | 10.25797217 | 1.487643209 |
| 624.70813  | 6.60981352  | 10.2638094  | 1.505453862 |
| 625.143479 | 6.606314588 | 10.27005806 | 1.523022106 |
| 625.574776 | 6.603122908 | 10.27665723 | 1.540293385 |
| 626.002048 | 6.600222411 | 10.28352256 | 1.557208183 |
| 626.425671 | 6.597591142 | 10.29055801 | 1.573725767 |
| 626.846513 | 6.595202041 | 10.29766608 | 1.589835739 |
| 627.265373 | 6.593022611 | 10.30473111 | 1.605530269 |
| 627.682462 | 6.591022667 | 10.31162029 | 1.620785787 |
| 628.097449 | 6.589170899 | 10.31818403 | 1.635564488 |
| 628.509977 | 6.587429401 | 10.32427809 | 1.64983884  |
| 628.920178 | 6.585762802 | 10.32978639 | 1.663603277 |
| 628.920178 | 6.58413188  | 10.33462797 | 1.676881205 |
| 629.737735 | 6.582492033 | 10.33876493 | 1.689724908 |
| 630.14899  | 6.580803946 | 10.34220422 | 1.702203899 |
| 630.565732 | 6.579025361 | 10.34499206 | 1.714405915 |
| 630.99172  | 6.577115679 | 10.34720792 | 1.726433683 |
| 631.430991 | 6.575034456 | 10.34897147 | 1.738386144 |
| 631.886595 | 6.572752597 | 10.35043581 | 1.75033157  |
| 632.358089 | 6.570262367 | 10.35180623 | 1.762243879 |
| 632.839121 | 6.567607257 | 10.35332931 | 1.773970966 |
| 633.318935 | 6.564873748 | 10.35526253 | 1.785285853 |
| 633.788444 | 6.562148575 | 10.35782597 | 1.79602874  |
| 634.244589 | 6.559488369 | 10.36119026 | 1.806194531 |
| 634.689678 | 6.556909243 | 10.36549849 | 1.815890411 |
| 634.689678 | 6.554407066 | 10.37089909 | 1.82526452  |
| 635.566819 | 6.551971427 | 10.3775463  | 1.834460957 |
| 636.008298 | 6.549597417 | 10.38558649 | 1.843586753 |
| 636.455022 | 6.547288631 | 10.39511772 | 1.852695907 |
| 636.90664  | 6.545058189 | 10.40613938 | 1.8617947   |
| 637.361426 | 6.542919242 | 10.41853914 | 1.87085315  |
| 637.817056 | 6.540881998 | 10.43209233 | 1.879835283 |
| 638.270605 | 6.538950419 | 10.44646611 | 1.888685953 |
| 638.718781 | 6.537125004 | 10.46124948 | 1.897347018 |
| 639.159039 | 6.535397333 | 10.47603093 | 1.905770931 |
| 639.590577 | 6.533751116 | 10.49047168 | 1.913944385 |
| 640.014367 | 6.532158933 | 10.50435075 | 1.921888533 |
| 640.432572 | 6.53059675  | 10.51754148 | 1.92964508  |
| 640.432572 | 6.529034325 | 10.53000876 | 1.937266934 |
| 641.264293 | 6.527444048 | 10.54177516 | 1.944818262 |
| 641.685414 | 6.525795261 | 10.55291566 | 1.952369503 |

|            |             |             |             |
|------------|-------------|-------------|-------------|
| 642.116382 | 6.524055497 | 10.5635425  | 1.960010797 |
| 642.562733 | 6.522192389 | 10.57378048 | 1.967832862 |
| 643.02911  | 6.52017881  | 10.58373033 | 1.975917786 |
| 643.51534  | 6.518017594 | 10.59339493 | 1.984260166 |
| 644.011796 | 6.515764002 | 10.60263488 | 1.992707077 |
| 644.502461 | 6.513519172 | 10.61126019 | 2.00100712  |
| 644.976261 | 6.511368728 | 10.61921504 | 2.008998073 |
| 645.431902 | 6.509348967 | 10.62661244 | 2.016686222 |
| 645.87404  | 6.507464028 | 10.63363415 | 2.024169949 |
| 646.308999 | 6.505706718 | 10.64046377 | 2.031578233 |
| 646.308999 | 6.504074457 | 10.6472577  | 2.039029041 |
| 647.179407 | 6.502568022 | 10.65414432 | 2.046620201 |
| 647.621815 | 6.501201079 | 10.66120819 | 2.054417129 |
| 648.070322 | 6.49998764  | 10.66849606 | 2.062449417 |
| 648.523723 | 6.498943679 | 10.6760058  | 2.070717554 |
| 648.979639 | 6.498082576 | 10.68369301 | 2.079196329 |
| 649.435109 | 6.49740775  | 10.69147208 | 2.087842861 |
| 649.887428 | 6.496911323 | 10.6992366  | 2.096613729 |
| 650.334928 | 6.496579634 | 10.70689312 | 2.105479746 |
| 650.777169 | 6.496394489 | 10.71437582 | 2.114430724 |
| 651.214682 | 6.496330796 | 10.72166716 | 2.123472546 |
| 651.64872  | 6.4963653   | 10.72880715 | 2.132631694 |
| 652.08125  | 6.496474019 | 10.73588579 | 2.141946018 |
| 652.08125  | 6.496632212 | 10.74304303 | 2.151477712 |
| 652.95375  | 6.496807694 | 10.75046024 | 2.161310455 |
| 653.401306 | 6.496966582 | 10.75833172 | 2.17154628  |
| 653.860953 | 6.497059446 | 10.76684582 | 2.182273022 |
| 654.332548 | 6.497019327 | 10.77610534 | 2.193506924 |
| 654.809963 | 6.496763031 | 10.78604889 | 2.20511439  |
| 655.282774 | 6.496207133 | 10.79643762 | 2.216839951 |
| 655.743044 | 6.495284065 | 10.80700629 | 2.228473708 |
| 656.189473 | 6.493936469 | 10.81759509 | 2.239957298 |
| 656.625818 | 6.492097991 | 10.82816795 | 2.251368082 |
| 657.057824 | 6.489687862 | 10.83874986 | 2.262841697 |
| 657.49113  | 6.486604685 | 10.84937294 | 2.274519924 |
| 657.929815 | 6.482743346 | 10.86003668 | 2.286512836 |
| 657.929815 | 6.478018298 | 10.87067638 | 2.298855083 |
| 658.82502  | 6.472410961 | 10.88116377 | 2.311492447 |
| 659.275398 | 6.465968402 | 10.89133276 | 2.324308308 |
| 659.722575 | 6.458803352 | 10.90106246 | 2.337196638 |
| 660.164539 | 6.451041155 | 10.91028743 | 2.3500894   |
| 660.60078  | 6.442808576 | 10.91898413 | 2.362966914 |
| 661.031651 | 6.434218955 | 10.92715425 | 2.375834609 |
| 661.457989 | 6.425373927 | 10.93480986 | 2.388712805 |
| 661.880997 | 6.416358991 | 10.94197596 | 2.401634544 |
| 662.302206 | 6.407242388 | 10.94869606 | 2.41464648  |
| 662.723447 | 6.398072293 | 10.95503433 | 2.427804679 |
| 663.146884 | 6.388884878 | 10.96108389 | 2.44118163  |
| 663.575169 | 6.379697724 | 10.96695916 | 2.454864549 |
| 663.575169 | 6.370515981 | 10.97280056 | 2.468964881 |
| 664.459832 | 6.361341226 | 10.97876219 | 2.483612534 |
| 664.922945 | 6.352193674 | 10.98498871 | 2.498917719 |
| 665.400488 | 6.343170603 | 10.99155998 | 2.514875824 |
| 665.884925 | 6.33449302  | 10.99843721 | 2.531237547 |
| 666.363388 | 6.326428003 | 11.00545055 | 2.547558234 |
| 666.826479 | 6.319123339 | 11.01243014 | 2.563492177 |
| 667.273344 | 6.312556367 | 11.01930884 | 2.578983236 |
| 667.709078 | 6.306609263 | 11.02610945 | 2.594184331 |
| 668.140792 | 6.301155995 | 11.03289189 | 2.609326859 |
| 668.575217 | 6.296097672 | 11.03971546 | 2.624633517 |
| 669.017034 | 6.291377969 | 11.04660195 | 2.640259988 |
| 669.467198 | 6.286986693 | 11.05351522 | 2.656228608 |
| 669.467198 | 6.282949876 | 11.06034656 | 2.672409049 |
| 670.376585 | 6.279296339 | 11.06696174 | 2.688584775 |
| 670.825212 | 6.27603178  | 11.0732452  | 2.704571487 |
| 671.265954 | 6.273137453 | 11.07913231 | 2.720277829 |
| 671.698618 | 6.270579141 | 11.08459255 | 2.735687005 |
| 672.124075 | 6.268326881 | 11.08960702 | 2.750820563 |
| 672.543741 | 6.266353337 | 11.09416646 | 2.765719121 |

|            |             |             |             |
|------------|-------------|-------------|-------------|
| 672.95939  | 6.264639658 | 11.09825887 | 2.780434612 |
| 673.37299  | 6.263176416 | 11.10188126 | 2.795027804 |
| 673.786515 | 6.261957475 | 11.10503563 | 2.809555307 |
| 674.201813 | 6.260990678 | 11.10774178 | 2.824067161 |
| 674.620599 | 6.260282622 | 11.11004976 | 2.838607153 |
| 675.044516 | 6.259852993 | 11.112042   | 2.85321217  |
| 675.044516 | 6.25972437  | 11.11384545 | 2.867912966 |
| 675.912889 | 6.259921593 | 11.11562594 | 2.882708942 |
| 676.35702  | 6.260469196 | 11.11757051 | 2.89753818  |
| 676.803705 | 6.261380137 | 11.11987112 | 2.912254708 |
| 677.24756  | 6.262646621 | 11.12269095 | 2.926666406 |
| 677.684543 | 6.264243213 | 11.12614668 | 2.940633445 |
| 678.114294 | 6.26614544  | 11.13032987 | 2.954142715 |
| 678.540165 | 6.26834442  | 11.13534198 | 2.967295869 |
| 678.967965 | 6.270852881 | 11.14131622 | 2.980266625 |
| 679.404601 | 6.273700158 | 11.14843184 | 2.993245319 |
| 679.856344 | 6.276916744 | 11.15690086 | 3.00638832  |
| 680.32577  | 6.280509391 | 11.16688329 | 3.019729427 |
| 680.808303 | 6.284404573 | 11.17835702 | 3.033098066 |
| 680.808303 | 6.288454128 | 11.19104599 | 3.046183824 |
| 681.772656 | 6.292489081 | 11.20458398 | 3.058742047 |
| 682.242408 | 6.296382056 | 11.21867146 | 3.070706074 |
| 682.70371  | 6.300033208 | 11.23311512 | 3.082115326 |
| 683.158683 | 6.303357082 | 11.24775006 | 3.093037953 |
| 683.609558 | 6.306260686 | 11.26241811 | 3.103539531 |
| 684.058686 | 6.308654536 | 11.27696351 | 3.113685222 |
| 684.508632 | 6.310447714 | 11.29123562 | 3.123535209 |
| 684.961985 | 6.311544326 | 11.30508677 | 3.133149107 |
| 685.420976 | 6.311854662 | 11.31837323 | 3.142570221 |
| 685.887094 | 6.311297954 | 11.33096133 | 3.15182463  |
| 686.360661 | 6.309819781 | 11.34274781 | 3.160916021 |
| 686.840021 | 6.307414071 | 11.35367397 | 3.169810309 |
| 686.840021 | 6.304150829 | 11.36371113 | 3.178425622 |
| 687.7933   | 6.300199223 | 11.37286667 | 3.186636034 |
| 688.251161 | 6.295782769 | 11.38120864 | 3.194341658 |
| 688.690697 | 6.291104435 | 11.38889207 | 3.201529085 |
| 689.1142   | 6.286286835 | 11.39612037 | 3.208274185 |
| 689.527211 | 6.281384962 | 11.40310891 | 3.214694683 |
| 689.936375 | 6.276405856 | 11.41005494 | 3.22091471  |
| 690.348175 | 6.271342728 | 11.41713541 | 3.227044027 |
| 690.767998 | 6.266195716 | 11.4245002  | 3.233173346 |
| 691.198993 | 6.260986303 | 11.43225902 | 3.239352728 |
| 691.64105  | 6.25578148  | 11.44045184 | 3.245585823 |
| 692.091139 | 6.250680317 | 11.44905028 | 3.251834922 |
| 692.545404 | 6.24578193  | 11.45798852 | 3.258058602 |
| 692.545404 | 6.241160717 | 11.46719193 | 3.264231239 |
| 693.456372 | 6.236869586 | 11.47658817 | 3.270341217 |
| 693.909604 | 6.232945336 | 11.48608165 | 3.276376049 |
| 694.3583   | 6.229420853 | 11.49554992 | 3.282315248 |
| 694.800272 | 6.226311756 | 11.50486429 | 3.288138686 |
| 695.234706 | 6.223609541 | 11.51391588 | 3.29384288  |
| 695.662553 | 6.221289362 | 11.52263543 | 3.299444238 |
| 696.086154 | 6.219320709 | 11.53097225 | 3.304974889 |
| 696.508691 | 6.217668607 | 11.53888747 | 3.310476225 |
| 696.933779 | 6.21630004  | 11.54634184 | 3.315991247 |
| 697.365121 | 6.215190683 | 11.55328109 | 3.32155994  |
| 697.80586  | 6.214317232 | 11.55964301 | 3.327212828 |
| 698.257153 | 6.213655028 | 11.56534467 | 3.332949149 |
| 698.257153 | 6.213181144 | 11.57030937 | 3.338714321 |
| 699.175095 | 6.212861293 | 11.57449634 | 3.344395972 |
| 699.625983 | 6.212656533 | 11.57795678 | 3.349880157 |
| 700.065088 | 6.212522301 | 11.58083462 | 3.355110603 |
| 700.494181 | 6.212424807 | 11.58331067 | 3.360105656 |
| 700.917915 | 6.212343944 | 11.58555683 | 3.364915487 |
| 701.341152 | 6.212265525 | 11.58772101 | 3.369584858 |
| 701.767161 | 6.212188546 | 11.58993189 | 3.374145041 |
| 702.196787 | 6.212123161 | 11.59229957 | 3.378593119 |
| 702.629046 | 6.212085278 | 11.59492003 | 3.382910455 |
| 703.063009 | 6.212100642 | 11.59788216 | 3.387082962 |

|            |             |             |             |
|------------|-------------|-------------|-------------|
| 703.499413 | 6.212203851 | 11.60127707 | 3.391111628 |
| 703.940779 | 6.212427345 | 11.60521227 | 3.395016134 |
| 703.940779 | 6.212814354 | 11.60980262 | 3.398816429 |
| 704.849608 | 6.213407706 | 11.61515958 | 3.402523726 |
| 705.317918 | 6.214245052 | 11.62135083 | 3.406122465 |
| 705.790444 | 6.215346525 | 11.62836274 | 3.409581127 |
| 706.260954 | 6.216705879 | 11.63609114 | 3.412865868 |
| 706.724822 | 6.218297827 | 11.6443937  | 3.415964655 |
| 707.180615 | 6.220085955 | 11.65312739 | 3.41889107  |
| 707.62963  | 6.222037144 | 11.66217598 | 3.421677795 |
| 708.074752 | 6.224113912 | 11.67143863 | 3.424363694 |
| 708.519482 | 6.226278435 | 11.68082885 | 3.426989786 |
| 708.967073 | 6.228479357 | 11.69024959 | 3.429591144 |
| 709.419528 | 6.230646077 | 11.69958867 | 3.432200522 |
| 709.876564 | 6.232678669 | 11.70871094 | 3.434835301 |
| 709.876564 | 6.234452577 | 11.71747561 | 3.437502074 |
| 710.792606 | 6.235832215 | 11.72578546 | 3.440203279 |
| 711.245935 | 6.236703565 | 11.73361616 | 3.442946513 |
| 711.696106 | 6.236960724 | 11.74101618 | 3.44575705  |
| 712.14517  | 6.236514476 | 11.74806346 | 3.44866425  |
| 712.594425 | 6.235277449 | 11.75481475 | 3.451696916 |
| 713.043179 | 6.233195571 | 11.76129638 | 3.454864405 |
| 713.489708 | 6.230252788 | 11.76751587 | 3.458169147 |
| 713.93347  | 6.226468822 | 11.77349874 | 3.461613531 |
| 714.376347 | 6.221869765 | 11.77930668 | 3.465217251 |
| 714.822256 | 6.216470595 | 11.78502046 | 3.469016926 |
| 715.275957 | 6.210276074 | 11.79073219 | 3.473061169 |
| 715.741475 | 6.20329521  | 11.79652678 | 3.477395384 |
| 715.741475 | 6.195597113 | 11.80245394 | 3.482038095 |
| 716.707177 | 6.187359856 | 11.80850225 | 3.48695195  |
| 717.194752 | 6.17886549  | 11.81459137 | 3.49204089  |
| 717.674162 | 6.170406635 | 11.82063457 | 3.497199447 |
| 718.141613 | 6.162175151 | 11.82658022 | 3.502361276 |
| 718.598229 | 6.154252989 | 11.83242479 | 3.507509814 |
| 719.048052 | 6.146643415 | 11.83818063 | 3.512670644 |
| 719.496338 | 6.139325528 | 11.84386856 | 3.517884992 |
| 719.948565 | 6.132276743 | 11.84949467 | 3.52320044  |
| 720.409559 | 6.125492001 | 11.85503733 | 3.528660091 |
| 720.882119 | 6.119007067 | 11.86044505 | 3.534283417 |
| 721.365226 | 6.112917452 | 11.86563093 | 3.540044709 |
| 721.853365 | 6.107352476 | 11.87049698 | 3.545862221 |
| 721.853365 | 6.10242993  | 11.874993   | 3.551627823 |
| 722.815232 | 6.09820596  | 11.87914149 | 3.557252931 |
| 723.279138 | 6.094667884 | 11.88301678 | 3.562690601 |
| 723.729318 | 6.091764015 | 11.88671254 | 3.567916563 |
| 724.166338 | 6.089425987 | 11.89031589 | 3.572933266 |
| 724.592535 | 6.087568697 | 11.89390601 | 3.577763754 |
| 725.011745 | 6.086116262 | 11.89755292 | 3.582446963 |
| 725.4287   | 6.084995438 | 11.90132543 | 3.587030954 |
| 725.848412 | 6.084142338 | 11.90528903 | 3.591560741 |
| 726.275662 | 6.083498095 | 11.90950763 | 3.596080136 |
| 726.714317 | 6.08300632  | 11.91403373 | 3.600613215 |
| 727.166164 | 6.082606263 | 11.91890163 | 3.605161037 |
| 727.629324 | 6.082235459 | 11.92410071 | 3.609686596 |
| 727.629324 | 6.081839449 | 11.92956064 | 3.614112028 |
| 728.562435 | 6.081379848 | 11.93516748 | 3.618350626 |
| 729.017217 | 6.08084264  | 11.94081064 | 3.622340147 |
| 729.459257 | 6.080240849 | 11.94642425 | 3.626064602 |
| 729.889416 | 6.079599244 | 11.95198092 | 3.629538849 |
| 730.310555 | 6.078949221 | 11.95747913 | 3.632793577 |
| 730.726379 | 6.078325374 | 11.96292699 | 3.635859249 |
| 731.140851 | 6.07776775  | 11.96833744 | 3.638762373 |
| 731.557957 | 6.077319247 | 11.9737128  | 3.641526465 |
| 731.981553 | 6.077024924 | 11.97905111 | 3.64416042  |
| 732.415014 | 6.076934119 | 11.98433641 | 3.646669578 |
| 732.86038  | 6.077103131 | 11.98953487 | 3.649038421 |
| 733.317018 | 6.077578578 | 11.9945893  | 3.651236905 |
| 733.317018 | 6.07839473  | 11.99941846 | 3.653216946 |
| 734.244269 | 6.079546642 | 12.0039509  | 3.654931688 |

|            |             |             |             |
|------------|-------------|-------------|-------------|
| 734.700444 | 6.080995733 | 12.00813919 | 3.656350494 |
| 735.144381 | 6.082683847 | 12.01198213 | 3.657466723 |
| 735.575063 | 6.084548858 | 12.01551399 | 3.658297147 |
| 735.994603 | 6.08654227  | 12.01878596 | 3.658863779 |
| 736.406781 | 6.088628451 | 12.02185147 | 3.65918616  |
| 736.815878 | 6.090772457 | 12.02475648 | 3.659281234 |
| 737.226073 | 6.092943529 | 12.02753479 | 3.659154566 |
| 737.641146 | 6.095101671 | 12.03021343 | 3.658807754 |
| 738.064155 | 6.097194378 | 12.03280275 | 3.658237893 |
| 738.496766 | 6.099146681 | 12.03530472 | 3.657441804 |
| 738.93829  | 6.100867895 | 12.0377001  | 3.656429467 |
| 738.93829  | 6.102250204 | 12.03996013 | 3.655221618 |
| 739.832283 | 6.10319146  | 12.04205046 | 3.653859659 |
| 740.275168 | 6.103625758 | 12.04394965 | 3.652392    |
| 740.711972 | 6.103516395 | 12.04565208 | 3.650866613 |
| 741.143142 | 6.102850903 | 12.04716177 | 3.649325223 |
| 741.57044  | 6.101629622 | 12.04848548 | 3.647801973 |
| 741.99621  | 6.099860422 | 12.0496251  | 3.646331011 |
| 742.423217 | 6.097551548 | 12.05058301 | 3.644948448 |
| 742.854831 | 6.094711975 | 12.05134978 | 3.64368859  |
| 743.295079 | 6.091346978 | 12.05191282 | 3.642594842 |
| 743.74797  | 6.087465289 | 12.05224659 | 3.641722844 |
| 744.215416 | 6.083106724 | 12.05232137 | 3.641142728 |
| 744.693965 | 6.078379837 | 12.05210387 | 3.640939475 |
| 744.693965 | 6.073484975 | 12.05158653 | 3.641181302 |
| 745.643556 | 6.068651849 | 12.05079629 | 3.641893043 |
| 746.097242 | 6.064046161 | 12.0497757  | 3.643055724 |
| 746.535112 | 6.059739818 | 12.0485643  | 3.644643264 |
| 746.961219 | 6.055752986 | 12.04718559 | 3.64664034  |
| 747.380865 | 6.052081131 | 12.04564723 | 3.649052136 |
| 747.799397 | 6.048720572 | 12.04395169 | 3.651897734 |
| 748.221808 | 6.045676854 | 12.04209383 | 3.655211484 |
| 748.652579 | 6.042967364 | 12.04006643 | 3.659039597 |
| 749.09523  | 6.040624794 | 12.0378727  | 3.663429586 |
| 749.551185 | 6.038694989 | 12.03552903 | 3.668412816 |
| 750.018096 | 6.037226573 | 12.03308234 | 3.673970697 |
| 750.489454 | 6.036248568 | 12.03062032 | 3.680010897 |
| 750.489454 | 6.035743408 | 12.02824452 | 3.68639365  |
| 751.416842 | 6.035646757 | 12.02604077 | 3.692987673 |
| 751.866409 | 6.035866138 | 12.02407513 | 3.699709661 |
| 752.307491 | 6.036304449 | 12.02239436 | 3.706520295 |
| 752.742651 | 6.036865186 | 12.02103942 | 3.713401161 |
| 753.17511  | 6.037450615 | 12.02005113 | 3.720357319 |
| 753.608885 | 6.037962354 | 12.01947537 | 3.727406171 |
| 754.049225 | 6.03829729  | 12.01937723 | 3.734590359 |
| 754.502941 | 6.038330891 | 12.01984752 | 3.741976812 |
| 754.9779   | 6.037914264 | 12.02102396 | 3.749645514 |
| 755.479723 | 6.036863936 | 12.0230956  | 3.757622139 |
| 756.003499 | 6.03501658  | 12.02622464 | 3.765764958 |
| 756.528648 | 6.032364476 | 12.03038694 | 3.77369791  |
| 756.528648 | 6.02909181  | 12.03534565 | 3.781070408 |
| 757.509705 | 6.02541711  | 12.04085231 | 3.787795785 |
| 757.962704 | 6.021489257 | 12.04676815 | 3.793967537 |
| 758.399851 | 6.017396183 | 12.05303602 | 3.799720737 |
| 758.828518 | 6.013193808 | 12.05964715 | 3.805176443 |
| 759.254828 | 6.008924195 | 12.06660573 | 3.810424913 |
| 759.683698 | 6.004636664 | 12.07392271 | 3.815540791 |
| 760.11889  | 6.000379641 | 12.08160375 | 3.820577395 |
| 760.562747 | 5.996218043 | 12.08963404 | 3.825572485 |
| 761.015536 | 5.992236154 | 12.09796061 | 3.830537047 |
| 761.47478  | 5.988528628 | 12.10647754 | 3.835461069 |
| 761.935489 | 5.98519099  | 12.11502936 | 3.840308271 |
| 762.391769 | 5.982293619 | 12.12344993 | 3.845043442 |
| 762.391769 | 5.979862762 | 12.13160865 | 3.849637716 |
| 763.274544 | 5.977883179 | 12.13943373 | 3.854093573 |
| 763.698833 | 5.976315218 | 12.14691398 | 3.858431395 |
| 764.113732 | 5.975108016 | 12.15408351 | 3.862689556 |
| 764.522438 | 5.974209859 | 12.16100406 | 3.866913288 |
| 764.928954 | 5.973572067 | 12.16775698 | 3.871159768 |

|            |             |             |             |
|------------|-------------|-------------|-------------|
| 765.337886 | 5.973149608 | 12.17443747 | 3.875490372 |
| 765.754247 | 5.972900472 | 12.18115372 | 3.879974881 |
| 766.182881 | 5.972778896 | 12.18801889 | 3.884686912 |
| 766.626955 | 5.972734633 | 12.19513612 | 3.889685321 |
| 767.085443 | 5.972696636 | 12.20255051 | 3.894987553 |
| 767.551628 | 5.972584363 | 12.21022545 | 3.900544342 |
| 768.015876 | 5.972314141 | 12.2180602  | 3.906258974 |
| 768.015876 | 5.9718219   | 12.22596203 | 3.912052921 |
| 768.914996 | 5.971066974 | 12.23389455 | 3.917900155 |
| 769.349342 | 5.970025326 | 12.24186719 | 3.923818341 |
| 769.777242 | 5.968685024 | 12.24991332 | 3.929848509 |
| 770.202259 | 5.967041169 | 12.25807411 | 3.936040226 |
| 770.627824 | 5.965102222 | 12.26639337 | 3.942446284 |
| 771.057137 | 5.962888714 | 12.27491168 | 3.949117288 |
| 771.493159 | 5.960434767 | 12.28366927 | 3.956104723 |
| 771.938441 | 5.957798887 | 12.29269547 | 3.963456044 |
| 772.394551 | 5.955064935 | 12.30200169 | 3.971202593 |
| 772.861083 | 5.952356133 | 12.31154844 | 3.979338393 |
| 773.334833 | 5.949827788 | 12.32123326 | 3.987802168 |
| 773.81034  | 5.947651639 | 12.3308987  | 3.996485943 |
| 773.81034  | 5.945973772 | 12.34038779 | 4.005264222 |
| 774.746733 | 5.944893914 | 12.34958691 | 4.014045675 |
| 775.20392  | 5.944472475 | 12.3584564  | 4.022796882 |
| 775.655723 | 5.944744928 | 12.36700272 | 4.031526795 |
| 776.105746 | 5.945738189 | 12.37527032 | 4.040282444 |
| 776.55835  | 5.947492842 | 12.38332332 | 4.049121154 |
| 777.017735 | 5.950055114 | 12.39122091 | 4.058097743 |
| 777.486345 | 5.953468387 | 12.39900762 | 4.067235752 |
| 777.962492 | 5.957730834 | 12.40667361 | 4.07646522  |
| 778.439204 | 5.962743403 | 12.41415283 | 4.085623783 |
| 778.907386 | 5.968320002 | 12.42136591 | 4.094509639 |
| 779.361121 | 5.974253214 | 12.42828678 | 4.102996084 |
| 779.799528 | 5.980385356 | 12.43495403 | 4.111059504 |
| 779.799528 | 5.986616198 | 12.44143683 | 4.11874563  |
| 780.641844 | 5.992879646 | 12.44781164 | 4.126124132 |
| 781.053848 | 5.999131517 | 12.45414342 | 4.133267135 |
| 781.464865 | 6.005323538 | 12.46049343 | 4.140236271 |
| 781.878017 | 6.0114051   | 12.46690523 | 4.147075958 |
| 782.295613 | 6.017312487 | 12.47341091 | 4.15381485  |
| 782.718994 | 6.022967991 | 12.48003055 | 4.160462499 |
| 783.14848  | 6.028289179 | 12.48676932 | 4.167009164 |
| 783.583472 | 6.033196501 | 12.49361889 | 4.173427569 |
| 784.022756 | 6.037629777 | 12.50056473 | 4.179685297 |
| 784.46487  | 6.041553361 | 12.50758359 | 4.185746203 |
| 784.908383 | 6.044967284 | 12.5146582  | 4.191577614 |
| 785.352039 | 6.04789859  | 12.52176656 | 4.197149803 |
| 785.352039 | 6.050399418 | 12.528893   | 4.202447274 |
| 786.236725 | 6.052538702 | 12.53602914 | 4.207456759 |
| 786.678114 | 6.054398223 | 12.54318128 | 4.212183237 |
| 787.120985 | 6.056058021 | 12.55037205 | 4.216643669 |
| 787.568376 | 6.057602372 | 12.55764656 | 4.220861736 |
| 788.024087 | 6.059112053 | 12.56505685 | 4.224866111 |
| 788.491659 | 6.060663546 | 12.57265398 | 4.228677052 |
| 788.972254 | 6.062331004 | 12.58044803 | 4.232292097 |
| 789.462093 | 6.064164656 | 12.58837211 | 4.23568319  |
| 789.952988 | 6.066194575 | 12.59628641 | 4.238810195 |
| 790.437375 | 6.068426664 | 12.60406441 | 4.241660412 |
| 790.911984 | 6.070868312 | 12.61165576 | 4.244255676 |
| 791.376933 | 6.07352316  | 12.61906256 | 4.246637914 |
| 791.376933 | 6.076395901 | 12.6263122  | 4.248851162 |
| 792.28352  | 6.079483906 | 12.63343558 | 4.25093623  |
| 792.728325 | 6.082776558 | 12.64046697 | 4.252925104 |
| 793.169301 | 6.086255966 | 12.64743889 | 4.254845644 |
| 793.607295 | 6.089890746 | 12.65438157 | 4.256721779 |
| 794.042489 | 6.09363412  | 12.66131604 | 4.258567918 |
| 794.474555 | 6.097424278 | 12.66825935 | 4.260394912 |
| 794.903123 | 6.101188015 | 12.6752223  | 4.262211181 |
| 795.328252 | 6.104850422 | 12.68223    | 4.264020185 |
| 795.750601 | 6.108332764 | 12.68931142 | 4.26583217  |

|            |             |             |             |
|------------|-------------|-------------|-------------|
| 796.171266 | 6.111558096 | 12.69650278 | 4.267652475 |
| 796.591474 | 6.114449098 | 12.70384159 | 4.269490531 |
| 797.01234  | 6.116924568 | 12.71135645 | 4.271348577 |
| 797.01234  | 6.118913308 | 12.71907174 | 4.273231605 |
| 797.859568 | 6.120347971 | 12.72699684 | 4.275141514 |
| 798.287496 | 6.121180031 | 12.73513775 | 4.277080238 |
| 798.71957  | 6.121383642 | 12.74348915 | 4.27904864  |
| 799.156803 | 6.12095439  | 12.75203297 | 4.281047039 |
| 799.599457 | 6.119921165 | 12.76072386 | 4.283070737 |
| 800.045767 | 6.118350514 | 12.76946451 | 4.285103842 |
| 800.491513 | 6.116361448 | 12.77810077 | 4.287116922 |
| 800.931987 | 6.114103456 | 12.78646746 | 4.289078394 |
| 801.364953 | 6.111727761 | 12.79446047 | 4.290967294 |
| 801.791557 | 6.109353299 | 12.8020483  | 4.292778601 |
| 802.215084 | 6.107073654 | 12.80924497 | 4.294517368 |
| 802.63936  | 6.104968624 | 12.81606531 | 4.296190031 |
| 802.63936  | 6.103112567 | 12.82250984 | 4.297794387 |
| 803.502097 | 6.101587313 | 12.82855367 | 4.299328397 |
| 803.943339 | 6.100470823 | 12.83414663 | 4.300780665 |
| 804.390262 | 6.099836857 | 12.83922226 | 4.302133686 |
| 804.84024  | 6.099739033 | 12.84371495 | 4.303371224 |
| 805.289971 | 6.100206086 | 12.84758086 | 4.304474635 |
| 805.736792 | 6.101231002 | 12.8508216  | 4.3054334   |
| 806.179649 | 6.10278807  | 12.85347055 | 4.306247913 |
| 806.619187 | 6.104841209 | 12.85559376 | 4.306918576 |
| 807.057228 | 6.107351329 | 12.8572692  | 4.307451252 |
| 807.496119 | 6.110282021 | 12.85857959 | 4.307852411 |
| 807.938198 | 6.113590668 | 12.85960863 | 4.308123827 |
| 808.385389 | 6.11722785  | 12.8604422  | 4.308272042 |
| 808.385389 | 6.121127549 | 12.86117036 | 4.308299769 |
| 809.299729 | 6.125210891 | 12.8618901  | 4.308216628 |
| 809.76811  | 6.129383626 | 12.86270032 | 4.308031236 |
| 810.244844 | 6.133551755 | 12.86370697 | 4.307756256 |
| 810.730017 | 6.137610696 | 12.86501426 | 4.307410932 |
| 811.221004 | 6.141446475 | 12.86671639 | 4.307018346 |
| 811.710965 | 6.144939143 | 12.86887028 | 4.30661297  |
| 812.191725 | 6.148011641 | 12.87148408 | 4.306227061 |
| 812.659187 | 6.150656748 | 12.87454295 | 4.30589249  |
| 813.114824 | 6.152930202 | 12.87803956 | 4.305630549 |
| 813.563271 | 6.1549112   | 12.8819885  | 4.305457639 |
| 814.009729 | 6.156684461 | 12.88641864 | 4.305395311 |
| 814.4585   | 6.158327126 | 12.8913607  | 4.305463889 |
| 814.4585   | 6.159918638 | 12.89682703 | 4.305691103 |
| 815.371628 | 6.16153365  | 12.9028045  | 4.306106467 |
| 815.835142 | 6.163245184 | 12.90923415 | 4.306736614 |
| 816.299614 | 6.165122415 | 12.91601593 | 4.307600319 |
| 816.76153  | 6.167217808 | 12.92302427 | 4.308708522 |
| 817.218861 | 6.169577413 | 12.93014966 | 4.310064708 |
| 817.672018 | 6.172244228 | 12.93731697 | 4.311673259 |
| 818.123328 | 6.175264044 | 12.94448628 | 4.313544572 |
| 818.57576  | 6.178681036 | 12.95163835 | 4.315692849 |
| 819.031704 | 6.182533782 | 12.95874889 | 4.318132124 |
| 819.492214 | 6.186842242 | 12.96578566 | 4.320868762 |
| 819.956966 | 6.191599249 | 12.97270226 | 4.323897003 |
| 820.425011 | 6.196772889 | 12.97946571 | 4.327200822 |
| 820.425011 | 6.202309548 | 12.98607338 | 4.33075877  |
| 821.369506 | 6.208140193 | 12.99255344 | 4.334552745 |
| 821.846039 | 6.214166862 | 12.99895565 | 4.338553687 |
| 822.323367 | 6.220233427 | 13.00532674 | 4.342716794 |
| 822.796351 | 6.226125052 | 13.01168254 | 4.346958677 |
| 823.259145 | 6.23161283  | 13.01803525 | 4.351186956 |
| 823.70911  | 6.236521033 | 13.02442835 | 4.355335859 |
| 824.147814 | 6.240752722 | 13.03094301 | 4.359385589 |
| 824.579174 | 6.24424522  | 13.03768807 | 4.363341432 |
| 825.007337 | 6.246946566 | 13.04476914 | 4.367214157 |
| 825.435396 | 6.248803292 | 13.05227018 | 4.371005991 |
| 825.864819 | 6.249772356 | 13.06023801 | 4.374700913 |
| 826.295521 | 6.249841181 | 13.06867359 | 4.37827573  |
| 826.295521 | 6.249044582 | 13.07753703 | 4.381694683 |

|            |             |             |             |
|------------|-------------|-------------|-------------|
| 827.156952 | 6.247464433 | 13.08676204 | 4.384926782 |
| 827.586277 | 6.245226091 | 13.09627536 | 4.387950175 |
| 828.014453 | 6.242473101 | 13.10599402 | 4.390741989 |
| 828.441483 | 6.239369696 | 13.1158318  | 4.393284772 |
| 828.867471 | 6.236078971 | 13.12569531 | 4.395560797 |
| 829.292904 | 6.232759796 | 13.1355051  | 4.397553868 |
| 829.718718 | 6.229557713 | 13.14519074 | 4.399253565 |
| 830.146005 | 6.226609099 | 13.15469426 | 4.400644368 |
| 830.575646 | 6.224036356 | 13.16395531 | 4.401710752 |
| 831.00821  | 6.221952871 | 13.17292057 | 4.402434392 |
| 831.444152 | 6.220460983 | 13.18154301 | 4.402797359 |
| 831.884093 | 6.219647177 | 13.18979176 | 4.402779882 |
| 831.884093 | 6.219583136 | 13.19766092 | 4.402362699 |
| 832.77962  | 6.22033274  | 13.20515542 | 4.401527128 |
| 833.236439 | 6.221940117 | 13.21229099 | 4.4002549   |
| 833.697959 | 6.224423191 | 13.21907369 | 4.398534989 |
| 834.160399 | 6.227748091 | 13.22550109 | 4.396385327 |
| 834.618977 | 6.231825459 | 13.23158018 | 4.393844877 |
| 835.070571 | 6.236533736 | 13.23735116 | 4.390966827 |
| 835.515062 | 6.241764475 | 13.24289281 | 4.38779447  |
| 835.954606 | 6.247431748 | 13.24829861 | 4.384359686 |
| 836.392248 | 6.253468907 | 13.25366638 | 4.380684916 |
| 836.830947 | 6.259814182 | 13.25908364 | 4.376788728 |
| 837.273165 | 6.26639623  | 13.26462785 | 4.372695268 |
| 837.720935 | 6.273136464 | 13.2703667  | 4.36843351  |
| 837.720935 | 6.279947731 | 13.27637113 | 4.364038631 |
| 838.641393 | 6.28673798  | 13.28271413 | 4.359546793 |
| 839.118459 | 6.293408747 | 13.28946435 | 4.355003416 |
| 839.607909 | 6.299826109 | 13.2966677  | 4.350476274 |
| 840.106425 | 6.305824998 | 13.30430404 | 4.346075139 |
| 840.607243 | 6.311232202 | 13.31227526 | 4.341932647 |
| 841.103562 | 6.315941844 | 13.32044644 | 4.33816241  |
| 841.591485 | 6.319937749 | 13.3287039  | 4.334831572 |
| 842.070244 | 6.323271196 | 13.33696837 | 4.331965689 |
| 842.541008 | 6.326025083 | 13.34518313 | 4.329567088 |
| 843.005831 | 6.328297336 | 13.3533038  | 4.327629479 |
| 843.467054 | 6.330183313 | 13.3612829  | 4.326142223 |
| 843.926832 | 6.33177567  | 13.36906611 | 4.325101758 |
| 843.926832 | 6.333157246 | 13.37657517 | 4.324500561 |
| 844.844834 | 6.334401959 | 13.38370189 | 4.324334061 |
| 845.299062 | 6.335571888 | 13.39030494 | 4.324582713 |
| 845.745116 | 6.336718407 | 13.39626018 | 4.32521019  |
| 846.180741 | 6.3378799   | 13.40149744 | 4.326164653 |
| 846.606261 | 6.33908725  | 13.40600895 | 4.327398836 |
| 847.023723 | 6.340363104 | 13.40981783 | 4.328869544 |
| 847.435704 | 6.341718456 | 13.41295745 | 4.330540272 |
| 847.844586 | 6.343161159 | 13.41547068 | 4.332384285 |
| 848.252337 | 6.344684925 | 13.41739605 | 4.334372255 |
| 848.660627 | 6.346275276 | 13.41878223 | 4.336477871 |
| 849.071095 | 6.347910626 | 13.41969182 | 4.338672658 |
| 849.485641 | 6.349557363 | 13.4201936  | 4.34093565  |
| 849.485641 | 6.351174789 | 13.42037139 | 4.343240266 |
| 850.336163 | 6.352704767 | 13.42032266 | 4.345561874 |
| 850.775987 | 6.354075782 | 13.4201621  | 4.347868392 |
| 851.225393 | 6.355195182 | 13.42002117 | 4.350109834 |
| 851.681076 | 6.355967693 | 13.42004651 | 4.352226189 |
| 852.138568 | 6.356319039 | 13.42037492 | 4.354157087 |
| 852.594719 | 6.356215651 | 13.42111535 | 4.355855539 |
| 853.048789 | 6.355666085 | 13.42234335 | 4.357293426 |
| 853.50191  | 6.354713923 | 13.42410886 | 4.358454787 |
| 853.956187 | 6.35343491  | 13.42643461 | 4.359325333 |
| 854.414211 | 6.351931848 | 13.4293301  | 4.35989001  |
| 854.878848 | 6.350339923 | 13.43278709 | 4.360128405 |
| 855.352664 | 6.348824123 | 13.43678225 | 4.360019671 |
| 855.352664 | 6.347581004 | 13.44125628 | 4.359535316 |
| 856.325651 | 6.346827206 | 13.44608604 | 4.358661415 |
| 856.812438 | 6.346756867 | 13.45107809 | 4.357415829 |
| 857.288617 | 6.347477308 | 13.45603849 | 4.35584159  |
| 857.751441 | 6.349025896 | 13.46083306 | 4.353986675 |



|            |             |             |             |
|------------|-------------|-------------|-------------|
| 858.202851 | 6.351401282 | 13.46539675 | 4.351885776 |
| 858.64663  | 6.354604064 | 13.46968748 | 4.349558622 |
| 859.086461 | 6.358638323 | 13.47366937 | 4.347018954 |
| 859.525227 | 6.363506796 | 13.47729857 | 4.344280884 |
| 859.964962 | 6.369212266 | 13.48051834 | 4.341360554 |
| 860.407004 | 6.375743152 | 13.48327121 | 4.338279123 |
| 860.852104 | 6.383082904 | 13.48549842 | 4.335062151 |
| 861.3004   | 6.391194908 | 13.48715418 | 4.331740378 |
| 861.3004   | 6.400022806 | 13.48820431 | 4.328348466 |
| 862.204152 | 6.409488728 | 13.48864688 | 4.324927023 |
| 862.657296 | 6.419492082 | 13.48850165 | 4.32151168  |
| 863.109346 | 6.42991937  | 13.48782301 | 4.318142051 |
| 863.558633 | 6.44063698  | 13.48669237 | 4.314850179 |
| 864.003634 | 6.451510934 | 13.48521067 | 4.311662476 |
| 864.443668 | 6.462418883 | 13.48349035 | 4.30859868  |
| 864.879493 | 6.4732751   | 13.48164623 | 4.305659216 |
| 865.313337 | 6.484026303 | 13.47978886 | 4.302838739 |
| 865.748443 | 6.494643273 | 13.47802566 | 4.300126969 |
| 866.188302 | 6.505086047 | 13.4764769  | 4.297507977 |
| 866.63553  | 6.51527948  | 13.47528099 | 4.294982098 |
| 867.090263 | 6.525069344 | 13.47460222 | 4.292562449 |
| 867.090263 | 6.534224035 | 13.4746096  | 4.290282886 |
| 868.005809 | 6.542501037 | 13.47544392 | 4.288180977 |
| 868.455992 | 6.549736065 | 13.47718675 | 4.286281704 |
| 868.898393 | 6.555879229 | 13.47987574 | 4.284593968 |
| 869.334786 | 6.56095314  | 13.48353271 | 4.283109192 |
| 869.768137 | 6.565005505 | 13.48817436 | 4.281824761 |
| 870.201396 | 6.568084533 | 13.49380943 | 4.280742616 |
| 870.637041 | 6.570233089 | 13.50042592 | 4.279869005 |
| 871.077071 | 6.571500093 | 13.50798816 | 4.279222316 |
| 871.523068 | 6.571937086 | 13.51642193 | 4.278823579 |
| 871.975931 | 6.571610667 | 13.52561141 | 4.278698729 |
| 872.435183 | 6.570604453 | 13.53537161 | 4.278879315 |
| 872.898408 | 6.569025615 | 13.54544705 | 4.279386659 |
| 872.898408 | 6.567011113 | 13.5555324  | 4.280237234 |
| 873.82209  | 6.564704094 | 13.56534722 | 4.281426763 |
| 874.277399 | 6.562235915 | 13.57468186 | 4.282950004 |
| 874.72751  | 6.559722582 | 13.58341335 | 4.284794198 |
| 875.172902 | 6.557255468 | 13.59148301 | 4.286946192 |
| 875.614261 | 6.554910983 | 13.59888758 | 4.289391389 |
| 876.052455 | 6.55274763  | 13.60566908 | 4.292115341 |
| 876.488629 | 6.550808795 | 13.61191037 | 4.29510821  |
| 876.924119 | 6.549125419 | 13.61772298 | 4.29835625  |
| 877.360107 | 6.547713372 | 13.62324023 | 4.301849417 |
| 877.79708  | 6.546579521 | 13.62859664 | 4.305568317 |
| 878.234298 | 6.545714832 | 13.63392594 | 4.309485987 |
| 878.669707 | 6.545097979 | 13.63934622 | 4.313555983 |
| 878.669707 | 6.544692326 | 13.64495932 | 4.317722432 |
| 879.526336 | 6.544450412 | 13.65086038 | 4.32194146  |
| 879.946868 | 6.54432277  | 13.65714831 | 4.326186512 |
| 880.364838 | 6.544264428 | 13.66393176 | 4.330451317 |
| 880.783481 | 6.544244738 | 13.6713175  | 4.334736912 |
| 881.206005 | 6.544240818 | 13.67940895 | 4.339046115 |
| 881.634989 | 6.544240598 | 13.68828313 | 4.343371788 |
| 882.072007 | 6.544250812 | 13.69798231 | 4.347690369 |
| 882.517403 | 6.544290218 | 13.70848865 | 4.351961732 |
| 882.970212 | 6.544396468 | 13.71971757 | 4.356130503 |
| 883.42826  | 6.544621199 | 13.73151376 | 4.360125988 |
| 883.8886   | 6.545024289 | 13.7436708  | 4.363875031 |
| 884.348341 | 6.545668908 | 13.75596488 | 4.367309826 |
| 884.348341 | 6.54661243  | 13.76819748 | 4.37038057  |
| 885.259444 | 6.547907669 | 13.78021664 | 4.373052163 |
| 885.71091  | 6.549602953 | 13.79192097 | 4.375304483 |
| 886.161537 | 6.551746963 | 13.8032502  | 4.377122681 |
| 886.613675 | 6.554392987 | 13.81416438 | 4.378492545 |
| 887.070137 | 6.55760122  | 13.8246396  | 4.379398765 |
| 887.53383  | 6.56144043  | 13.83464903 | 4.379820954 |
| 888.007048 | 6.565983168 | 13.84414812 | 4.379735519 |
| 888.490414 | 6.571289634 | 13.85305996 | 4.379121838 |

|            |             |             |             |
|------------|-------------|-------------|-------------|
| 888.981801 | 6.577379002 | 13.86127744 | 4.37797545  |
| 889.475866 | 6.584206674 | 13.86868237 | 4.376328831 |
| 889.965399 | 6.591653142 | 13.8751982  | 4.374248068 |
| 890.444742 | 6.599580337 | 13.88083824 | 4.371829022 |
| 890.444742 | 6.607888581 | 13.88571064 | 4.369152929 |
| 891.371118 | 6.616540826 | 13.88996752 | 4.366276103 |
| 891.824938 | 6.625539304 | 13.89378071 | 4.363229717 |
| 892.27834  | 6.634900161 | 13.89731232 | 4.360035518 |
| 892.734848 | 6.644619313 | 13.9007172  | 4.356715411 |
| 893.196611 | 6.654650907 | 13.90415153 | 4.35329922  |
| 893.66414  | 6.664900993 | 13.90776694 | 4.349828334 |
| 894.136311 | 6.675215626 | 13.91171187 | 4.346359072 |
| 894.610894 | 6.685408644 | 13.91612054 | 4.342954161 |
| 895.085512 | 6.6952854   | 13.92110549 | 4.339675644 |
| 895.558409 | 6.704681899 | 13.92674981 | 4.33657248  |
| 896.028553 | 6.713477619 | 13.93310941 | 4.333684724 |
| 896.495257 | 6.721597006 | 13.94019836 | 4.331045227 |
| 896.495257 | 6.72900773  | 13.94798425 | 4.328677396 |
| 897.415959 | 6.735725084 | 13.95639134 | 4.326599352 |
| 897.869362 | 6.741807211 | 13.96531085 | 4.324822571 |
| 898.318286 | 6.74735141  | 13.97460537 | 4.323352505 |
| 898.762817 | 6.752469379 | 13.98411364 | 4.322192305 |
| 899.20277  | 6.75727803  | 13.99365286 | 4.321342264 |
| 899.637981 | 6.761901659 | 14.00303962 | 4.320797348 |
| 900.068637 | 6.766454788 | 14.01210808 | 4.320549821 |
| 900.49523  | 6.771042838 | 14.02071183 | 4.320592135 |
| 900.918295 | 6.775758841 | 14.02872864 | 4.320911792 |
| 901.338358 | 6.780679891 | 14.03606559 | 4.321495846 |
| 901.756223 | 6.785867754 | 14.04266205 | 4.322335368 |
| 902.173324 | 6.79138236  | 14.04849617 | 4.323422769 |
| 902.173324 | 6.797278782 | 14.05358435 | 4.324749647 |
| 903.014284 | 6.803618973 | 14.05796709 | 4.326319543 |
| 903.443454 | 6.810454614 | 14.06170606 | 4.328137397 |
| 903.881496 | 6.817827522 | 14.06488432 | 4.330208466 |
| 904.329492 | 6.825752956 | 14.06760818 | 4.332532219 |
| 904.787064 | 6.834200569 | 14.07001223 | 4.335102314 |
| 905.252584 | 6.843095582 | 14.07224898 | 4.337891635 |
| 905.72398  | 6.852336199 | 14.07449324 | 4.340869351 |
| 906.199625 | 6.86180557  | 14.07691831 | 4.343995742 |
| 906.67871  | 6.871396751 | 14.07968753 | 4.34723585  |
| 907.161001 | 6.881006757 | 14.08294501 | 4.350549895 |
| 907.646265 | 6.890535898 | 14.08681383 | 4.353897201 |
| 908.133805 | 6.899883547 | 14.09138917 | 4.35723587  |
| 908.133805 | 6.908955252 | 14.09672252 | 4.360518704 |
| 909.110322 | 6.91766745  | 14.10282771 | 4.363704514 |
| 909.5952   | 6.925955526 | 14.10966309 | 4.366752151 |
| 910.073988 | 6.933774901 | 14.11713413 | 4.369633311 |
| 910.54398  | 6.941112106 | 14.12510491 | 4.372329615 |
| 911.003755 | 6.948000301 | 14.13343868 | 4.374842306 |
| 911.453134 | 6.954498174 | 14.14200674 | 4.377187079 |
| 911.892595 | 6.960680007 | 14.15069485 | 4.379388046 |
| 912.323042 | 6.966620715 | 14.1594085  | 4.381470635 |
| 912.74596  | 6.972403214 | 14.16807148 | 4.383463158 |
| 913.163488 | 6.978113167 | 14.17663248 | 4.385397434 |
| 913.578197 | 6.983839372 | 14.18506171 | 4.387304507 |
| 913.992691 | 6.989665191 | 14.19333307 | 4.389209827 |
| 913.992691 | 6.99567408  | 14.20141659 | 4.391143382 |
| 914.8291   | 7.001936802 | 14.20926735 | 4.393122611 |
| 915.252835 | 7.008506817 | 14.21682454 | 4.395166046 |
| 915.679691 | 7.015424277 | 14.22401258 | 4.397282325 |
| 916.108233 | 7.022706038 | 14.23075367 | 4.399476335 |
| 916.536825 | 7.030356663 | 14.23698047 | 4.401747719 |
| 916.96407  | 7.038372422 | 14.24264564 | 4.404096013 |
| 917.389018 | 7.046748165 | 14.24772246 | 4.406520817 |
| 917.811235 | 7.055474011 | 14.25220238 | 4.409024093 |
| 918.230889 | 7.064542566 | 14.25610162 | 4.411609049 |
| 918.648815 | 7.073956325 | 14.25945455 | 4.414281777 |
| 919.066363 | 7.08371719  | 14.26231338 | 4.417053546 |
| 919.484934 | 7.093824864 | 14.26474151 | 4.419939134 |

|            |             |             |             |
|------------|-------------|-------------|-------------|
| 919.484934 | 7.104253968 | 14.26682137 | 4.422947838 |
| 920.327155 | 7.114939149 | 14.2686461  | 4.426081373 |
| 920.749192 | 7.125776196 | 14.2703267  | 4.429337601 |
| 921.170106 | 7.136643304 | 14.27198836 | 4.432709815 |
| 921.589601 | 7.14744194  | 14.27376569 | 4.436201297 |
| 922.008653 | 7.158095974 | 14.27579923 | 4.439823123 |
| 922.428876 | 7.16854842  | 14.27823019 | 4.443595256 |
| 922.851572 | 7.178732358 | 14.28119157 | 4.447536995 |
| 923.277215 | 7.188562465 | 14.28480047 | 4.451657109 |
| 923.7057   | 7.197958725 | 14.28915078 | 4.455959239 |
| 924.137038 | 7.206860484 | 14.29430377 | 4.460447016 |
| 924.571794 | 7.215245282 | 14.30029799 | 4.465127347 |
| 925.011024 | 7.223123269 | 14.30714564 | 4.47001119  |
| 925.011024 | 7.230530057 | 14.31483167 | 4.475110321 |
| 925.907775 | 7.237523697 | 14.32331325 | 4.480437731 |
| 926.367344 | 7.244172476 | 14.33250725 | 4.485996309 |
| 926.834953 | 7.250553422 | 14.34229214 | 4.491781152 |
| 927.309925 | 7.256741733 | 14.35249883 | 4.497772328 |
| 927.790461 | 7.262804007 | 14.36290978 | 4.503929104 |
| 928.273878 | 7.268792463 | 14.37327338 | 4.510192544 |
| 928.757185 | 7.274746692 | 14.38333968 | 4.516492007 |
| 929.237893 | 7.28069705  | 14.39288747 | 4.522763228 |
| 929.714952 | 7.286674605 | 14.40176169 | 4.528953448 |
| 930.189408 | 7.292722201 | 14.40988691 | 4.53503614  |
| 930.664312 | 7.298896034 | 14.41725589 | 4.541009001 |
| 931.143672 | 7.305260363 | 14.42389774 | 4.546876745 |
| 931.143672 | 7.311857611 | 14.42985233 | 4.55262638  |
| 932.123067 | 7.318674884 | 14.4351504  | 4.558192142 |
| 932.615946 | 7.325618195 | 14.43983562 | 4.563473    |
| 933.101802 | 7.332569204 | 14.44400003 | 4.568371624 |
| 933.576497 | 7.339443487 | 14.44779235 | 4.572850697 |
| 934.03933  | 7.34620376  | 14.45138734 | 4.576922931 |
| 934.491604 | 7.35284746  | 14.45495201 | 4.580623781 |
| 934.935628 | 7.359387171 | 14.45864596 | 4.583997979 |
| 935.374171 | 7.365849329 | 14.46261376 | 4.58709173  |
| 935.810001 | 7.372262075 | 14.46699513 | 4.589948004 |
| 936.245576 | 7.378656939 | 14.47192502 | 4.592605429 |
| 936.682962 | 7.385065642 | 14.47753583 | 4.595094502 |
| 937.123825 | 7.391520262 | 14.48395828 | 4.597443943 |
| 937.123825 | 7.398058793 | 14.49131479 | 4.599673995 |
| 938.019979 | 7.404719687 | 14.49971418 | 4.601803694 |
| 938.475086 | 7.411539786 | 14.50922771 | 4.603841068 |
| 938.93292  | 7.418551045 | 14.51986762 | 4.605790257 |
| 939.390905 | 7.425779325 | 14.53158011 | 4.607650235 |
| 939.84631  | 7.433248476 | 14.54424226 | 4.609417868 |
| 940.296885 | 7.440985362 | 14.55768125 | 4.611088534 |
| 940.741268 | 7.449019214 | 14.57170814 | 4.612663852 |
| 941.17926  | 7.457383452 | 14.5861345  | 4.61414334  |
| 941.611948 | 7.466124909 | 14.60080975 | 4.615534116 |
| 942.041629 | 7.47531247  | 14.61562454 | 4.616844518 |
| 942.471487 | 7.485030985 | 14.63049994 | 4.618082731 |
| 942.905163 | 7.495381078 | 14.64538011 | 4.619259986 |
| 942.905163 | 7.506470398 | 14.66019235 | 4.620382875 |
| 943.797623 | 7.518390198 | 14.67482747 | 4.621459802 |
| 944.260661 | 7.5311918   | 14.68911353 | 4.622495175 |
| 944.734316 | 7.54484663  | 14.70280136 | 4.623495297 |
| 945.214362 | 7.55920133  | 14.71558907 | 4.624467462 |
| 945.693976 | 7.573989157 | 14.72719488 | 4.625418037 |
| 946.166581 | 7.588913625 | 14.73746001 | 4.626362532 |
| 946.628886 | 7.60376239  | 14.74640374 | 4.627319333 |
| 947.081423 | 7.618440247 | 14.75418346 | 4.628316225 |
| 947.52718  | 7.632937173 | 14.76101473 | 4.629379711 |
| 947.970182 | 7.647277431 | 14.76712526 | 4.630541791 |
| 948.4147   | 7.661488229 | 14.7727475  | 4.6318305   |
| 948.864916 | 7.675578486 | 14.77811017 | 4.633281333 |
| 948.864916 | 7.689525631 | 14.78345716 | 4.634924312 |
| 949.7972   | 7.703258098 | 14.78903821 | 4.636792306 |
| 950.283799 | 7.71662932  | 14.79511463 | 4.638906951 |
| 950.782735 | 7.729399814 | 14.80190595 | 4.641270189 |

|            |             |             |             |
|------------|-------------|-------------|-------------|
| 951.287559 | 7.741253118 | 14.8095293  | 4.64384352  |
| 951.787985 | 7.751881167 | 14.81793421 | 4.64654888  |
| 952.274344 | 7.761118166 | 14.8269358  | 4.649290331 |
| 952.74225  | 7.76900863  | 14.83632266 | 4.651994116 |
| 953.193168 | 7.775729558 | 14.84595426 | 4.65462225  |
| 953.63214  | 7.781500236 | 14.85576201 | 4.657162823 |
| 954.06576  | 7.78651876  | 14.86573175 | 4.6596183   |
| 954.50123  | 7.790952749 | 14.87587958 | 4.661992953 |
| 954.945908 | 7.794932437 | 14.88622401 | 4.664281975 |
| 954.945908 | 7.798561333 | 14.89674245 | 4.666470438 |
| 955.885869 | 7.801904989 | 14.90730532 | 4.668511041 |
| 956.379998 | 7.804989229 | 14.91758949 | 4.670321142 |
| 956.876376 | 7.807824538 | 14.92713374 | 4.671801976 |
| 957.362948 | 7.810439104 | 14.93558309 | 4.672897468 |
| 957.835382 | 7.812910388 | 14.94282283 | 4.673599163 |
| 958.295895 | 7.815328452 | 14.94890069 | 4.673924636 |
| 958.749202 | 7.817787884 | 14.95389837 | 4.673886321 |
| 959.20012  | 7.820372014 | 14.95789114 | 4.67349117  |
| 959.652782 | 7.823165196 | 14.96093146 | 4.672730639 |
| 960.110531 | 7.826245921 | 14.96305735 | 4.671594119 |
| 960.575909 | 7.829696062 | 14.96430782 | 4.670062507 |
| 961.050439 | 7.833594787 | 14.96473017 | 4.668117031 |
| 961.050439 | 7.838003388 | 14.96439334 | 4.665749762 |
| 962.024268 | 7.842952015 | 14.96340529 | 4.662967406 |
| 962.515593 | 7.848413858 | 14.96192228 | 4.659811847 |
| 963.000574 | 7.854297892 | 14.96013306 | 4.656359359 |
| 963.472677 | 7.860480003 | 14.95822221 | 4.652700178 |
| 963.929139 | 7.866860134 | 14.95633314 | 4.648909494 |
| 964.371312 | 7.873382968 | 14.95455913 | 4.645027469 |
| 964.803181 | 7.880041632 | 14.95294757 | 4.64106239  |
| 965.229876 | 7.886859443 | 14.95152789 | 4.63700075  |
| 965.656805 | 7.893883497 | 14.95031623 | 4.632819957 |
| 966.089134 | 7.901162446 | 14.94932732 | 4.628492595 |
| 966.531014 | 7.908742657 | 14.94857407 | 4.623994629 |
| 966.983968 | 7.916630918 | 14.94806655 | 4.619330816 |
| 966.983968 | 7.924756122 | 14.94779724 | 4.614550628 |
| 967.904789 | 7.932962086 | 14.94772936 | 4.609756598 |
| 968.35535  | 7.941084784 | 14.9477888  | 4.605058191 |
| 968.791929 | 7.949040528 | 14.94788953 | 4.600506546 |
| 969.215253 | 7.956843824 | 14.94794757 | 4.596097508 |
| 969.628846 | 7.964560986 | 14.94788113 | 4.591796442 |
| 970.037017 | 7.972273779 | 14.94761668 | 4.587554846 |
| 970.44396  | 7.980066815 | 14.94707959 | 4.583325175 |
| 970.853555 | 7.988016055 | 14.94618696 | 4.579063419 |
| 971.269447 | 7.996196489 | 14.94485196 | 4.57472082  |
| 971.69513  | 8.004679172 | 14.94298109 | 4.570254569 |
| 972.133793 | 8.013524314 | 14.94048019 | 4.565618205 |
| 972.587613 | 8.022769877 | 14.93726328 | 4.5607727   |
| 972.587613 | 8.032389078 | 14.93329668 | 4.55570902  |
| 973.534639 | 8.042250131 | 14.92864546 | 4.550459237 |
| 974.013996 | 8.052126713 | 14.92349876 | 4.545111427 |
| 974.48537  | 8.06178234  | 14.91813157 | 4.539756267 |
| 974.944426 | 8.071079447 | 14.91279823 | 4.534446833 |
| 975.391848 | 8.079984945 | 14.90768994 | 4.52917657  |
| 975.831291 | 8.088528971 | 14.90294505 | 4.523911217 |
| 976.267567 | 8.096761548 | 14.89868008 | 4.518596499 |
| 976.705773 | 8.104729019 | 14.89500981 | 4.513175698 |
| 977.150983 | 8.112464197 | 14.89206631 | 4.507586544 |
| 977.607994 | 8.119983802 | 14.89000944 | 4.501775996 |
| 978.080537 | 8.127271244 | 14.88903482 | 4.495703349 |
| 978.56928  | 8.134261023 | 14.88935624 | 4.489373409 |
| 978.56928  | 8.140825014 | 14.89113764 | 4.482878582 |
| 979.568091 | 8.146815103 | 14.89439126 | 4.476401305 |
| 980.055562 | 8.152160317 | 14.89894471 | 4.470122566 |
| 980.52661  | 8.156915806 | 14.90455162 | 4.46413953  |
| 980.982715 | 8.161211128 | 14.9109958  | 4.458460693 |
| 981.428136 | 8.165193745 | 14.91812478 | 4.453058956 |
| 981.867614 | 8.168999039 | 14.92581777 | 4.447901887 |
| 982.305561 | 8.172753823 | 14.93397919 | 4.44296263  |

|            |             |             |             |
|------------|-------------|-------------|-------------|
| 982.745848 | 8.176575643 | 14.9425124  | 4.438225551 |
| 983.191521 | 8.18057521  | 14.95130864 | 4.433691291 |
| 983.644077 | 8.184849779 | 14.9602192  | 4.429376095 |
| 984.102379 | 8.189472173 | 14.96903201 | 4.425321132 |
| 984.562173 | 8.194470739 | 14.97748089 | 4.421584862 |
| 984.562173 | 8.199829286 | 14.9853051  | 4.418216378 |
| 985.464112 | 8.205513211 | 14.99232187 | 4.415234536 |
| 985.900314 | 8.211501459 | 14.99845532 | 4.412618658 |
| 986.327524 | 8.217794297 | 15.00371003 | 4.410331727 |
| 986.748418 | 8.224410298 | 15.00812776 | 4.408325045 |
| 987.165846 | 8.231376418 | 15.01176264 | 4.406559863 |
| 987.582151 | 8.238713196 | 15.01466914 | 4.404996265 |
| 987.998882 | 8.246428033 | 15.01690783 | 4.403606395 |
| 988.416859 | 8.254515631 | 15.01854837 | 4.402358711 |
| 988.836543 | 8.262959421 | 15.01967845 | 4.401222548 |
| 989.258522 | 8.271742725 | 15.02040358 | 4.400166832 |
| 989.683798 | 8.280852058 | 15.02084663 | 4.399156479 |
| 990.113641 | 8.290276598 | 15.02114836 | 4.398154141 |

Coordinate of **a**, optimized geometry (B3LYP-D3(BJ)/6-31G\*)

|   |              |              |              |
|---|--------------|--------------|--------------|
| C | -3.021404000 | -1.508607000 | -1.176415000 |
| C | -2.079958000 | -1.580023000 | -0.194134000 |
| C | -3.344909000 | 0.829733000  | -0.630552000 |
| C | -3.663651000 | -0.259359000 | -1.395692000 |
| H | -3.268274000 | -2.391157000 | -1.753084000 |
| H | -1.541860000 | -2.474788000 | 0.089139000  |
| H | -3.836917000 | 1.783890000  | -0.774026000 |
| H | -4.421337000 | -0.173109000 | -2.168497000 |
| C | -2.357186000 | 0.793202000  | 0.412338000  |
| S | -1.924267000 | 2.089364000  | 1.370430000  |
| N | -1.749898000 | -0.463418000 | 0.521830000  |
| O | -0.893233000 | -0.704450000 | 1.593447000  |
| C | 0.440502000  | -0.260810000 | 1.452938000  |
| C | 0.856718000  | 0.292967000  | 0.091257000  |
| C | 0.990643000  | -0.839443000 | -0.975874000 |
| H | 0.157553000  | 1.074148000  | -0.213285000 |
| C | 3.059103000  | 0.037540000  | -0.568181000 |
| H | 0.225495000  | -0.775883000 | -1.752587000 |
| H | 0.942926000  | -1.837187000 | -0.514692000 |
| O | 1.147354000  | -0.436523000 | 2.396756000  |
| O | 2.142629000  | 0.856183000  | 0.174892000  |
| O | 2.251726000  | -0.599986000 | -1.559330000 |
| C | 3.724452000  | -0.987546000 | 0.347867000  |
| H | 4.412329000  | -1.613606000 | -0.228602000 |
| H | 4.280213000  | -0.473945000 | 1.136777000  |
| H | 2.982239000  | -1.626933000 | 0.831520000  |
| C | 4.047006000  | 0.948575000  | -1.270845000 |
| H | 4.628140000  | 1.508282000  | -0.533027000 |
| H | 4.731443000  | 0.357752000  | -1.886165000 |
| H | 3.504004000  | 1.650590000  | -1.907862000 |

G = -1180.630109, E = -1180.819258

Coordinate of **b**, optimized geometry (B3LYP-D3(BJ)/6-31G\*)

|   |              |              |              |
|---|--------------|--------------|--------------|
| C | 4.022907000  | -1.670357000 | 0.074014000  |
| C | 2.767050000  | -1.623237000 | -0.456548000 |
| C | 3.860557000  | 0.701873000  | 0.548825000  |
| C | 4.575834000  | -0.466493000 | 0.583838000  |
| H | 4.563459000  | -2.608032000 | 0.100325000  |
| H | 2.234350000  | -2.464584000 | -0.878794000 |
| H | 4.267552000  | 1.625349000  | 0.941657000  |
| H | 5.574640000  | -0.473070000 | 1.009689000  |
| C | 2.534174000  | 0.782861000  | 0.011288000  |
| S | 1.585784000  | 2.163006000  | -0.020007000 |
| N | 2.095453000  | -0.440136000 | -0.492027000 |
| O | 0.850478000  | -0.469659000 | -1.096917000 |
| C | -0.196422000 | -0.545966000 | -0.158793000 |
| C | -1.482157000 | -0.132976000 | -0.843460000 |
| C | -1.929117000 | 1.277360000  | -0.356979000 |
| H | -1.344443000 | -0.162084000 | -1.928934000 |

|   |              |              |              |
|---|--------------|--------------|--------------|
| C | -3.547832000 | -0.218881000 | 0.215775000  |
| H | -1.734501000 | 2.058301000  | -1.092142000 |
| H | -1.438782000 | 1.544536000  | 0.585307000  |
| O | -0.032221000 | -0.888419000 | 0.974434000  |
| O | -2.535487000 | -0.993906000 | -0.468806000 |
| O | -3.328322000 | 1.118159000  | -0.207962000 |
| C | -3.374484000 | -0.373957000 | 1.725214000  |
| H | -4.105889000 | 0.246936000  | 2.251677000  |
| H | -3.524106000 | -1.419401000 | 2.010438000  |
| H | -2.367097000 | -0.086084000 | 2.034081000  |
| C | -4.909356000 | -0.663834000 | -0.284957000 |
| H | -5.067728000 | -1.720531000 | -0.052422000 |
| H | -5.696575000 | -0.075252000 | 0.194953000  |
| H | -4.964101000 | -0.520980000 | -1.366817000 |

G = -1180.640372, E = -1180.829956

Coordinate of **c**, optimized geometry (B3LYP-D3(BJ)/6-31G\*)

|   |              |              |              |
|---|--------------|--------------|--------------|
| C | 1.542305000  | -0.249859000 | -1.036899000 |
| C | 1.974396000  | 1.202326000  | -0.744232000 |
| C | 3.411630000  | -0.209330000 | 0.346887000  |
| H | 1.143302000  | 1.877959000  | -0.536273000 |
| H | 2.571495000  | 1.583382000  | -1.584977000 |
| O | 2.611729000  | -1.022848000 | -0.553383000 |
| O | 2.746457000  | 1.045266000  | 0.430660000  |
| C | 4.798383000  | -0.059370000 | -0.270542000 |
| H | 5.440928000  | 0.532629000  | 0.387981000  |
| H | 5.253413000  | -1.042994000 | -0.419855000 |
| H | 4.732117000  | 0.440914000  | -1.241377000 |
| C | 3.420881000  | -0.838089000 | 1.728907000  |
| H | 3.900648000  | -1.820615000 | 1.690971000  |
| H | 3.975284000  | -0.201234000 | 2.424844000  |
| H | 2.393129000  | -0.950932000 | 2.078240000  |
| H | 1.395686000  | -0.433652000 | -2.105449000 |
| C | 0.258044000  | -0.588469000 | -0.295595000 |
| O | 0.113111000  | -1.011502000 | 0.811439000  |
| O | -0.818020000 | -0.324260000 | -1.165063000 |
| C | -2.494404000 | 0.807482000  | 0.089594000  |
| C | -2.690179000 | -1.560097000 | -0.554949000 |
| C | -3.794821000 | 0.645936000  | 0.674460000  |
| C | -3.920792000 | -1.683713000 | 0.018493000  |
| H | -2.157505000 | -2.351769000 | -1.064256000 |
| C | -4.480142000 | -0.539392000 | 0.646414000  |
| H | -4.205764000 | 1.525119000  | 1.155057000  |
| H | -4.437402000 | -2.634723000 | -0.010474000 |
| H | -5.459226000 | -0.606586000 | 1.111050000  |
| N | -2.045593000 | -0.360280000 | -0.522316000 |
| S | -1.600312000 | 2.221666000  | 0.122892000  |

G = -1180.640908, E = -1180.830137

Coordinate of **c**, optimized geometry (B3LYP-D3(BJ)/6-31G\*)

|   |              |              |              |
|---|--------------|--------------|--------------|
| C | -2.554640000 | -1.537841000 | 1.330946000  |
| C | -1.925153000 | -0.360320000 | 1.615044000  |
| C | -2.335714000 | -1.024619000 | -1.025139000 |
| C | -2.765267000 | -1.866542000 | -0.031589000 |
| H | -2.877412000 | -2.185472000 | 2.136274000  |
| H | -1.710035000 | 0.008510000  | 2.608555000  |
| H | -2.484053000 | -1.262648000 | -2.071164000 |
| H | -3.270720000 | -2.792099000 | -0.290453000 |
| C | -1.652907000 | 0.203919000  | -0.755290000 |
| S | -1.027666000 | 1.238713000  | -1.917498000 |
| N | -1.519823000 | 0.450834000  | 0.604162000  |
| O | -1.001529000 | 1.671825000  | 1.011077000  |
| C | 0.360955000  | 1.937413000  | 0.767149000  |
| C | 1.411144000  | 0.836504000  | 0.740992000  |
| C | 2.361534000  | 0.941483000  | -0.459983000 |
| H | 1.978488000  | 0.994209000  | 1.672084000  |
| C | 1.900115000  | -1.275878000 | -0.090865000 |
| H | 3.164845000  | 1.663957000  | -0.313486000 |
| H | 1.802526000  | 1.175607000  | -1.372987000 |

|   |             |              |              |
|---|-------------|--------------|--------------|
| O | 0.684165000 | 3.088964000  | 0.807301000  |
| O | 0.945732000 | -0.494494000 | 0.678657000  |
| O | 2.918291000 | -0.363987000 | -0.489082000 |
| C | 1.178854000 | -1.867525000 | -1.294183000 |
| H | 1.870018000 | -2.488660000 | -1.871827000 |
| H | 0.339090000 | -2.485129000 | -0.962382000 |
| H | 0.790300000 | -1.071160000 | -1.933478000 |
| C | 2.529061000 | -2.322118000 | 0.815090000  |
| H | 1.767002000 | -3.023132000 | 1.167974000  |
| H | 3.295735000 | -2.879610000 | 0.268913000  |
| H | 2.994474000 | -1.834934000 | 1.676149000  |

G = -1180.631273, E = -1180.822190

## References

---

- 1 K. Danielmeier, E. Steckhan, Efficient pathways to (*R*)- and (*S*)-5-hydroxymethyl-2-oxazolidinone and some derivatives. *Tetrahedron Asym.*, 1995, **6**, 1181-1190, DOI: 10.1016/0957-4166(95)00144-E.
- 2 M. J. Earle, A. Abdur-Rashid, N. D. Priestley, Large scale synthesis of cyclodiphospho-D-glycerate. *J. Org. Chem.*, 1996, **61**, 5697-5700, DOI: 10.1021/jo9601472.
- 3 D. Horton, J. B. Hughes, J. K. Thomson, Extension of sugar chains through acetylenic intermediates. IV. Derivatives of 1-pentyne-D-erythro(and D-threo)-3,4,5-triol, *J. Org. Chem.*, 1968, **33**, 728-734, DOI: 10.1021/jo01266a600.
- 4 D. H. R. Barton, D. Crich, G. Kretzschmar, Formation of carbon-carbon bonds with radicals derived from the esters of thiohydroxamic acids. *Tetrahedron Lett.*, 1984, **25**, 1055-1058, DOI: 10.1016/S0040-4039(01)80099-X.
- 5 K. H. Lee, K.-L. Chin, S. Brumby, Electron spin resonance spectra of free radicals. Part 3. 2,2-Disubstituted 1,3-dioxolan-4-yl radicals. *J. Chem. Soc. Perkin Trans. 2*, 1985, 161-164, DOI: 10.1039/P29850000161.
